# Supplementary material
Source: PubMed Central journal article supplement (PMC3549468)
Supplement: NIHMS391224-supplement-1_si_001.pdf [file NIHMS391224-supplement-1_si_001.pdf]

# Mandelalides A-D, cytotoxic macrolides from a new *Lissoclinum* species of South African tunicate.

Justyna Sikorska,<sup>†</sup> Andrew M. Hau,<sup>†</sup> Clemens Anklin,<sup>‡</sup> Shirley Parker-Nance,<sup>§</sup> Michael T. Davies-  
Coleman,<sup>||</sup> Jane E. Ishmael,<sup>†</sup> Kerry L. McPhail<sup>\*†</sup>

*Department of Pharmaceutical Sciences, College of Pharmacy, 203 Pharmacy Building, Oregon State University, Corvallis, Oregon 97331, United States, Bruker BioSpin, 15 Fortune Drive, Billerica, Massachusetts 01821, United States, Department of Zoology, Nelson Mandela Metropolitan University, Port Elizabeth 6001, South Africa, Department of Chemistry, Rhodes University, PO Box 94, Grahamstown 6140, South Africa*

\* Corresponding author. Tel: +1 541 737 5808. Fax: +1 541 737 3999. E-mail:

[kerry.mcphail@oregonstate.edu](mailto:kerry.mcphail@oregonstate.edu)

<sup>†</sup> Oregon State University.

<sup>‡</sup> Bruker BioSpin.

<sup>§</sup> Department of Zoology, University.

<sup>||</sup> Rhodes University.

## Table of Contents

|                                                                                                                                                                                                                             |    |
|-----------------------------------------------------------------------------------------------------------------------------------------------------------------------------------------------------------------------------|----|
| Table S1. NMR data for mandelalide A ( <b>1</b> ) in pyridine- <i>d</i> <sub>5</sub> , 700 MHz .....                                                                                                                        | 4  |
| Table S2. NMR data for mandelalide B ( <b>2</b> ) in CDCl <sub>3</sub> , 700 MHz .....                                                                                                                                      | 5  |
| Table S3. NMR data for mandelalide B ( <b>2</b> ) in pyridine- <i>d</i> <sub>5</sub> , 700 MHz .....                                                                                                                        | 6  |
| Table S4. NMR data for mandelalide C ( <b>3</b> ) in CDCl <sub>3</sub> , 700 MHz .....                                                                                                                                      | 7  |
| Table S5. NMR data for mandelalide D ( <b>4</b> ) in CDCl <sub>3</sub> , 700 MHz .....                                                                                                                                      | 8  |
| Table S6. NMR data for deacylmandelalide D ( <b>4b</b> ) in CD <sub>3</sub> OD, 700 MHz .....                                                                                                                               | 10 |
| Table S7. Cartesian coordinates for Mandelalide B ( <b>2</b> ) optimized at the B3LYP/6-31G** level .....                                                                                                                   | 11 |
| Figure S1. <sup>1</sup> H NMR spectrum for mandelalide A ( <b>1</b> ; 700 MHz, CDCl <sub>3</sub> ) .....                                                                                                                    | 14 |
| Figure S2. <sup>13</sup> C NMR spectrum for mandelalide A ( <b>1</b> ; 175 MHz, CDCl <sub>3</sub> ) .....                                                                                                                   | 15 |
| Figure S3. COSY spectrum for mandelalide A ( <b>1</b> ; 700 MHz, CDCl <sub>3</sub> ) .....                                                                                                                                  | 16 |
| Figure S4. HSQC spectrum for mandelalide A ( <b>1</b> ; 700 MHz, CDCl <sub>3</sub> ) .....                                                                                                                                  | 17 |
| Figure S5. HMBC spectrum for mandelalide A ( <b>1</b> ; 700 MHz, CDCl <sub>3</sub> ) .....                                                                                                                                  | 18 |
| Figure S6. HMBC spectrum for mandelalide A ( <b>1</b> ), long range <i>J</i> = 4 Hz (700 MHz, CDCl <sub>3</sub> ) .....                                                                                                     | 19 |
| Figure S7. TOCSY spectrum for mandelalide A ( <b>1</b> ), TOCSY mixing time = 60 ms (700 MHz, CDCl <sub>3</sub> ) .....                                                                                                     | 20 |
| Figure S8. TOCSY spectrum for mandelalide A ( <b>1</b> ), TOCSY mixing time = 100 ms (700 MHz, CDCl <sub>3</sub> ) .....                                                                                                    | 21 |
| Figure S9. a) Partial TOCSY spectrum for mandelalide A ( <b>1</b> ; 700 MHz, CDCl <sub>3</sub> ), b) The magnetization transfer pattern of TOCSY signals for the mandelalide A monosaccharide and α- and β-L-rhamnose. .... | 22 |
| Figure S10. ROESY spectrum for mandelalide A ( <b>1</b> ; 700 MHz, CDCl <sub>3</sub> ) .....                                                                                                                                | 23 |
| Figure S11. HETLOC spectrum for mandelalide A ( <b>1</b> ; 700 MHz, CDCl <sub>3</sub> ) .....                                                                                                                               | 24 |
| Figure S12. <i>F</i> <sub>2</sub> slice of HETLOC spectrum for mandelalide A ( <b>1</b> ) anomeric C-1' (700 MHz, CDCl <sub>3</sub> ) .....                                                                                 | 25 |
| Figure S13. <i>F</i> <sub>2</sub> slice of HETLOC spectrum for C-20 of mandelalide A ( <b>1</b> , 700 MHz, CDCl <sub>3</sub> ) .....                                                                                        | 26 |
| Figure S14. <i>F</i> <sub>2</sub> slice of HETLOC spectrum for mandelalide A ( <b>1</b> ) for C-23 (700 MHz, CDCl <sub>3</sub> ) .....                                                                                      | 27 |
| Figure S15. <sup>1</sup> H NMR spectrum for mandelalide A ( <b>1</b> ; 700 MHz, py- <i>d</i> <sub>5</sub> ) .....                                                                                                           | 28 |
| Figure S16. COSY NMR spectrum for mandelalide A ( <b>1</b> ; 700 MHz, py- <i>d</i> <sub>5</sub> ) .....                                                                                                                     | 29 |
| Figure S17. HSQC NMR spectrum for mandelalide A ( <b>1</b> ; 700 MHz, py- <i>d</i> <sub>5</sub> ) .....                                                                                                                     | 30 |
| Figure S18. HMBC NMR spectrum for mandelalide A ( <b>1</b> ; 700 MHz, py- <i>d</i> <sub>5</sub> ) .....                                                                                                                     | 31 |
| Figure S19. TOCSY NMR spectrum for mandelalide A ( <b>1</b> ; 700 MHz, py- <i>d</i> <sub>5</sub> ) .....                                                                                                                    | 32 |
| Figure S20. ROESY NMR spectrum for mandelalide A ( <b>1</b> ; 700 MHz, py- <i>d</i> <sub>5</sub> ) .....                                                                                                                    | 33 |
| Figure S21. <sup>1</sup> H NMR spectrum for mandelalide B, ( <b>2</b> ; 700 MHz, CDCl <sub>3</sub> ) .....                                                                                                                  | 34 |
| Figure S22. <sup>13</sup> C NMR spectrum for mandelalide B, ( <b>2</b> ; 175 MHz, CDCl <sub>3</sub> ) .....                                                                                                                 | 35 |
| Figure S23. <sup>13</sup> C gated decoupled NMR spectrum for mandelalide B ( <b>2</b> ; 175 MHz, CDCl <sub>3</sub> ) .....                                                                                                  | 36 |
| Figure S24. COSY NMR spectrum for mandelalide B, ( <b>2</b> ; 700 MHz, CDCl <sub>3</sub> ) .....                                                                                                                            | 37 |
| Figure S25. HSQC NMR spectrum for mandelalide B, ( <b>2</b> ; 700 MHz, CDCl <sub>3</sub> ) .....                                                                                                                            | 38 |

|                                                                                                                                  |    |
|----------------------------------------------------------------------------------------------------------------------------------|----|
| Figure S26. HMBC NMR spectrum for mandelalide B, ( <b>2</b> ; 700 MHz, CDCl <sub>3</sub> ) .....                                 | 39 |
| Figure S27. ROESY NMR spectrum for mandelalide B, ( <b>2</b> ; 700 MHz, CDCl <sub>3</sub> ) .....                                | 40 |
| Figure S28. HETLOC NMR spectrum for mandelalide B, ( <b>2</b> ; 700 MHz, CDCl <sub>3</sub> ) .....                               | 41 |
| Figure S29. F2 slice of HETLOC spectrum for C-3 of mandelalide B ( <b>2</b> ; 700 MHz, CDCl <sub>3</sub> ).....                  | 42 |
| Figure S30. <sup>1</sup> H NMR spectrum for mandelalide B, ( <b>2</b> ; 700 MHz, py- <i>d</i> <sub>5</sub> ) .....               | 43 |
| Figure S31. <sup>13</sup> C NMR spectrum for mandelalide B ( <b>2</b> ; 175 MHz, py- <i>d</i> <sub>5</sub> ) .....               | 44 |
| Figure S32. COSY NMR spectrum for mandelalide B ( <b>2</b> ; 700 MHz, py- <i>d</i> <sub>5</sub> ) .....                          | 45 |
| Figure S33. HSQC NMR spectrum for mandelalide B, ( <b>2</b> ; 700 MHz, py- <i>d</i> <sub>5</sub> ) .....                         | 46 |
| Figure S34. HMBC NMR spectrum for mandelalide B ( <b>2</b> ; 700 MHz, py- <i>d</i> <sub>5</sub> ) .....                          | 47 |
| Figure S35. ROESY NMR spectrum for mandelalide B ( <b>2</b> ; 700 MHz, py- <i>d</i> <sub>5</sub> ).....                          | 48 |
| Figure S36. TOCSY NMR spectrum for mandelalide B, ( <b>2</b> ; 700 MHz, py- <i>d</i> <sub>5</sub> ).....                         | 49 |
| Figure S37. <sup>1</sup> H NMR spectrum for mandelalide C ( <b>3</b> ; 700 MHz, CDCl <sub>3</sub> ) .....                        | 50 |
| Figure S38. <sup>13</sup> C NMR spectrum for mandelalide C ( <b>3</b> ; 175 MHz, CDCl <sub>3</sub> ) .....                       | 51 |
| Figure S39. COSY NMR spectrum for mandelalide C ( <b>3</b> ; 700 MHz, CDCl <sub>3</sub> ) .....                                  | 52 |
| Figure S40. HSQC NMR spectrum for mandelalide C ( <b>3</b> ; 700 MHz, CDCl <sub>3</sub> ).....                                   | 53 |
| Figure S41. HMBC NMR spectrum for mandelalide C ( <b>3</b> ; 700 MHz, CDCl <sub>3</sub> ).....                                   | 54 |
| Figure S42. TOCSY NMR spectrum for mandelalide C ( <b>3</b> ; 700 MHz, CDCl <sub>3</sub> ) .....                                 | 55 |
| Figure S43. ROESY NMR spectrum for mandelalide C ( <b>3</b> ; 700 MHz, CDCl <sub>3</sub> ) .....                                 | 56 |
| Figure S44. <sup>1</sup> H NMR spectrum for mandelalide D ( <b>4</b> ; 700 MHz, CDCl <sub>3</sub> ).....                         | 57 |
| Figure S45. <sup>13</sup> C NMR spectrum for mandelalide D ( <b>4</b> ; 175 MHz, CDCl <sub>3</sub> ).....                        | 58 |
| Figure S46. COSY NMR spectrum for mandelalide D ( <b>4</b> ; 700 MHz, CDCl <sub>3</sub> ) .....                                  | 59 |
| Figure S47. HSQC NMR spectrum for mandelalide D ( <b>4</b> ; 700 MHz, CDCl <sub>3</sub> ) .....                                  | 60 |
| Figure S48. HMBC NMR spectrum for mandelalide D ( <b>4</b> ; 700 MHz, CDCl <sub>3</sub> ) .....                                  | 61 |
| Figure S49. TOCSY NMR spectrum for mandelalide D ( <b>4</b> ; 700 MHz, CDCl <sub>3</sub> ).....                                  | 62 |
| Figure S50. ROESY NMR spectrum for mandelalide D ( <b>4</b> ; 700 MHz, CDCl <sub>3</sub> ) .....                                 | 63 |
| Figure S51. <sup>1</sup> H NMR spectrum for deacylmandelalide D ( <b>4b</b> ; 700 MHz, MeOD).....                                | 64 |
| Figure S52. <sup>13</sup> C NMR spectrum for deacylmandelalide D ( <b>4b</b> ; 175 MHz, MeOD).....                               | 65 |
| Figure S53. COSY NMR spectrum for deacylmandelalide D ( <b>4b</b> ; 700 MHz, MeOD) .....                                         | 66 |
| Figure S54. HSQC NMR spectrum for deacylmandelalide D ( <b>4b</b> ; 700 MHz, MeOD) .....                                         | 67 |
| Figure S55. HMBC NMR spectrum for deacylmandelalide D ( <b>4b</b> ; 700 MHz, MeOH) .....                                         | 68 |
| Figure S56. GC-MS chromatograms for rhamnose standards and mandelalide A hydrolysate. ....                                       | 69 |
| Figure S57. The dose response curves for mandelalides A and B in mouse Neuro2A neuroblastoma and human NCI-H460 cell lines ..... | 70 |

Table S1. NMR data for mandelalide A (**1**) in pyridine-*d*<sub>5</sub>, 700 MHz

| No. | $\delta_c$ (mult) | $\delta_H$ ( <i>J</i> in Hz) | COSY          | HMBC           | ROESY                                                                         |
|-----|-------------------|------------------------------|---------------|----------------|-------------------------------------------------------------------------------|
| 1   | 167.0             | -                            |               |                |                                                                               |
| 2   | 124.1             | 6.19 (dd, 15.4, 1.3)         | 3, 4a         | 1, 4           | 3 <sup>a</sup> , 4b <sup>a</sup>                                              |
| 3   | 146.9             | 7.18 (ddd, 15.0, 10.5, 4.5)  | 2, 4a, 4b     | 1              | 2 <sup>a</sup> , 4a, 4b <sup>a</sup>                                          |
| 4a  | 39.4              | 2.22 (m)                     | 3             | 2, 3, 5        | 5 <sup>a</sup> , 6ax                                                          |
| 4b  | 39.4              | 2.28 (m)                     | 3, 5          | 2, 3, 5        | 5 <sup>a</sup> , 6ax, 6eq                                                     |
| 5   | 74.2              | 3.24 (dd, 10.9, 10.9)        | 4b, 6ax       |                | 4a <sup>a</sup> , 4b <sup>a</sup> , 6ax <sup>a</sup> , 6eq, 9                 |
| 6ax | 38.3              | 1.20 (m)                     | 5, 6eq, 7     | 4, 5, 7        | 4a, 4b, 5 <sup>a</sup> , 6eq, 8eq <sup>a</sup>                                |
| 6eq | 38.3              | 2.04 (m)                     | 6ax, 7        | 7, 8           | 4a, 4b <sup>a</sup> , 5, 6ax, 8ax <sup>a</sup> , 1'                           |
| 7   | 73.3              | 4.02 (m)                     | 6ax, 8ax      | 1'             | 5, 6eq, 8eq, 8ax <sup>a</sup> , 9, 1', 5', 6'                                 |
| 8ax | 40.6              | 1.34 (m)                     | 7, 8eq, 9     | 6, 7, 10       | 6eq <sup>a</sup> , 7 <sup>a</sup> , 9 <sup>a</sup> , 8eq,                     |
| 8eq | 40.6              | 1.99 (dd, 12.2, 3.9)         | 7, 8ax        | 6, 7           | 7, 8ax, 9, 10a, 1', 5'                                                        |
| 9   | 72.7              | 3.27 (dd, 10.8, 10.8)        | 8ax, 10b      |                | 5, 8ax <sup>a</sup> , 8eq, 10a, 10b <sup>a</sup> , 11, 25                     |
| 10a | 43.7              | 1.18 (m)                     | 9, 10b, 11    | 8              | 8ax, 8eq, 9, 10b <sup>a</sup> , 11 <sup>b</sup> , 12, 25                      |
| 10b | 43.7              | 1.60 (ddd, 14.2, 11.7, 3.6)  | 9, 10a, 11    | 9, 25          | 8ax, 9 <sup>a</sup> , 10a, 11                                                 |
| 11  | 34.6              | 2.72 (m)                     | 10a, 12, 25   |                | 9, 10a <sup>c</sup> , 10b, 12 <sup>a</sup> , 13, 25 <sup>a</sup>              |
| 12  | 141.9             | 5.43 (dd, 14.8, 9.8)         | 11, 13        | 10, 11, 14, 25 | 13 <sup>a</sup> , 14                                                          |
| 13  | 124.8             | 6.52 (dd, 14.7, 10.8)        | 12, 14        | 11, 14, 15     | 11, 12 <sup>a</sup> , 14 <sup>a</sup> , 16b, 21                               |
| 14  | 131.7             | 6.11 (dd, 10.6, 10.6)        | 13, 15        | 12, 13, 16     | 12, 13 <sup>a</sup> , 15                                                      |
| 15  | 128.2             | 5.36 (ddd, 11.1, 11.1, 5.6)  | 14, 16a, 16b  | 13, 16         | 14, 17, 16a <sup>a</sup> , 16b <sup>a</sup>                                   |
| 16a | 31.9              | 1.85 (m)                     | 15, 16b       | 14, 16         | 15 <sup>a</sup> , 16b <sup>a</sup> , 17, 26                                   |
| 16b | 31.9              | 2.36 (ddd, 13.5, 11.0, 11.0) | 15, 16a, 17   | 14, 15, 17     | 13, 15 <sup>a</sup> , 16a <sup>a</sup> , 21                                   |
| 17  | 81.5              | 4.01 (m)                     | 18            | 15, 19, 20     | 15, 18, 19b, 26                                                               |
| 18  | 37.9              | 2.33 (m)                     | 17, 19a, 26   | 16, 19, 26     | 17, 19a <sup>a</sup> , 19b <sup>a</sup> , 20, 26 <sup>a</sup>                 |
| 19a | 37.0              | 1.36 (m)                     | 18, 19b, 20   | 18, 21, 20, 26 | 18 <sup>a</sup> , 19b, 21, 22b, 26                                            |
| 19b | 37.0              | 1.87 (m)                     | 18, 19a, 20   | 17, 18         | 19a, 20, 22a, 22b                                                             |
| 20  | 85.0              | 3.91 (m)                     | 19a, 19b      | 21             | 18, 19b, 22a <sup>a</sup> , 22b                                               |
| 21  | 73.5              | 3.94 (ddd, 8.3, 8.3, 1.6)    | 22a           | 20             | 13, 16b, 19a, 22a <sup>a</sup> , 22b <sup>a</sup> , 23                        |
| 22a | 35.9              | 2.02 (ddd, 13.8, 11.1, 1.5)  | 21, 22b, 23   | 20, 21         | 19b, 21 <sup>a</sup> , 23 <sup>a</sup> , 24a, 24b                             |
| 22b | 35.9              | 2.21 (m)                     | 21, 22a, 23   | 23             | 19a, 19b, 21, 22a <sup>a</sup> , 23 <sup>a</sup> , 24a, 24b                   |
| 23  | 72.6              | 5.98 (ddd, 10.0, 4.5, 4.5)   | 22b, 24a, 24b | 1, 22          | 21, 22a <sup>a</sup> , 22b <sup>a</sup> , 24a <sup>a</sup> , 24b <sup>a</sup> |
| 24a | 64.7              | 4.13 (dd, 11.4, 4.2)         | 23, 24b       | 22             | 22a, 22b, 23                                                                  |
| 24b | 64.7              | 4.22 (m)                     | 23, 24a       | 22             | 22a, 22b, 23, 24a <sup>a</sup>                                                |
| 25  | 18.9              | 0.91 (d, 6.5)                | 11            | 10, 11, 12     | 9, 10a, 11 <sup>a</sup>                                                       |
| 26  | 14.7              | 0.94 (d, 6.8)                | 18            | 17, 18         | 17, 18 <sup>a</sup> , 19a, 19b                                                |
| 1'  | 96.4              | 5.46 (d, 0.9)                | 2'            | 2', 3', 5'     | 6eq, 7, 2', 7'                                                                |
| 2'  | 83.1              | 3.91 (m)                     | 1', 3'        | 4', 7'         | 1', 3' <sup>a</sup> , 7'                                                      |
| 3'  | 72.9              | 4.51 (dd, 8.9, 3.3)          | 2', 4'        | 4'             | 2' <sup>a</sup> , 4' <sup>a</sup>                                             |
| 4'  | 74.7              | 4.20 (dd, 9.2, 9.2)          | 3'            | 3', 5', 6'     | 6', 3' <sup>a</sup>                                                           |
| 5'  | 70.7              | 4.23 (m)                     | 6'            | 3', 4'         | 6' <sup>a</sup> , 7', 6eq or 8eq                                              |
| 6'  | 19.1              | 1.72 (d, 5.9)                | 5'            | 4', 5'         | 7, 4', 5'                                                                     |
| 7'  | 59.8              | 3.65 (s)                     |               | 2'             | 1', 2', 3'                                                                    |

<sup>13</sup>C chemical shifts were measured from HMBC spectrum. HMBC correlations are presented from proton to indicated carbon. a - COSY artifacts observed in ROESY spectrum.

Table S2. NMR data for mandelalide B (2) in CDCl<sub>3</sub>, 700 MHz

| No. | $\delta_c$ (mult) | $\delta_H$ (J in Hz)              | COSY               | HMBC           | ROESY                                                                |
|-----|-------------------|-----------------------------------|--------------------|----------------|----------------------------------------------------------------------|
| 1   | 175.6 (s)         | -                                 |                    |                |                                                                      |
| 2   | 79.3 (s)          | -                                 |                    |                |                                                                      |
| 3   | 69.5 (d)          | 5.48 (dd, 6.0, 1.7)               | 4a, 4b             | 2, 4, 5, 1''   | 4a <sup>a</sup> , 4b, 5, 9, 11, 23, 24b                              |
| 4a  | 36.3 (t)          | 1.59 (m)                          | 3, 4b              | 3              | 3 <sup>a</sup> , 4b <sup>a</sup> , 5, 6eq                            |
| 4b  |                   | 2.14 (ddd, 15.0, 11.7, 1.5)       | 3, 4a, 5           | 2, 5           | 3, 4a <sup>a</sup> , 5 <sup>a</sup> , 6ax, 28                        |
| 5   | 72.7 (d)          | 3.30 (dddd, 11.4, 11.4, 1.5, 1.5) | 4b, 6ax            | 3, 4, 7, 9     | 3, 4a, 4b <sup>a</sup> , 7, 8eq, 9                                   |
| 6ax | 37.4 (t)          | 1.10 (ddd, 11.7, 11.7, 11.7)      | 5, 6eq, 7          | 4, 5, 8        | 4b, 5 <sup>a</sup> , 6eq <sup>a</sup> , 7 <sup>a</sup>               |
| 6eq |                   | 1.89 (m)                          | 6ax, 7             | 7, 8           | 4a, 5, 6ax <sup>a</sup> , 7, 1'                                      |
| 7   | 73.3 (d)          | 3.75 (m)                          | 6ax, 6eq, 8ax, 8eq | 8, 1'          | 5, 6ax <sup>a</sup> , 6eq, 8ax <sup>a</sup> , 8eq, 9, 1'             |
| 8ax | 39.6 (t)          | 1.23 (m)                          | 7, 8eq, 9          | 6, 7, 9, 10    | 6eq <sup>a</sup> , 7 <sup>a</sup> , 9 <sup>a</sup> , 10b             |
| 8eq |                   | 1.81 (dddd, 12.4, 4.8, 1.8, 1.8)  | 7, 8ax             | 6, 7           | 7, 8ax, 9, 10a, 5'                                                   |
| 9   | 72.4 (d)          | 3.39 (dddd, 11.0, 11.0, 2.2, 2.2) | 6ax, 10b           |                | 3, 5, 7, 8ax <sup>a</sup> , 8eq, 10a, 10b <sup>a</sup> , 11, 25      |
| 10a | 42.2 (t)          | 1.18 (ddd, 14.1, 12.3, 2.8)       | 9, 10b, 11         | 11             | 8eq, 9, 10b <sup>a</sup> , 11 <sup>a</sup> , 12                      |
| 10b |                   | 1.57 (m)                          | 9, 10a, 11         | 8, 9, 11, 25   | 8ax, 9 <sup>a</sup> , 10a <sup>a</sup> , 11                          |
| 11  | 33.9 (d)          | 2.50 (m)                          | 10a, 10b, 12, 25   | 13             | 9, 10a <sup>a</sup> , 10b, 12 <sup>a</sup> , 13, 23, 25 <sup>a</sup> |
| 12  | 142.1 (d)         | 5.50 (dd, 15.1, 9.8)              | 11, 13             | 10, 11, 14, 25 | 10a, 11 <sup>a</sup> , 13 <sup>a</sup> , 14, 25                      |
| 13  | 123.3 (d)         | 6.40 (dd, 14.7, 11.3)             | 12, 14             | 11, 14, 15     | 11, 12 <sup>a</sup> , 14 <sup>a</sup> , 16b, 21                      |
| 14  | 131.0 (d)         | 6.10 (dd, 11.1, 11.1)             | 13, 15             | 12, 13, 16     | 12, 13 <sup>a</sup> , 15 <sup>a</sup>                                |
| 15  | 127.1 (d)         | 5.28 (ddd, 11.1, 11.1, 5.2)       | 14, 16a, 16b       | 13, 16, 17     | 14 <sup>a</sup> , 16a, 16b <sup>a</sup> , 17                         |
| 16a | 30.7 (t)          | 1.90 (m)                          | 15, 16b            | 14, 15, 17     | 15, 16b, 17, 26                                                      |
| 16b |                   | 2.31 (ddd, 13.6, 11.6, 11.5)      | 15, 16a, 17        | 14, 15, 17, 18 | 13, 15 <sup>a</sup> , 16a, 17 <sup>a</sup> , 19a, 21, 26             |
| 17  | 81.5 (d)          | 3.95 (ddd, 11.6, 7.46, 1.6)       | 16a, 16b, 18       | 15, 19, 20     | 15, 16a, 16b <sup>a</sup> , 18, 20 <sup>b</sup> , 26                 |
| 18  | 38.3 (d)          | 2.52 (m)                          | 17, 19a, 19b, 26   | 16, 17, 19, 26 | 17, 19a <sup>a</sup> , 19b, 20, 26 <sup>a</sup>                      |
| 19a | 35.6 (t)          | 1.33 (ddd, 12.2, 12.2, 8.2)       | 18, 19b, 20        | 18, 20, 21, 26 | 16b, 18 <sup>a</sup> , 19b, 20 or 21, 22a, 26                        |
| 19b |                   | 2.05 (ddd, 12.8, 6.9, 6.9)        | 18, 19a, 20        | 17, 18, 21     | 18, 19a, 20, 22a, 26                                                 |
| 20  | 82.1 (t)          | 3.77 (m)                          | 19a, 19b           | 21             | 18, 19a, 19b, 22a, 22b                                               |
| 21  | 74.5 (d)          | 3.76 (m)                          | 22b                | 20, 23         | 13, 16b, 23, 27                                                      |
| 22a | 37.9 (t)          | 1.51 (m)                          | 22b, 23            | 23             | 19a, 19b, 20 or 21, 22b <sup>a</sup> , 23 <sup>a</sup> , 24a         |
| 22b |                   | 1.64 (m)                          | 21, 22a            | 21             | 20 <sup>a</sup> or 21 <sup>a</sup> , 22a <sup>a</sup> , 23, 24a      |
| 23  | 74.9 (d)          | 4.84 (dddd, 10.4, 10.4, 4.9, 1.0) | 22a, 24a, 24b      | 21, 22         | 3, 11, 21, 22a <sup>a</sup> , 22b, 24a <sup>a</sup> , 24b, 25        |
| 24a | 39.7 (t)          | 1.93 (dd, 12.7, 10.7)             | 23, 24b            | 2, 3, 22, 23   | 22a, 22b, 23 <sup>a</sup> , 24b                                      |
| 24b |                   | 2.39 (dd, 12.8, 4.9)              | 23, 24a            | 1, 2, 3        | 3, 23, 24a                                                           |
| 25  | 18.5 (q)          | 1.07 (d, 6.6)                     | 11                 | 10, 11, 12     | 9, 10a, 11, 12, 23                                                   |
| 26  | 14.2 (q)          | 1.03 (d, 6.9)                     | 18                 | 17, 18, 19     | 16a, 16b, 17, 18 <sup>a</sup> , 19a, 19b                             |
|     | OH-21             | 2.70 (br s)                       | 21, 22a            | 22             | 21                                                                   |
|     | OH-2              | 2.87 (s)                          |                    | 1, 2, 3, 24    | 4b                                                                   |
| 1'  | 94.8 (d)          | 5.04 (s)                          | 2'                 | 7, 2', 3', 5'  | 6eq, 7 or 3', 2', 5', 7'                                             |
| 2'  | 80.9 (d)          | 3.33 (ddd, 3.0, 1.5, 1.3)         | 1', 3'             | 3', 4', 7'     | 1', 3', 7'                                                           |
| 3'  | 66.6 (d)          | 3.74 (m)                          | 2', 4', 8'         | 1'             | 2', 5', 8'                                                           |
| 4'  | 73.3 (d)          | 3.49 (ddt, 11.8, 3.3, 1.2, 1.2)   | 3', 9'             | 3'             | 5', 6', 9'                                                           |
| 5'  | 67.4 (d)          | 3.85(br q, 6.6)                   | 6'                 | 1', 4', 6'     | 7 or 3', 8eq, 4', 7'                                                 |
| 6'  | 16.6 (q)          | 1.23 (d, 6.5)                     | 5'                 | 4', 5'         | 4', 5', 9'                                                           |
| 7'  | 59.6 (q)          | 3.45 (s)                          |                    | 2'             | 1', 2'                                                               |
|     | OH-3'             | 2.86 (d, 11.6)                    | 3'                 | 3'             | 2', 3', 4'                                                           |
|     | OH-4'             | 2.74 (d, 11.6)                    | 4'                 | 3', 4'         | 3', 4' <sup>a</sup> , 6'                                             |
| 1'' | 173.6 (s)         | -                                 |                    |                |                                                                      |
| 2'' | 36.3 (t)          | 2.35 (t, 7.5)                     | 3''                | 1'', 3'', 4''  | 3'' <sup>a</sup> , 4''                                               |
| 3'' | 18.8 (t)          | 1.67 (tq, 7.4, 7.4)               | 2'', 4''           | 1'', 2'', 4''  | 2'' <sup>a</sup> , 4'' <sup>a</sup>                                  |
| 4'' | 14.0 (q)          | 0.95 (t, 7.4)                     | 2'', 3''           | 2'', 3''       | 2'', 3'' <sup>a</sup>                                                |

Table S3. NMR data for mandelalide B (2) in pyridine-*d*<sub>5</sub>, 700 MHz

| No. | $\delta_C$ (mult) | $\delta_H$ (J in Hz)              | COSY          | HMBC          | ROESY                                                                  |
|-----|-------------------|-----------------------------------|---------------|---------------|------------------------------------------------------------------------|
| 1   | 176.4 (s)         | -                                 |               |               |                                                                        |
| 2   | 80.0 (s)          | -                                 |               |               |                                                                        |
| 3   | 70.2 (d)          | 6.17 (d, 6.8)                     | 4a            | 5, 1"         | 4a <sup>a</sup> , 4b, 5, 11, 23, 24b                                   |
| 4a  | 37.2 (t)          | 2.12 (ddd, 15.5, 6.7, 1.6)        | 3, 4b         | 3             | 3 <sup>a</sup> , 4b, 5, 6eq                                            |
| 4b  |                   | 2.96 (dd, 15, 11.6)               | 4a, 5         |               | 3, 4a <sup>a</sup> , 6ax                                               |
| 5   | 73.2 (d)          | 3.60 (ddt, 11.2, 11.2, 1.6)       | 4b, 6ax       |               | 3, 4a, 6eq, 7                                                          |
| 6ax | 37.9 (t)          | 1.22 (m)                          | 5, 6eq, 7     | 5 and/or 7    | 4b, 6eq                                                                |
| 6eq |                   | 2.00 (dd, 13.1, 4.5)              | 6ax, 7        |               | 4a, 5, 6ax, 7, 1'                                                      |
| 7   | 73.4 (d)          | 3.97 (m)                          | 6ax, 8ax      |               | 5, 6eq, 9, 1'                                                          |
| 8ax | 40.1 (t)          | 1.39 (ddd, 11.4, 11.3, 11.3)      | 7, 8eq, 9     | 7, 9          | 8eq, 10b                                                               |
| 8eq |                   | 2.03 (dd, 13.4, 4.5)              | 7, 8ax        |               | 7, 8ax, 9, 5'                                                          |
| 9   | 72.3 (d)          | 3.54 (dddd, 11.5, 11.2, 1.9, 1.9) | 8ax, 10b      |               | 7, 8eq, 10a, 25                                                        |
| 10a | 42.5 (t)          | 1.28 (m)                          | 10b, 11       |               | 8eq, 9, 10b, 11 <sup>a</sup>                                           |
| 10b |                   | 1.81 (ddd, 14.0, 11.3, 3.8)       | 9, 10a        |               | 8ax, 10a, 11                                                           |
| 11  | 34.5 (d)          | 3.10 (m)                          | 10a, 12, 25   |               | 3, 10b, 13, 23, 25                                                     |
| 12  | 141.8 (d)         | 5.54 (dd, 14.7, 9.9)              | 11, 13        |               | 10a, 14, 25                                                            |
| 13  | 123.9 (d)         | 6.75 (dd, 14.9, 11.3)             | 12, 14        |               | 14 <sup>a</sup> , 16b, 21                                              |
| 14  | 131.2 (d)         | 6.14 (dd, 10.8, 10.8)             | 13, 15        |               | 12, 13 <sup>a</sup> , 15                                               |
| 15  | 127.5 (d)         | 5.34 (ddd, 11.1, 11.1, 5.2)       | 14, 16a, 16b  |               | 14, 16a, 17                                                            |
| 16a | 30.8 (t)          | 1.75 (m)                          | 15, 16b       |               | 16b, 17, 26                                                            |
| 16b |                   | 2.29 (ddd, 11.7, 11.7, 11.7)      | 15, 16a, 17   |               | 13, 15 <sup>a</sup> , 16a <sup>a</sup> , 17 <sup>a</sup> , 19a, 21, 26 |
| 17  | 81.3 (d)          | 3.97 (m)                          | 18            | 20            | 15, 16a <sup>a</sup> , 16b <sup>a</sup> , 18                           |
| 18  | 38.4 (d)          | 2.33 (m)                          | 19a, 26       |               | 17, 19a <sup>a</sup> , 19b <sup>b</sup> , 26 <sup>a</sup>              |
| 19a | 35.6 (t)          | 1.29 (m)                          | 18, 19b, 21   |               | 18 <sup>a</sup> , 19b, 21                                              |
| 19b |                   | 1.88 (ddd, 12.9, 7.0, 7.0)        | 19a           | 17            | 18 <sup>b</sup> , 19a                                                  |
| 20  | 82.9 (d)          | 3.95 (m)                          | 19a, 19b, 21  |               | 19b, 21 <sup>a</sup> , 22a                                             |
| 21  | 74.9 (d)          | 4.14 (dd, 9.4, 9.4)               | 20, 22b       |               | 11, 13, 16b, 19a, 22a, 22b <sup>a</sup> , 23                           |
| 22a | 38.9 (t)          | 1.65 (m)                          | 22b, 23       |               | 20, 21, 22b <sup>a</sup> , 23 <sup>a</sup> , 24a <sup>b</sup>          |
| 22b |                   | 1.77 (m)                          | 21, 22a       |               | 20, 21 <sup>a</sup> , 22a <sup>a</sup> , 24a                           |
| 23  | 74.7 (d)          | 5.38 (dddd, 11.0, 10.8, 5.0, 0.9) | 22a, 24a, 24b |               | 3, 11, 21, 22a <sup>a</sup> , 22b <sup>a</sup> , 24b                   |
| 24a | 40.8 (t)          | 2.39 (dd, 11.5, 12.5)             | 23            | 2, 3, 23      | 22b, 24b                                                               |
| 24b |                   | 2.83 (dd, 12.8, 4.8)              | 23, 24a       | 1, 2, 3       | 3, 22b, 23, 24a                                                        |
| 25  | 18.8 (q)          | 1.46 (d, 6.6)                     | 11            | 10, 11, 12    | 9, 11 <sup>a</sup> , 12, 23                                            |
| 26  | 13.8 (q)          | 0.86 (d, 6.8)                     | 18            | 17, 18, 19    | 16a, 18 <sup>a</sup> , 19a <sup>a</sup>                                |
| 1'  | 95.9 (d)          | 5.37 (d, 1.2)                     |               | 7, 2', 3', 5' | 6eq, 7, 2', 7'                                                         |
| 2'  | 82.0 (d)          | 3.68 (ddd, 2.9, 1.1, 1.1)         | 3'            |               | 1', 3', 7'                                                             |
| 3'  | 67.4 (d)          | 4.25 (dd, 3.2, 2.8)               | 2', 4'        |               | 2', 4', 5'                                                             |
| 4'  | 74.0 (d)          | 3.92 (br s)                       |               |               | 3', 5', 6'                                                             |
| 5'  | 68.1 (d)          | 4.10 (q, 6.6)                     | 6'            | 4'            | 8eq, 3', 4', 6'                                                        |
| 6'  | 17.2 (q)          | 1.51 (d, 6.7)                     | 5'            | 4', 5'        | 8eq, 4', 5'                                                            |
| 7'  | 59.5 (q)          | 3.46 (s)                          |               | 2'            | 2', 3'                                                                 |
| 1"  | 174.0 (s)         | -                                 |               |               |                                                                        |
| 2"  | 36.3 (t)          | 2.47 (m)                          | 3"            | 1", 3", 4"    | 3" <sup>a</sup> , 4" <sup>a</sup>                                      |
| 3"  | 19.0 (t)          | 1.67 (m)                          | 2", 4"        | 1", 2", 4"    | 2" <sup>a</sup> , 1" <sup>a</sup>                                      |
| 4"  | 14.3 (q)          | 0.87 (t, 7.3)                     | 3"            | 2", 3"        | 2" <sup>a</sup> , 3" <sup>a</sup>                                      |

HMBC correlations are presented from proton to indicated carbon. a - COSY artifacts observed in ROESY spectrum. b- TOCSY artifacts observed in ROESY spectrum.

Table S4. NMR data for mandelalide C (**3**) in CDCl<sub>3</sub>, 700 MHz

| No. | $\delta_C$ (mult) | $\delta_H$ ( <i>J</i> in Hz)      | COSY               | HMBC             | TOCSY                                      | ROESY                                                                        |
|-----|-------------------|-----------------------------------|--------------------|------------------|--------------------------------------------|------------------------------------------------------------------------------|
| 1   | 174.7 (s)         | -                                 |                    |                  |                                            |                                                                              |
| 2   | 82.0 (s)          | -                                 |                    |                  |                                            |                                                                              |
| 3   | 68.3 (d)          | 5.51 (dd, 6.6, 0.88)              | 4a, 4b             | 1, 2, 4, 5       | 4a, 4b, 5, 6ax, 6eq                        | 4a <sup>a</sup> , 4b, 5, 9, 23, 24                                           |
| 4a  | 36.4 (t)          | 1.65 (m)                          | 3, 4b              | 3                | 3, 4b, 5, 6ax, 6eq, 7                      | 3 <sup>a</sup> , 4b <sup>a</sup> , 5, 6ax                                    |
| 4b  |                   | 2.14 (ddd, 15.6, 11.7, 1.0)       | 3, 4a, 5           | 2, 5, 6          | 3, 4a, 5, 6ax, 6eq, 7                      | 3, 4a <sup>a</sup> , 5 <sup>a</sup> , 6ax, 6eq                               |
| 5   | 72.3 (d)          | 3.25 (dddd, 11.4, 11.4, 1.8, 1.8) | 4a, 4b, 6ax, 6eq   | 4, 7, 9          | 3, 4a, 4b, 6ax, 6eq, 7, 9                  | 3, 4a, 4b <sup>a</sup> , 6ax <sup>a</sup> , 6eq, 7, 9                        |
| 6ax | 41.2 (t)          | 1.11 (ddd, 12.5, 11.4, 11.4)      | 5, 6eq, 7          | 4, 5, 7          | 4a, 4b, 5, 6eq, 7, 8eq                     | 4a, 4b, 5 <sup>c</sup> , 7, 8eq <sup>b</sup>                                 |
| 6eq |                   | 1.86 (m)                          | 6ax, 7             | 7, 8             | 4a, 4b, 5, 6ax, 7                          | 4a, 4b, 5, 7, 8ax <sup>b</sup>                                               |
| 7   | 68.3 (d)          | 3.76 (dddd, 10.9, 10.9, 4.6, 4.1) | 6ax, 6eq, 8ax, 8eq | 8, 9             | 4a, 4b, 5, 6ax, 8ax, 8eq, 9, 10b           | 5, 6ax, 6eq, 8ax, 8eq, 9                                                     |
| 8ax | 41.8 (t)          | 1.13 (ddd, 12.5, 11.2, 11.2)      | 7, 8eq, 9          | 6, 7, 9, 10      | 7, 8eq, 9, 10b, 11                         | 6eq <sup>b</sup> , 7, 9 <sup>a</sup> , 10b                                   |
| 8eq |                   | 1.83 (m)                          | 7, 8ax             | 6, 7             | 8ax, 9, 10a, 10b                           | 6ax <sup>b</sup> , 9                                                         |
| 9   | 72.3 (d)          | 3.37 (dddd, 10.9, 10.9, 2.1, 2.1) | 8ax, 8eq, 10a, 10b | 5, 7, 10         | 7, 8ax, 8eq, 10a, 10b, 11, 25              | 3, 5, 7, 8eq, 10a <sup>a</sup> , 10b <sup>a</sup> , 11, 25                   |
| 10a | 42.1 (t)          | 1.19 (ddd, 14.2, 12.1, 2.8)       | 9, 10b, 11         | 11, 12, 25       | 7, 8eq, 9, 10b, 11, 12, 13, 14, 25         | 9, 10b <sup>a</sup> , 11 <sup>a</sup> , 12                                   |
| 10b |                   | 1.57 (m)                          | 9, 10a, 11         | 8, 9, 11, 12, 25 | 8ax, 9, 10a, 11, 12, 13, 25                | 9 <sup>a</sup> , 10a <sup>a</sup> , 11, 12                                   |
| 11  | 34.0 (t)          | 2.49 (m)                          | 10a, 10b, 12, 25   | 10, 12, 13, 25   | 9, 10a, 10b, 12, 13, 14, 25                | 9, 10a <sup>a</sup> , 10b, 12 <sup>a</sup> , 13, 14, 21, 23, 25 <sup>a</sup> |
| 12  | 142.2 (d)         | 5.50 (dd, 14.6, 9.6)              | 11, 13             | 10, 11, 14, 25   | 10a, 10b, 11, 13, 14, 15, 16a, 16b, 17, 25 | 10a, 11 <sup>a</sup> , 13 <sup>a</sup> , 14 <sup>a</sup> , 25                |
| 13  | 123.2 (d)         | 6.39 (dd, 14.6, 11.4)             | 12, 14             | 11, 14, 15       | 10a, 10b, 11, 12, 14, 15, 16a, 16b, 17, 25 | 11, 12 <sup>a</sup> , 14 <sup>a</sup> , 15 <sup>a</sup> , 16b, 21            |
| 14  | 131.1 (d)         | 6.10 (dd, 11.0, 11.0)             | 13, 15, 16a        | 12, 13, 16, 17   | 10a, 11, 12, 13, 15, 16a, 16b, 17, 25      | 11, 12 <sup>a</sup> , 13 <sup>b</sup> , 15 <sup>a</sup> , 16a, 16b, 21       |
| 15  | 127.1 (d)         | 5.28 (ddd, 11.0, 11.0, 5.4)       | 14, 16a, 16b       | 13, 16, 17       | 12, 13, 14, 16a, 16b, 17, 18               | 13 <sup>a</sup> , 14 <sup>a</sup> , 16a, 16b <sup>a</sup> , 17               |
| 16a | 30.7 (t)          | 1.90 (ddd, 13.6, 5.2, 1.1)        | 15, 16b            | 14, 15, 17       | 12, 13, 14, 15, 16b, 17, 18, 19a, 26       | 14, 15, 16b, 17 <sup>a</sup> , 26                                            |
| 16b |                   | 2.30 (ddd, 13.8, 11.9, 11.9)      | 15, 16a, 17        | 14, 15, 17, 18   | 12, 13, 14, 15, 16a, 17, 18, 26            | 13, 15 <sup>a</sup> , 16a, 17 <sup>a</sup> , 19a, 21, 26                     |
| 17  | 81.6 (d)          | 3.95 (ddd, 11.5, 7.5, 1.1)        | 16b, 18            | 15, 19, 20       | 14, 15, 16a, 16b, 18, 19a, 19b, 20, 21     | 15, 16a <sup>a</sup> , 16b <sup>a</sup> , 18, 26                             |
| 18  | 38.3 (d)          | 2.53 (m)                          | 17, 19a, 19b, 26   | 16, 17, 19, 26   | 15, 16a, 16b, 17, 19a, 19b, 20, 21, 26     | 17, 19a <sup>a</sup> , 19b, 20, 26 <sup>a</sup>                              |
| 19a | 35.7 (t)          | 1.33 (ddd, 12.2, 12.2, 9.1)       | 18, 19b, 20        | 18, 20, 21, 26   | 16b, 17, 18, 19b, 20, 21, 22a, 22b, 26     | 16b, 18, 19b, 20 <sup>a</sup> , 21, 22b, 26                                  |
| 19b |                   | 2.10 (ddd, 12.5, 7.0, 6.8)        | 18, 19a, 20        | 17, 18, 21       | 16b, 17, 18, 19a, 20, 21, 22a, 26          | 18, 19a, 20, 22b, 26                                                         |
| 20  | 82.4 (d)          | 3.82 (ddd, 9.2, 9.2, 7.0)         | 19a, 19b, 21       | 17, 21, 22       | 17, 18, 19a, 19b, 21, 22a, 22b, 23, 26     | 18, 19a <sup>a</sup> , 19b, 22a, 22b                                         |
| 21  | 74.4 (d)          | 3.73 (ddd, 10.8, 9.5, 1.2)        | 20, 22a            | 19, 20, 22, 23   | 17, 18, 19a, 19b, 20, 22a, 22b, 23, 26     | 11, 13, 14, 16b, 19a, 22a <sup>a</sup> , 23, 27                              |
| 22a | 32.1 (t)          | 1.59 (m)                          | 21, 22b            | 20, 21           | 19a, 19b, 20, 21, 22b, 23                  | 20, 21 <sup>a</sup> , 22b <sup>a</sup> , 23, 24                              |
| 22b |                   | 1.82 (ddd, 14.4, 11.0, 1.0)       | 22a, 23            | 20, 23           | 19a, 20, 21, 22a, 23, 24                   | 19a, 19b, 20, 22a <sup>a</sup> , 23 <sup>a</sup>                             |
| 23  | 78.9 (d)          | 5.01 (ddd, 11.2, 2.0, 2.0)        | 22b, 24            | 21, 22, 24       | 20, 21, 22a, 22b, 24                       | 3, 11, 21, 22a <sup>a</sup> , 22b <sup>a</sup> , 24 <sup>a</sup> , 25        |
| 24  | 72.2 (d)          | 3.98 (d, 2.8)                     | 23                 | 1, 2, 3, 23      | 22a, 22b, 23                               | 3, 23 <sup>a</sup>                                                           |
| 25  | 18.4 (q)          | 1.06 (d, 6.2)                     | 11                 | 10, 11, 12       | 9, 10a, 10b, 11, 12, 13, 14,               |                                                                              |
| 26  | 14.2 (q)          | 1.03 (d, 6.9)                     | 18                 | 17, 18, 19       | 16a, 16b, 17, 18, 19a, 19b, 20, 21         |                                                                              |
| 27  | OH                | 2.80 (br s)                       | 21, 22b            |                  | 22a                                        | 21                                                                           |
| 1'  | 173.4 (s)         | -                                 |                    |                  |                                            |                                                                              |
| 2'  | 36.3 (t)          | 2.34 (td, 7.5, 1.2)               | 3'                 | 1', 3', 4'       | 3', 4'                                     | 3', 4'                                                                       |
| 3'  | 18.7 (t)          | 1.65 (m)                          | 2', 3'             | 1', 2', 4'       | 2', 4'                                     | 2', 4'                                                                       |
| 4'  | 13.9 (q)          | 0.94 (t, 7.5)                     | 3'                 | 2', 3'           | 2', 3'                                     |                                                                              |

HMBC correlations are presented from proton to indicated carbon. a - COSY artifacts observed in ROESY spectrum. b - TOCSY artifacts observed in ROESY spectrum.

Table S5. NMR data for mandelalide D (**4**) in CDCl<sub>3</sub>, 700 MHz

| No. | $\delta_C$ (mult) | $\delta_H$ (J in Hz)              | COSY               | HMBC             | TOCSY                                  | ROESY                                                                                |
|-----|-------------------|-----------------------------------|--------------------|------------------|----------------------------------------|--------------------------------------------------------------------------------------|
| 1   | 172.9 (s)         | -                                 |                    |                  |                                        |                                                                                      |
| 2   | 81.3 (s)          | -                                 |                    |                  |                                        |                                                                                      |
| 3   | 68.6 (d)          | 5.56 (dd,6.6, 0.7)                | 4a, 4b             | 2, 4, 5, 24, 1'  | 4a, 4b, 5, 6ax, 6eq                    | 4a <sup>a</sup> , 4b, 5, 9, 11, 24, 25                                               |
| 4a  | 36.2 (t)          | 1.68 (m)                          | 3, 4b              | 3                | 3, 4b, 5, 6ax, 6eq                     | 3 <sup>a</sup> , 4b <sup>a</sup> , 5, 6ax                                            |
| 4b  |                   | 2.18 (ddd, 15.4, 11.5, 0.9)       | 3, 4a, 5           | 2, 5, 6          | 3, 4a, 5, 6ax, 6eq, 7                  | 3, 4a <sup>a</sup> , 5 <sup>a</sup> , 6ax, 6eq                                       |
| 5   | 72.2 (d)          | 3.21 (dddd, 11.2, 11.2, 1.3, 1.3) | 4a, 4b, 6ax, 6eq   | 4, 7, 9          | 3, 4a, 4b, 6ax, 6eq, 7                 | 3, 4a, 4b <sup>a</sup> , 6ax <sup>a</sup> , 6eq, 7, 9                                |
| 6ax | 41.2 (t)          | 1.12 (ddd, 11.3, 11.3, 11.3)      | 5, 6eq, 7          | 4, 5, 7, 8       | 4a, 4b, 5, 7                           | 6eq <sup>b</sup> , 4b, 7 <sup>a</sup> , 5 <sup>a</sup>                               |
| 6eq |                   | 1.85 (dddd, 12.2, 4.6, 1.5, 1.5)  | 5, 6ax, 7          | 7, 8             | 4a, 4b, 5, 6ax, 7                      | 4a, 4b, 5, 6ax <sup>b</sup> , 7                                                      |
| 7   | 68.4 (d)          | 3.75 (m)                          | 6ax, 6eq, 8ax, 8eq |                  | 4b, 5, 6ax, 6eq, 8ax, 8eq, 9, 10b      | 5, 6ax <sup>a</sup> , 6eq, 8ax <sup>a</sup> , 8eq, 9                                 |
| 8ax | 41.8 (t)          | 1.12 (ddd, 11.3, 11.3, 11.3)      | 7, 8eq, 9          | 6, 7             | 7, 8eq, 9, 10a, 10b                    | 7 <sup>a</sup> , 8eq <sup>b</sup> , 9 <sup>a</sup> , 10b                             |
| 8eq |                   | 1.83 (dddd, 12.2, 4.6, 1.5, 1.5)  | 7, 8ax, 9          | 6, 7             | 9, 10a, 10b                            | 8ax <sup>b</sup> , 9, 10b                                                            |
| 9   | 72.2 (d)          | 3.36 (dddd, 11.0, 11.0, 2.2, 2.2) | 8ax, 8eq, 10a, 10b | 7, 10            | 7, 8ax, 8eq, 10a, 10b, 11, 25          | 5, 7, 8eq, 10a <sup>a</sup> , 10b <sup>a</sup> , 11, 25                              |
| 10a | 42.1 (t)          | 1.19 (ddd, 13.9, 11.5, 2.8)       | 9, 10b, 11         | 11, 12           | 8eq, 9, 10b, 11, 25                    | 9, 10b <sup>a</sup> , 11 <sup>a</sup>                                                |
| 10b |                   | 1.57 (ddd, 14.0, 11.5, 4.0)       | 9, 10a, 11         | 8, 9, 11, 25     | 7, 8eq, 9, 10a, 11, 25                 | 8eq, 9 <sup>a</sup> , 10a <sup>a</sup> , 11                                          |
| 11  | 34.2 (d)          | 2.48 (m)                          | 10a, 10b, 12, 25   | 10, 12, 13       | 8ax, 9, 10a, 10b, 12, 13, 25           | 3, 9, 10a <sup>a</sup> , 10b, 12 <sup>a</sup> , 13, 14, 21, 23, 25 <sup>a</sup>      |
| 12  | 142.3 (d)         | 5.50 (dd, 14.8, 9.7)              | 11, 13             | 10, 11, 14, 25   | 10a, 10b, 11, 13, 14, 15, 16a, 16b, 25 | 10a, 10b, 11 <sup>a</sup> , 13 <sup>a</sup> , 14 <sup>a</sup> , 15 <sup>a</sup> , 25 |
| 13  | 123.1 (d)         | 6.38 (dd, 15.0, 11.3)             | 12, 14             | 11, 14, 15       | 10a, 10b, 11, 12, 14, 15, 16a, 16b, 25 | 11, 12 <sup>a</sup> , 14 <sup>b</sup> , 15 <sup>a</sup> , 16b, 21, 28                |
| 14  | 131.1 (d)         | 6.10 (dd, 11.0, 11.0)             | 13, 15, 16a        | 12, 13, 16, 17   | 10a, 11, 12, 13, 15, 16a, 16b, 17, 25  | 11, 12 <sup>a</sup> , 13 <sup>a</sup> , 15 <sup>a</sup> , 16a, 16b, 21               |
| 15  | 127.1 (d)         | 5.28 (ddd, 11.3, 11.3, 5.4)       | 14, 16a, 16b       | 13, 16, 17       | 12, 13, 14, 16a, 16b, 17, 18           | 12 <sup>a</sup> , 13 <sup>a</sup> , 14 <sup>a</sup> , 16a, 16b <sup>a</sup> , 17     |
| 16a | 30.6 (t)          | 1.90 (ddd, 13.6, 5.3, 1.0)        | 15, 16b, 17        | 14, 15, 17       | 12, 13, 14, 15, 16b, 17                | 14, 15, 16b, 17 <sup>a</sup> , 26                                                    |
| 16b |                   | 2.29 (ddd, 13.1, 11.3, 11.3)      | 15, 16a, 17        | 14, 15, 17, 18   | 12, 13, 14, 15, 16a, 17                | 13, 15 <sup>a</sup> , 16a, 17 <sup>a</sup> , 19a, 21, 26                             |
| 17  | 81.6 (d)          | 3.94 (ddd, 12.0, 7.5, 1.1)        | 16a, 16b, 18       | 15, 19, 20       | 14, 15, 16a, 16b, 18, 19a, 19b, 26     | 15, 16a <sup>a</sup> , 16b <sup>a</sup> , 18, 26                                     |
| 18  | 38.3 (d)          | 2.54 (dddq, 12.3, 7.5, 7.02, 6.8) | 17, 19a, 19b, 26   | 16, 17, 19, 26   | 16a, 17, 19a, 19b, 20, 21, 26          | 17, 19a <sup>a</sup> , 19b, 20, 26                                                   |
| 19a | 35.7 (t)          | 1.34 (ddd, 12.3, 12.3, 9.2)       | 18, 19b, 20        | 18, 20, 21, 26   | 18, 19b, 20, 21, 26                    | 16b, 18 <sup>a</sup> , 19b, 21, 26                                                   |
| 19b |                   | 2.08 (ddd, 12.2, 7.02, 7.02)      | 18, 19a, 20        | 17, 18, 21       | 17, 18, 19a, 20, 21, 22a, 26           | 18, 19a, 20, 22a, 22b, 26                                                            |
| 20  | 82.2 (d)          | 3.79 (ddd, 9.3, 9.3, 7.0)         | 19a, 19b, 21       | 17, 21, 22       | 17, 18, 19a, 19b, 21, 22a, 22b, 23, 26 | 16b, 19a <sup>a</sup> , 19b, 18, 22a, 22b, 28                                        |
| 21  | 74.3 (d)          | 3.73 (ddd, 10.0, 10.0, 1.6)       | 20, 22a, 28        | 19, 20, 22, 23   | 18, 19a, 19b, 20, 22a, 22b, 23, 26     | 11, 13, 14, 16b, 19a, 19b, 22a <sup>a</sup> , 22b <sup>a</sup> ,<br>23, 28           |
| 22a | 32.5 (t)          | 1.47 (ddd, 14.2, 10.5, 1.0)       | 21, 22b, 23        | 20, 21,          | 19b, 20, 21, 23, 28                    | 20, 21 <sup>a</sup> , 22b <sup>b</sup> , 23                                          |
| 22b |                   | 1.65 (m)                          | 22a, 23, 28        | 23               | 21, 22a, 23, 28                        | 19a, 20, 21 <sup>a</sup> , 22a, 23 <sup>a</sup>                                      |
| 23  | 76.7 (d)          | 5.13 (ddd, 10.8, 3.3, 0.8)        | 22a, 22b           | 22, 24           | 20, 21, 22a, 22b, 24                   | 3, 11, 21, 22b <sup>a</sup> , 23 <sup>a</sup> , 25, 28                               |
| 24  | 74.0 (d)          | 5.17 (d, 3.3)                     |                    | 1, 2, 3, 23, 1'' | 21, 22a, 22b, 23                       | 3, 22a, 3''                                                                          |
| 25  | 18.3 (q)          | 1.07 (d, 6.6)                     | 11                 | 10, 11, 12       | 9, 10a, 10b, 11                        | 9, 11 <sup>a</sup> , 12 <sup>a</sup> , 23, 28                                        |
| 26  | 14.3 (q)          | 1.04 (d, 6.8)                     | 18                 | 17, 18, 19       | 17, 18, 19a, 19b, 20                   | 16a, 16b, 18 <sup>a</sup> , 19a, 19b                                                 |
| 27  | OH                | 2.71 (br s)                       |                    | 1, 2, 3          |                                        | 4b, 22b                                                                              |
| 28  | OH                | 2.78 (br s)                       | 21, 22b            | 21, 22           | 20, 21, 22a, 22b, 23                   | 11, 13, 20, 21, 22b, 23, 25                                                          |
| 1'  | 173.6 (s)         | -                                 |                    |                  |                                        |                                                                                      |



|      |           |                      |          |               |          |                                       |
|------|-----------|----------------------|----------|---------------|----------|---------------------------------------|
| 2'a  | 36.3 (t)  | 2.40 (dt, 15.5, 7.3) | 3'       | 1', 3', 4'    | 3', 4'   | 3' <sup>ra</sup> , 4'                 |
| 2'b  |           | 2.43 (dt, 15.5, 7.3) | 3'       | 1', 3', 4'    | 3', 4'   | 3' <sup>ra</sup> , 4'                 |
| 3'   | 18.6 (t)  | 1.70 (m)             | 2', 4'   | 1', 2', 4'    | 2', 4'   | 2', 4'                                |
| 4'   | 13.9 (q)  | 0.96 (t, 7.4)        | 3'       | 2', 3'        | 2', 3'   | 2' <sup>ra</sup> , 3' <sup>ra</sup>   |
| 1''  | 173.1 (s) | -                    |          |               |          |                                       |
| 2''a | 36.0 (t)  | 2.31 (dt, 12.8, 7.5) | 3''      | 1'', 3'', 4'' | 3'', 4'' | 3'' <sup>ra</sup> , 4'' <sup>ra</sup> |
| 2''b |           | 2.33 (dt, 12.8, 7.5) | 3''      | 1'', 3'', 4'' | 3'', 4'' | 3'' <sup>ra</sup> , 4'' <sup>ra</sup> |
| 3''  | 18.6 (t)  | 1.63 (m)             | 2'', 4'' | 1'', 2'', 4'' | 2'', 4'' | 2'' <sup>ra</sup> , 4'' <sup>ra</sup> |
| 4''  | 13.8 (q)  | 0.93 (t, 7.3)        | 3''      | 2'', 3''      | 2'', 3'' | 2'' <sup>ra</sup> , 3'' <sup>ra</sup> |

---

HMBC correlations are presented from proton to indicated carbon. a - COSY artifacts observed in ROESY spectrum. b- TOCSY artifacts observed in ROESY spectrum

Table S6. NMR data for deacylmandelalide D (**4b**) in CD<sub>3</sub>OD, 700 MHz

| No. | $\delta_C$ (mult) | $\delta_H$ ( <i>J</i> in Hz)     | COSY         | HMBC           |
|-----|-------------------|----------------------------------|--------------|----------------|
| 1   | 176.3 (s)         | -                                |              |                |
| 2   | 82.4 (s)          | -                                |              |                |
| 3   | 66.6 (d)          | 4.06 (d, 7.5)                    | 4a           | 2, 4, 5        |
| 4a  | 37.4 (t)          | 1.56 (ddd, 15.1, 7.7, 1.6)       | 3, 4b        | 3              |
| 4b  |                   | 2.02 (dd, 15.2, 11.1)            | 4a, 5        | 5              |
| 5   | 72.3 (d)          | 3.39 (m)                         | 4b, 6ax      |                |
| 6ax | 40.3 (t)          | 1.11 (m)                         | 5, 6eq, 7    | 5, 7           |
| 6eq |                   | 1.88 (dddd, 12.1, 4.7, 1.6, 1.6) | 6ax, 7       |                |
| 7   | 67.1 (d)          | 3.76 (m)                         | 6ax, 8ax     |                |
| 8ax | 40.7 (t)          | 1.08 (m)                         | 7, 8eq, 9    | 7, 9           |
| 8eq |                   | 1.83 (m)                         | 7, 8ax       | 6, 7           |
| 9   | 71.1 (d)          | 3.39 (m)                         | 8ax, 10b     |                |
| 10a | 41.2 (t)          | 1.23 (m)                         | 10b, 11      |                |
| 10b |                   | 1.49 (ddd, 13.8, 11.4, 4.1)      | 9, 10a       | 25             |
| 11  | 33.5 (d)          | 2.49 (m)                         | 10a, 12, 25  |                |
| 12  | 140.7 (d)         | 5.51 (dd, 14.6, 9.9)             | 11, 13       | 11, 14, 25     |
| 13  | 122.8 (d)         | 6.42 (dd, 14.6, 11.2)            | 12, 14       | 11, 14, 15     |
| 14  | 130.0 (d)         | 6.10 (dd, 10.9, 10.9)            | 13, 15       | 12, 16         |
| 15  | 126.3 (d)         | 5.30 (ddd, 16.0, 10.9, 5.1)      | 14, 16a, 16b |                |
| 16a | 31.2 (t)          | 1.94 (ddd, 13.5, 5.2, 1.8)       | 15, 16b      | 14, 15         |
| 16b |                   | 2.38 (ddd, 13.1, 11.4, 11.4)     | 15, 16a, 17  | 17             |
| 17  | 81.0 (d)          | 3.98 (ddd, 11.6, 7.3, 1.4)       | 16b, 18      | 19, 20         |
| 18  | 37.6 (d)          | 2.52 (m)                         | 19a, 26      | 16, 17, 19     |
| 19a | 34.7 (t)          | 1.37 (m)                         | 18, 19b, 20  | 18, 20, 21, 26 |
| 19b |                   | 2.14 (m)                         | 18, 19a, 20  | 17, 18         |
| 20  | 82.2 (d)          | 3.84 (ddd, 9.6, 9.6, 6.8)        | 19a, 19b, 21 | 17             |
| 21  | 73.9 (d)          | 3.75 (dd, 9.1, 9.1)              | 20, 22a      | 20, 22, 23     |
| 22a | 32.0 (t)          | 1.52 (ddd, 13.7, 9.7, 1.0)       | 21, 22b      | 21             |
| 22b |                   | 1.81 (m)                         | 22a, 23      | 23             |
| 23  | 78.3 (d)          | 4.81 (dd, 10.8, 2.6)             | 22b          | 21             |
| 24  | 71.7 (d)          | 4.32 (d, 3.0)                    |              | 1, 2, 3, 23    |
| 25  | 17.0 (q)          | 1.01 (d, 6.6)                    | 11           | 10, 11, 12     |
| 26  | 12.3 (q)          | 1.08 (d, 7.0)                    | 18           | 17, 18, 19     |

Table S7. Cartesian coordinates for Mandelalide B (**2**) optimized at the B3LYP/6-31G\*\* level

DFT SCF Energy = -2422.75682693076 Hartree

Nuclear Repulsion Energy = 7278.259669929 Hartree

## Coordinates (Angstroms)

| Atom | x            | y             | z             |
|------|--------------|---------------|---------------|
| O1   | 4.2603010000 | -2.5090310000 | -3.8919780000 |
| C2   | 5.4921000000 | -3.1553510000 | -4.1534280000 |
| C3   | 5.9065350000 | -2.7349890000 | -5.5779810000 |
| C4   | 4.8551250000 | -1.7010620000 | -5.9991840000 |
| C5   | 4.1450410000 | -1.3468650000 | -4.6949830000 |
| H6   | 5.2947070000 | -4.2284800000 | -4.1608210000 |
| H7   | 5.8085390000 | -3.6011740000 | -6.2348340000 |
| H8   | 5.2902300000 | -0.8253530000 | -6.4822310000 |
| H9   | 4.1394480000 | -2.1750030000 | -6.6725190000 |
| H10  | 3.0795270000 | -1.1591190000 | -4.8335140000 |
| C11  | 7.3403140000 | -2.2094170000 | -5.7314900000 |
| H12  | 7.5005060000 | -1.3038990000 | -5.1492220000 |
| H13  | 8.0502310000 | -2.9738660000 | -5.4156310000 |
| H14  | 7.5243900000 | -1.9812690000 | -6.7817320000 |
| C15  | 6.5050990000 | -2.8948950000 | -3.0208610000 |
| H16  | 7.3787770000 | -3.5248630000 | -3.1887430000 |
| H17  | 6.8300270000 | -1.8615410000 | -3.0335270000 |
| C18  | 5.8832950000 | -2.5202570000 | -0.5464110000 |
| C19  | 5.9130350000 | -3.2835370000 | -1.6576280000 |
| H20  | 5.4303700000 | -2.9548830000 | 0.3334630000  |
| H21  | 5.4764260000 | -4.2691690000 | -1.5818570000 |
| C22  | 6.4730790000 | -0.4650450000 | 0.7335350000  |
| C23  | 6.4319710000 | -1.1481650000 | -0.4231570000 |
| H24  | 6.8451190000 | -0.6573700000 | -1.2895900000 |
| H25  | 6.0823110000 | -0.9111860000 | 1.6368840000  |
| C26  | 7.0800620000 | 0.9386180000  | 0.7922910000  |
| H27  | 6.7519190000 | 1.4543050000  | -0.1069880000 |
| H28  | 5.5242710000 | 1.7447210000  | 2.0819300000  |
| H29  | 7.0301540000 | 1.3358870000  | 2.9169450000  |
| C30  | 8.6095510000 | 0.7820480000  | 0.7501120000  |
| H31  | 9.0979750000 | 1.7340400000  | 0.5504420000  |
| H32  | 8.9691720000 | 0.3821350000  | 1.6986550000  |
| H33  | 8.8967310000 | 0.0981630000  | -0.0491100000 |
| C34  | 6.6123620000 | 1.7685370000  | 2.0070910000  |
| C35  | 7.4401720000 | 5.4674680000  | 2.8473030000  |
| C36  | 6.7842770000 | 4.1015830000  | 3.1002400000  |
| C37  | 7.0741340000 | 3.2316520000  | 1.8783250000  |
| O38  | 6.4258870000 | 3.8455050000  | 0.7784810000  |
| C39  | 7.0854880000 | 5.0321030000  | 0.3691780000  |
| C40  | 6.9679780000 | 6.0579050000  | 1.5080370000  |
| H41  | 8.5215120000 | 5.3290830000  | 2.8007760000  |
| H42  | 5.7071750000 | 4.2144470000  | 3.2327280000  |
| H43  | 7.2145560000 | 3.6484910000  | 3.9942100000  |
| H44  | 8.1556050000 | 3.2269890000  | 1.7580440000  |

|     |               |               |               |
|-----|---------------|---------------|---------------|
| H45 | 8.1233000000  | 4.7598270000  | 0.1692470000  |
| H46 | 5.9218790000  | 6.3492870000  | 1.6133850000  |
| H47 | 7.5562070000  | 6.9425530000  | 1.2624870000  |
| C48 | 6.4946120000  | 5.5845800000  | -0.9487620000 |
| H49 | 7.2490970000  | 6.2741550000  | -1.3334460000 |
| H50 | 5.6048290000  | 6.1743630000  | -0.7109100000 |
| C51 | 4.7769060000  | -0.1405550000 | -3.9879420000 |
| H52 | 5.8601000000  | -0.1758480000 | -4.0737160000 |
| C53 | 6.3248090000  | 4.4551510000  | -2.0184740000 |
| O54 | 4.4469060000  | -0.2338080000 | -2.6163950000 |
| H55 | 4.6587970000  | -1.1208970000 | -2.3167860000 |
| C56 | 4.2338850000  | 1.2098280000  | -4.4706190000 |
| H57 | 4.0717790000  | 1.3447660000  | -5.5404660000 |
| H58 | 3.2294530000  | 1.2751190000  | -4.0488200000 |
| C59 | 5.0671640000  | 2.3537740000  | -3.8750120000 |
| C60 | 4.1823820000  | 3.4498660000  | -3.3105310000 |
| C61 | 5.2571140000  | 4.5627870000  | -3.1696080000 |
| O62 | 5.9209090000  | 3.0409170000  | -4.8002070000 |
| H63 | 3.6110310000  | 3.0182540000  | -2.4779140000 |
| C64 | 5.9514030000  | 4.3529280000  | -4.5205460000 |
| O65 | 6.4402800000  | 5.2010360000  | -5.2155390000 |
| O66 | 4.6581330000  | 5.8410440000  | -3.1410170000 |
| H67 | 5.3285370000  | 6.4930330000  | -3.3589480000 |
| H68 | 6.1079330000  | 3.5556350000  | -1.4716360000 |
| H69 | 3.4680180000  | 3.7558000000  | -4.0779540000 |
| C70 | 7.4360010000  | 8.3850700000  | 5.2251610000  |
| C71 | 7.1381300000  | 7.7040160000  | 6.5673270000  |
| C72 | 8.3960890000  | 7.0364100000  | 7.1362580000  |
| C73 | 8.9842170000  | 6.0866910000  | 6.0841200000  |
| O74 | 9.2313590000  | 6.7736990000  | 4.8485060000  |
| C75 | 8.0598930000  | 7.3602560000  | 4.2644350000  |
| H76 | 6.4951730000  | 8.7472960000  | 4.8067130000  |
| H77 | 6.3817310000  | 6.9340950000  | 6.4096430000  |
| H78 | 8.1241140000  | 6.4616800000  | 8.0225830000  |
| O79 | 9.3626460000  | 8.0133770000  | 7.5208230000  |
| O80 | 6.6076980000  | 8.6469410000  | 7.4980090000  |
| H81 | 6.4519400000  | 8.1975450000  | 8.3317580000  |
| O82 | 8.3382360000  | 9.4820590000  | 5.4201970000  |
| H83 | 5.5615460000  | 1.9995990000  | -2.9736000000 |
| O84 | 7.6591310000  | 4.3860360000  | -2.5848680000 |
| C85 | 8.3214460000  | 3.2199760000  | -2.5601160000 |
| O86 | 7.9175960000  | 2.1732920000  | -2.1367200000 |
| C87 | 9.7047210000  | 3.4206050000  | -3.1746820000 |
| H88 | 10.0856900000 | 4.4042200000  | -2.8954360000 |
| H89 | 10.3839430000 | 2.6669820000  | -2.7742500000 |
| C90 | 9.6824510000  | 3.3113520000  | -4.7038510000 |
| H91 | 8.9778650000  | 4.0346010000  | -5.1150290000 |
| H92 | 10.6785320000 | 3.5436370000  | -5.0825420000 |
| C93 | 9.3019420000  | 1.9035050000  | -5.1727640000 |
| H94 | 10.0024750000 | 1.1750710000  | -4.7635760000 |
| H95 | 8.2921380000  | 1.6509450000  | -4.8508280000 |
| H96 | 9.3436350000  | 1.8637370000  | -6.2615100000 |
| H97 | 8.2731860000  | 5.2773300000  | 5.9132300000  |

|      |               |               |              |
|------|---------------|---------------|--------------|
| C98  | 10.2889390000 | 5.4516270000  | 6.5743490000 |
| H99  | 10.6356100000 | 4.7247570000  | 5.8391600000 |
| H100 | 11.0584960000 | 6.2125210000  | 6.7069530000 |
| H101 | 10.1179850000 | 4.9422050000  | 7.5230790000 |
| O102 | 7.1015820000  | 6.3535880000  | 3.9200930000 |
| H103 | 8.3658960000  | 7.8650270000  | 3.3486940000 |
| C104 | 8.1777980000  | 10.5392580000 | 4.4695040000 |
| H105 | 8.9290170000  | 11.3038250000 | 4.6670190000 |
| H106 | 8.3099400000  | 10.1713220000 | 3.4523840000 |
| H107 | 7.1881580000  | 10.9861830000 | 4.5696440000 |
| H108 | 9.5710420000  | 8.5477320000  | 6.7503060000 |

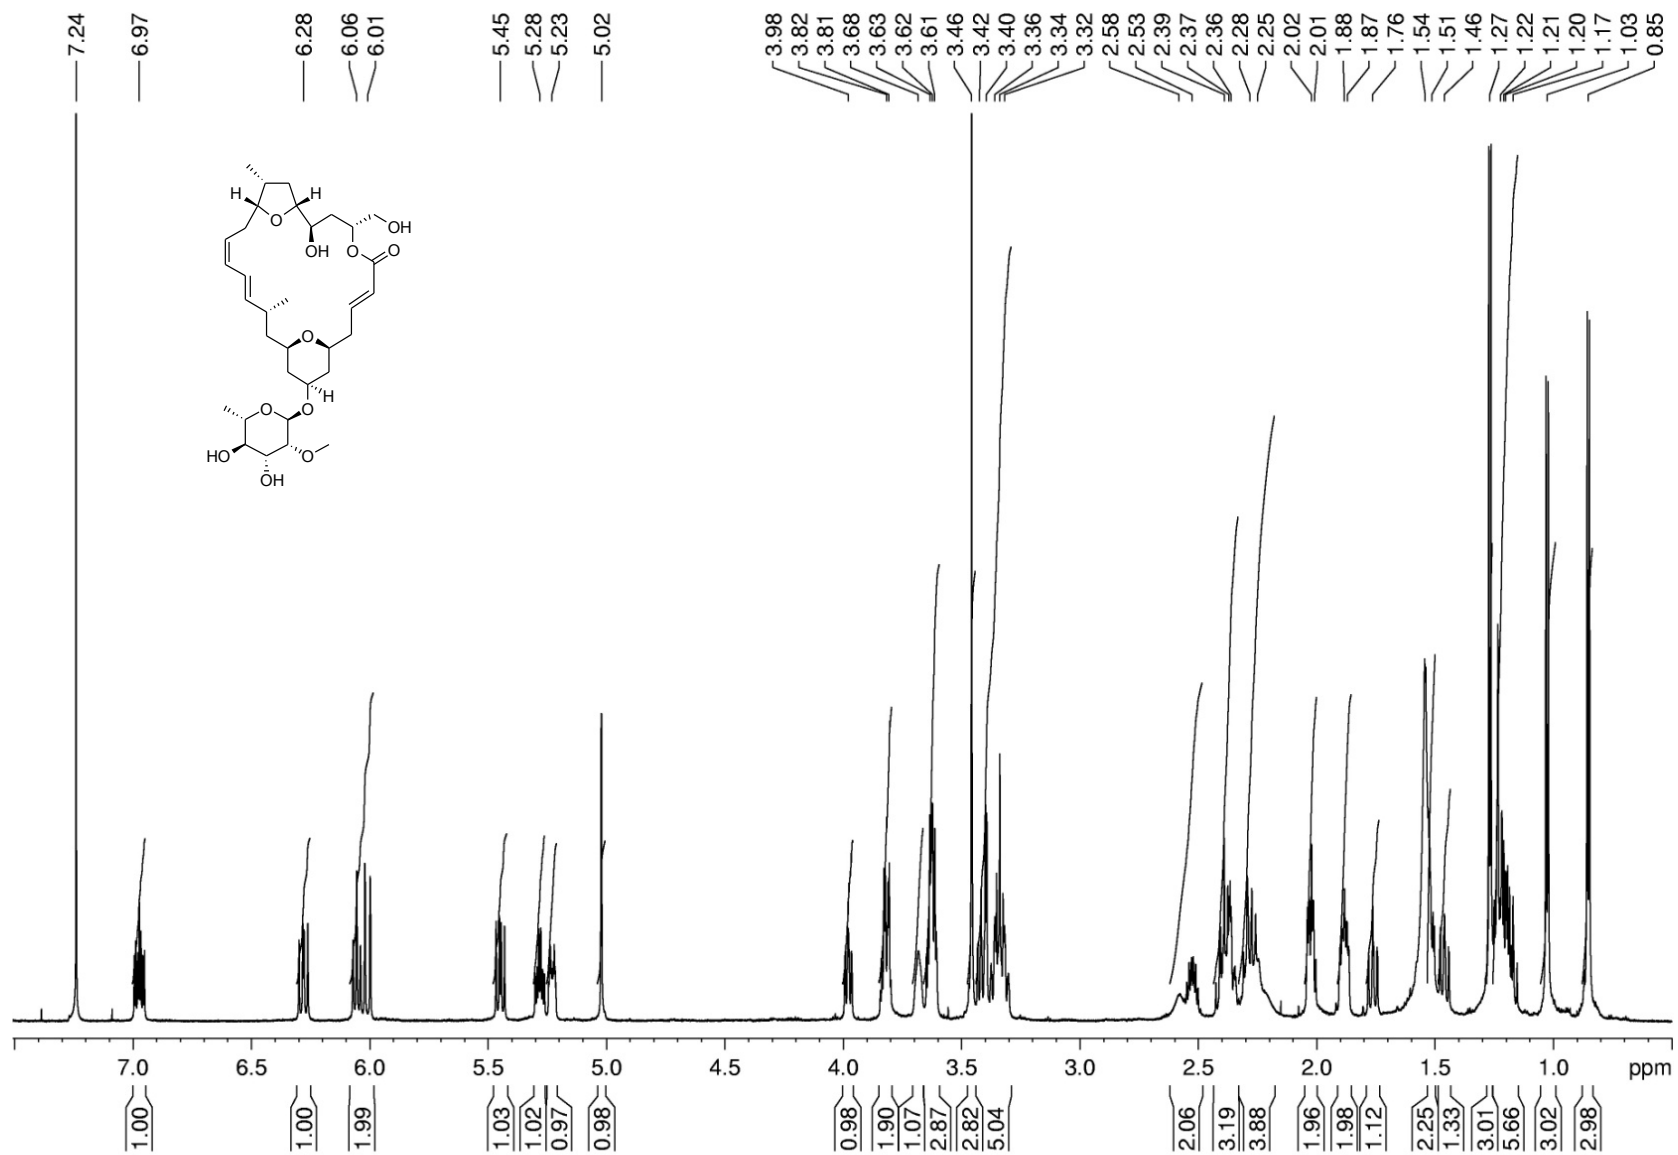

Figure S1. <sup>1</sup>H NMR spectrum for mandelalide A (1; 700 MHz, CDCl<sub>3</sub>)

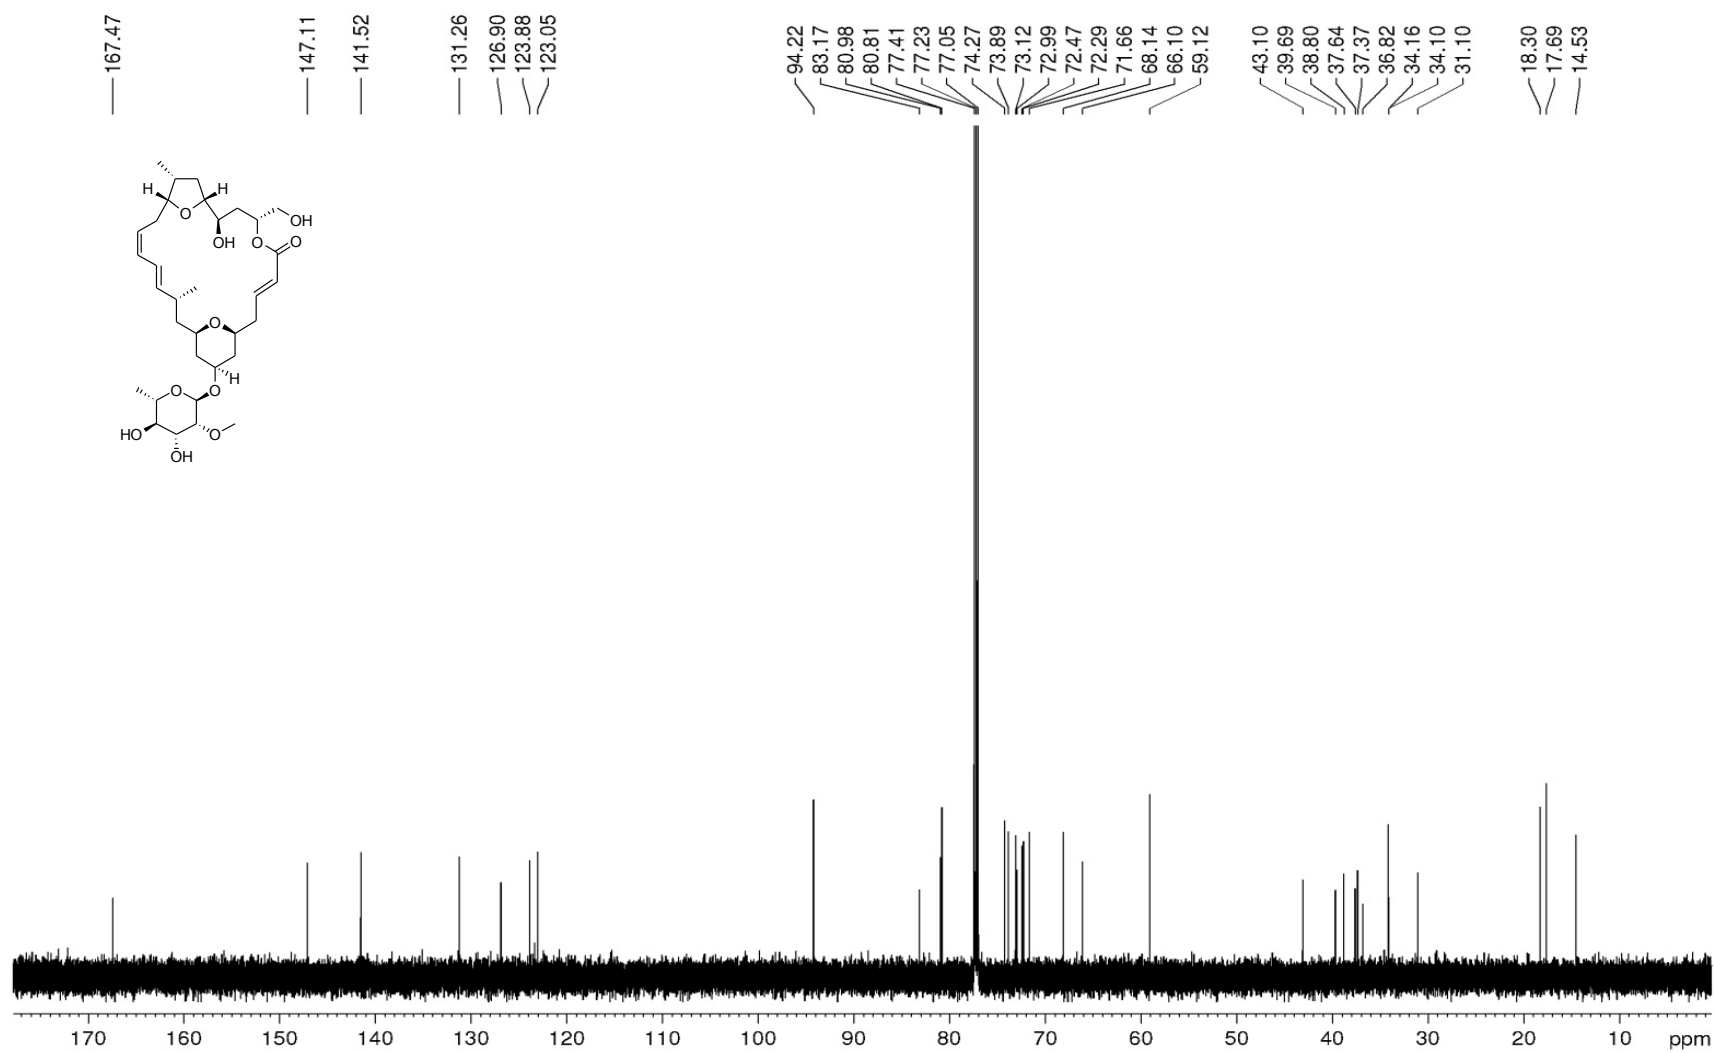

Figure S2. <sup>13</sup>C NMR spectrum for mandelalide A (1; 175 MHz, CDCl<sub>3</sub>)

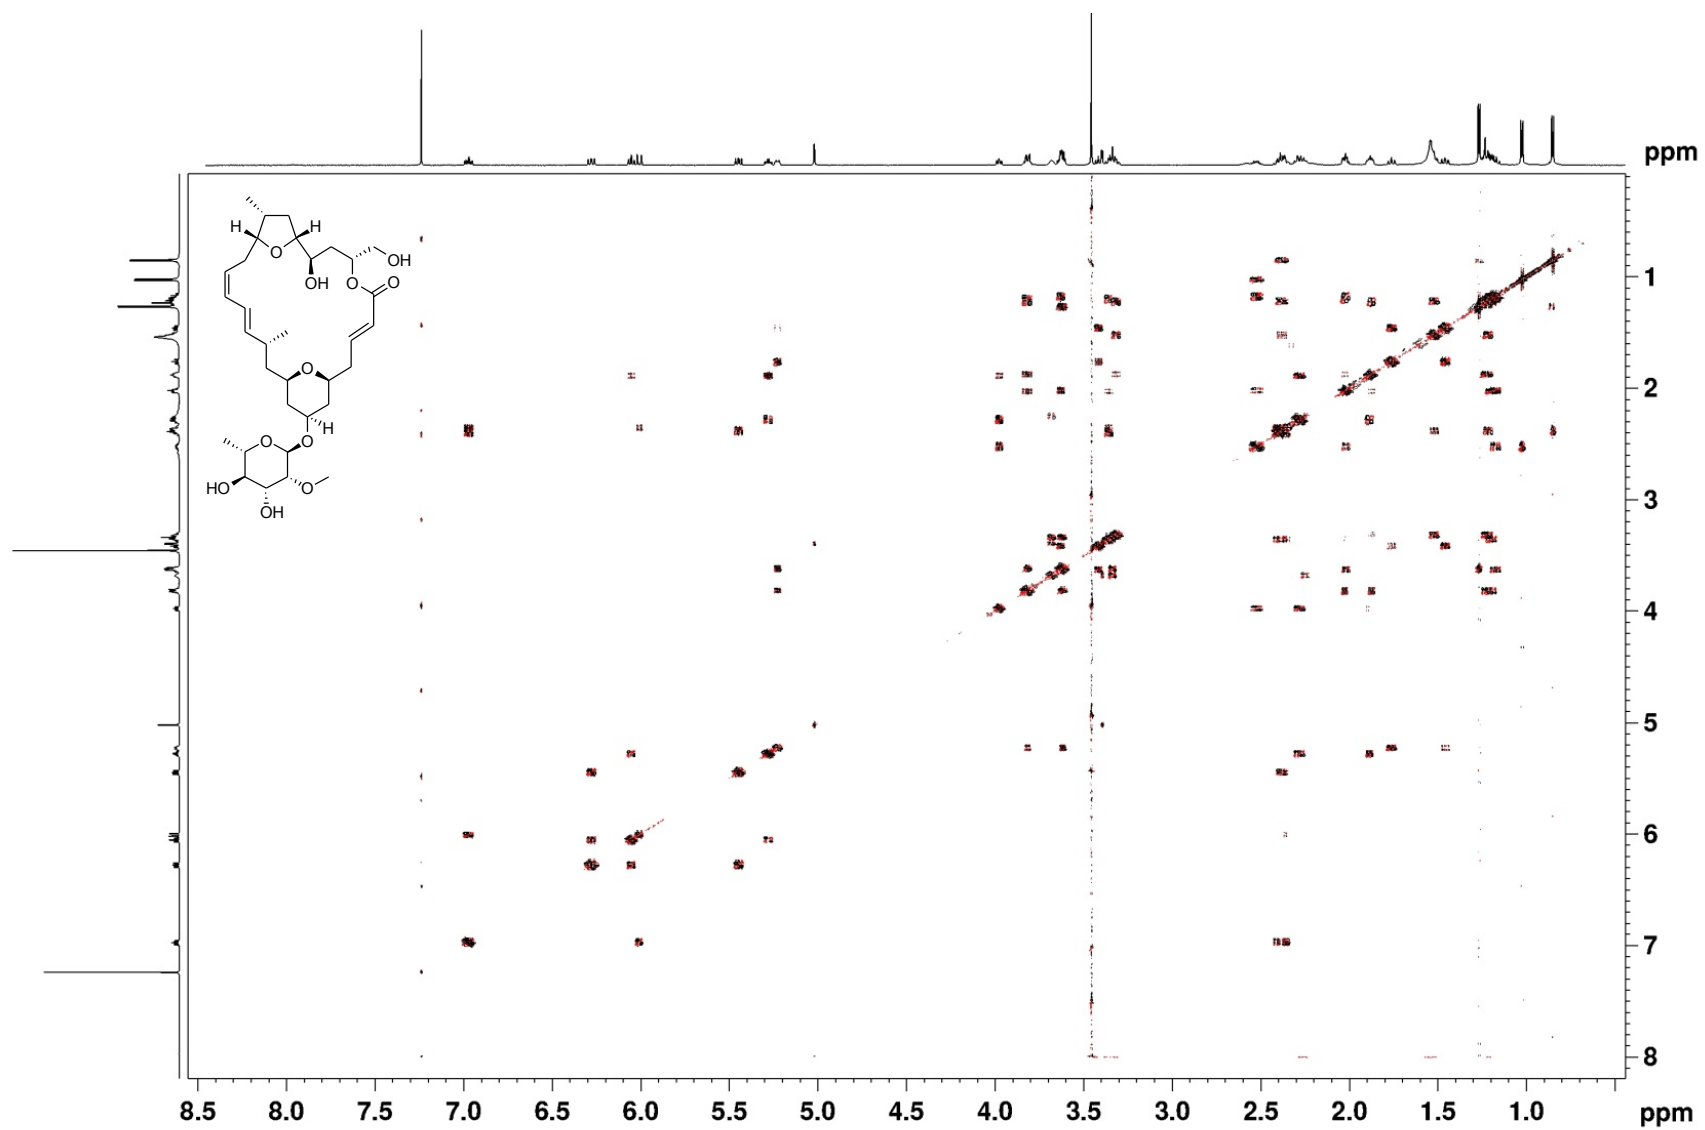



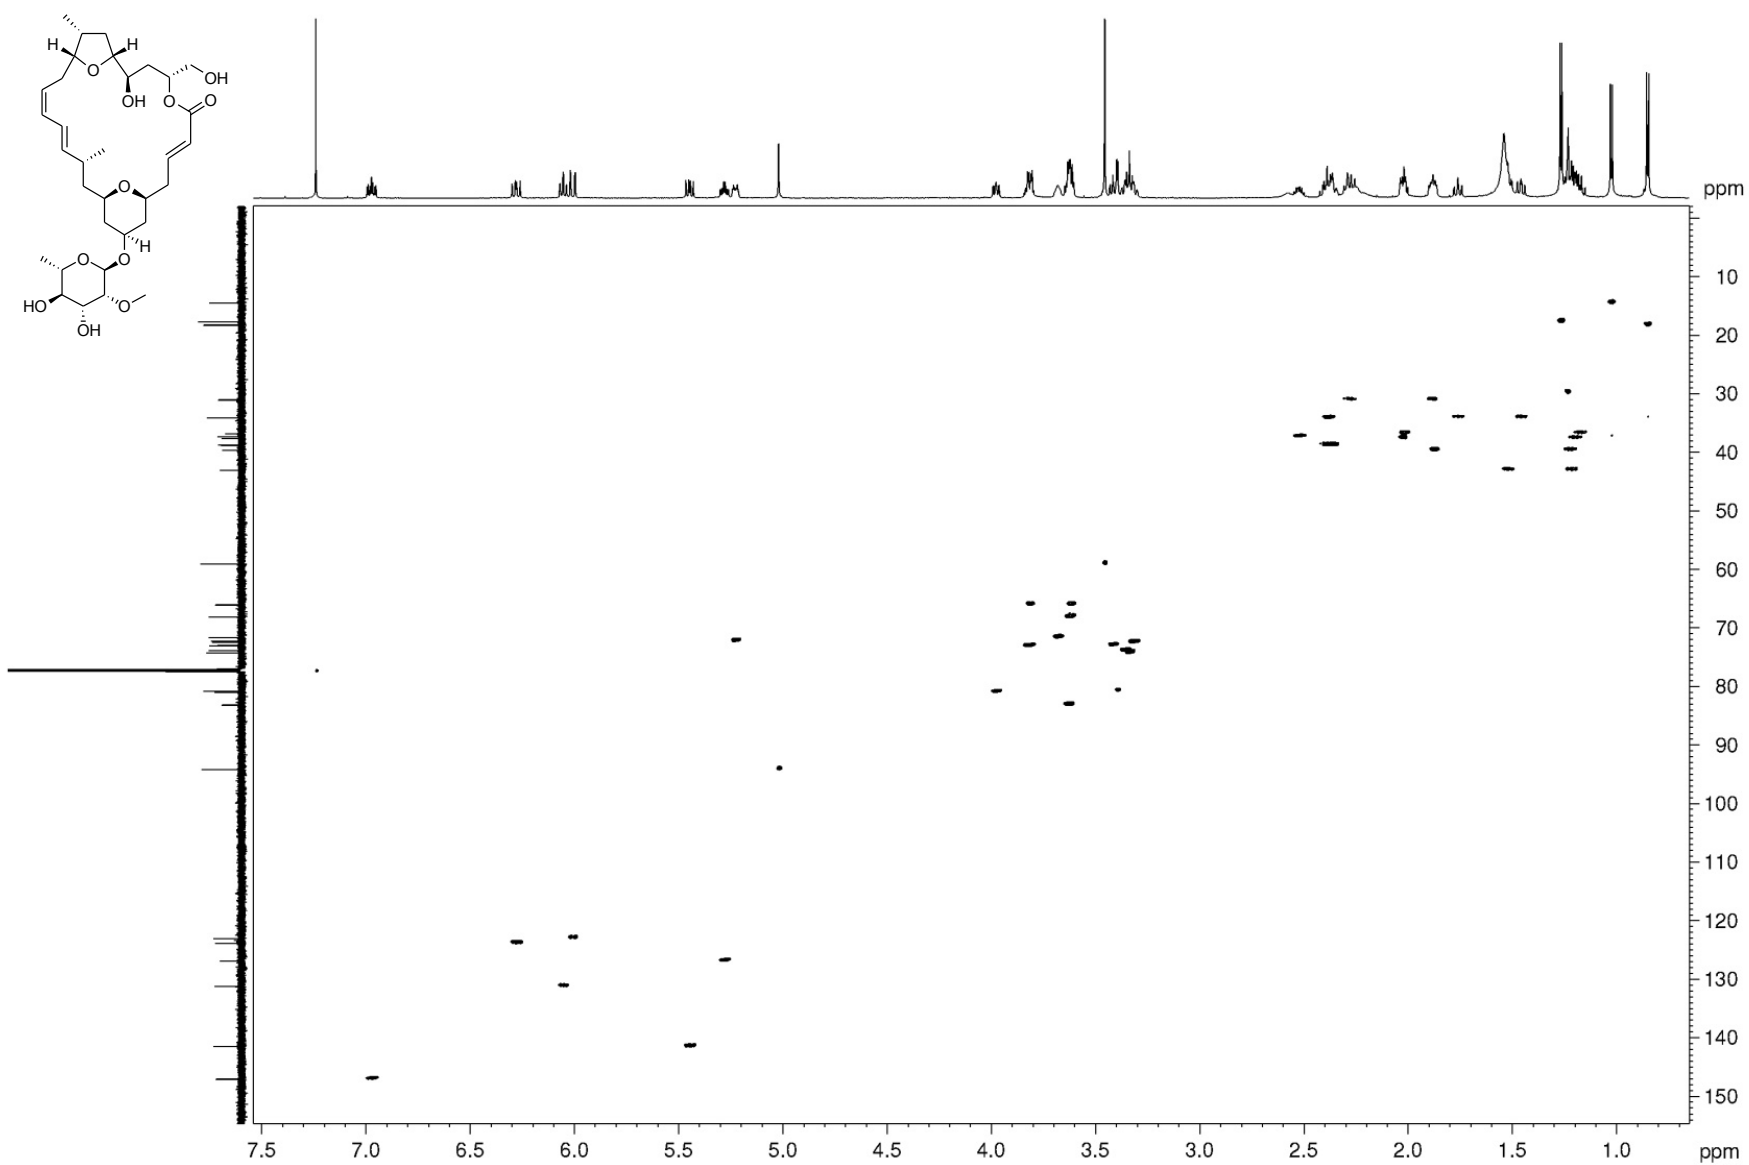

Figure S4. HSQC spectrum for mandelalide A (**1**; 700 MHz,  $\text{CDCl}_3$ )

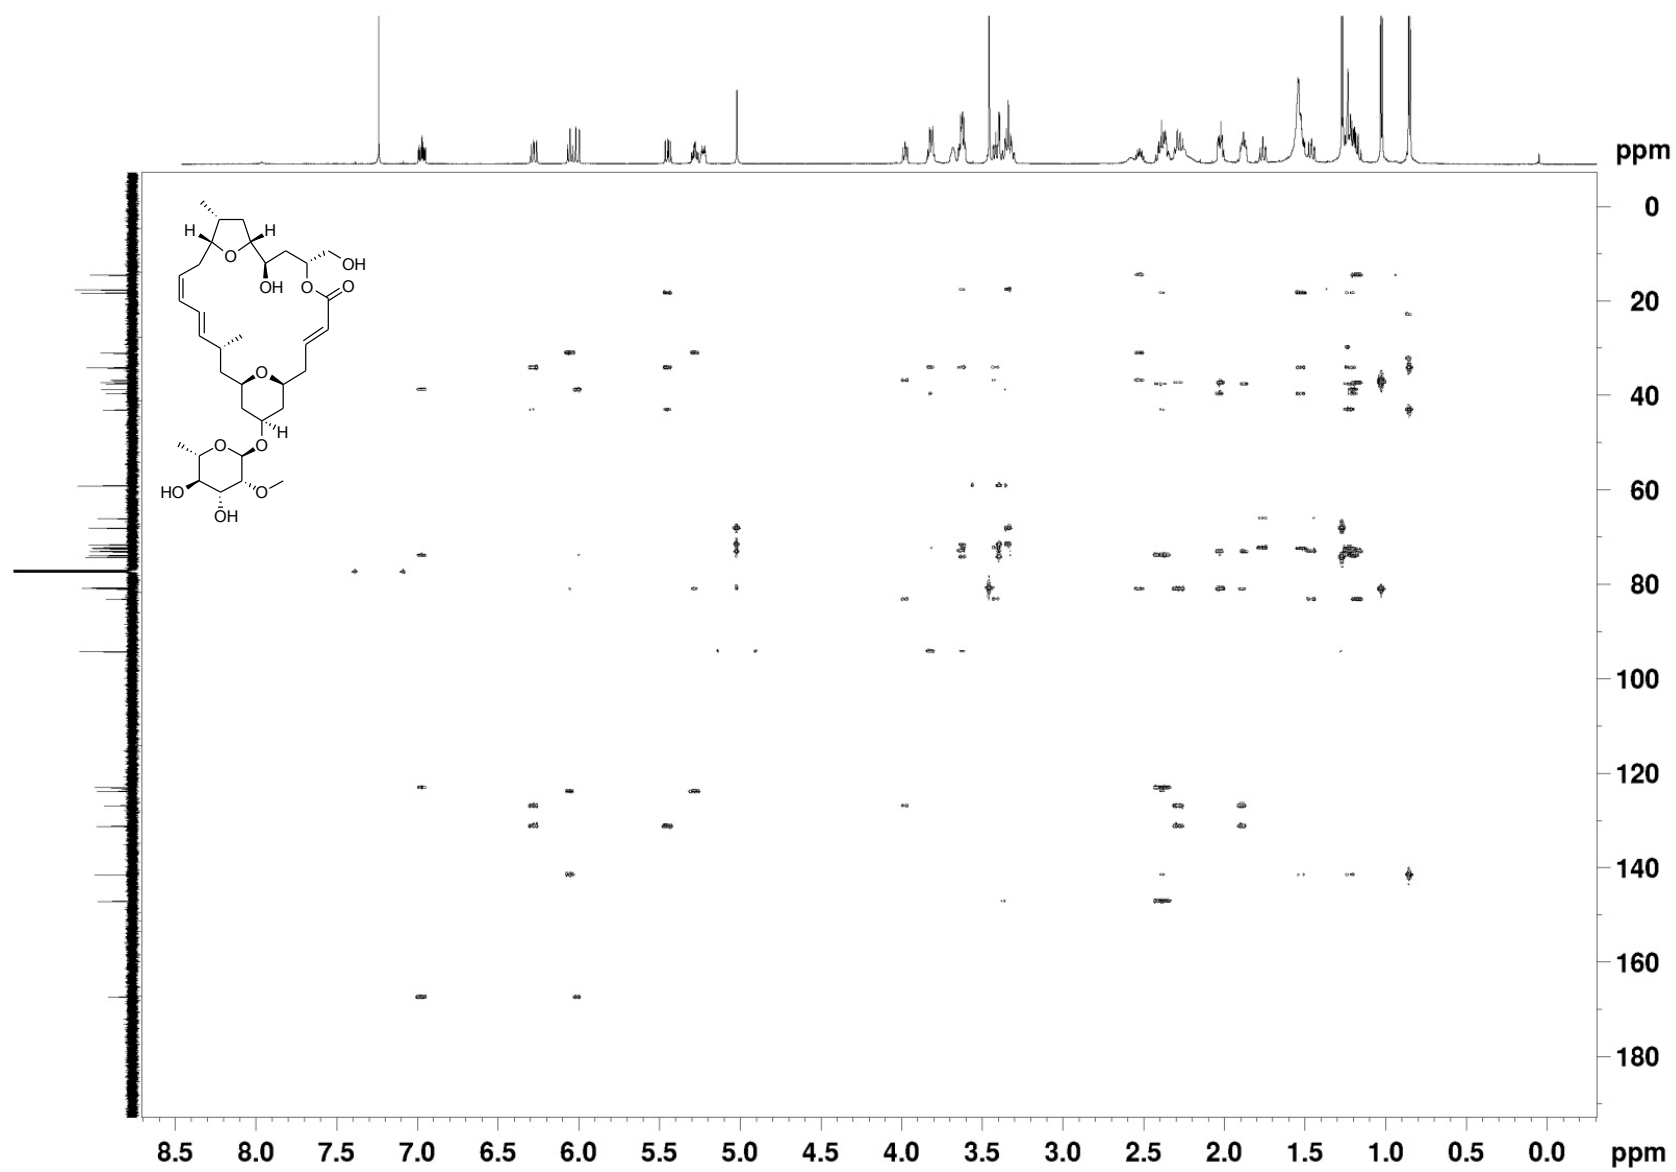

Figure S5. HMBC spectrum for mandelalide A (1; 700 MHz, CDCl<sub>3</sub>)

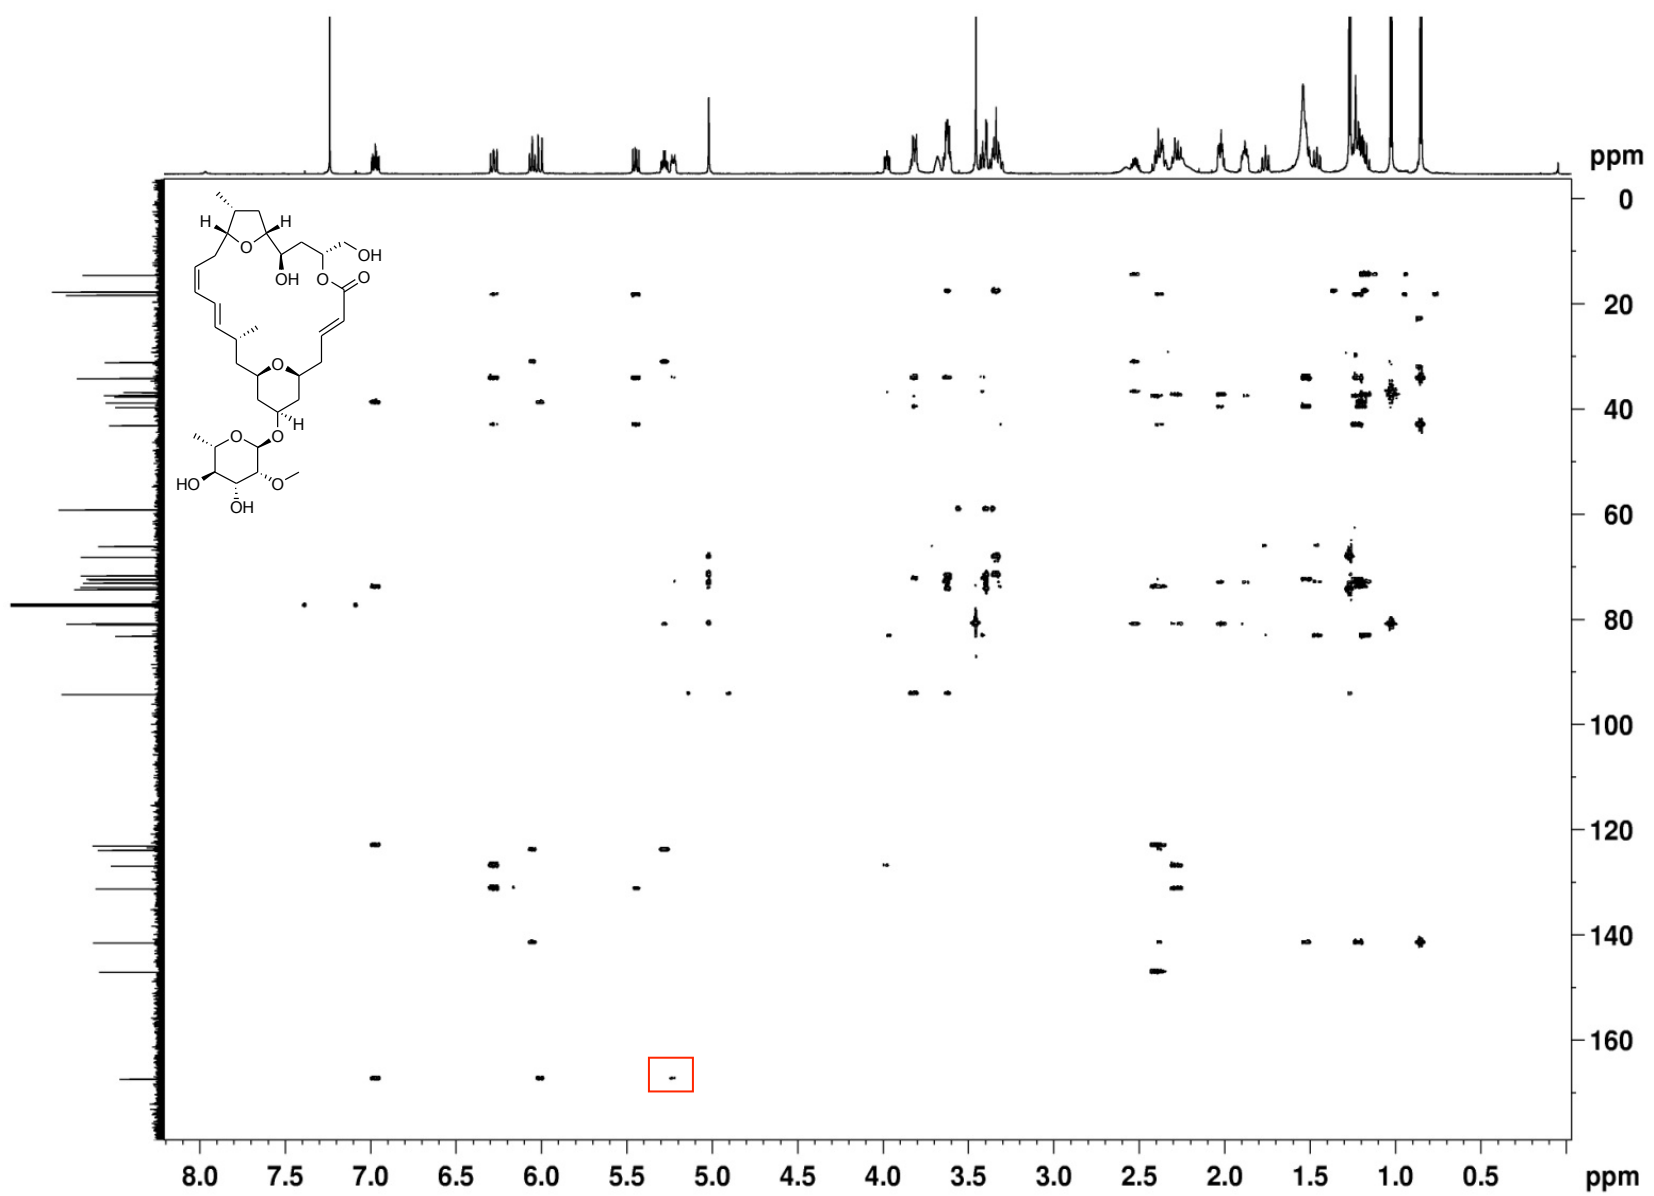

Figure S6. HMBC spectrum for mandelalide A (1), long range  $J = 4$  Hz (700 MHz,  $\text{CDCl}_3$ )

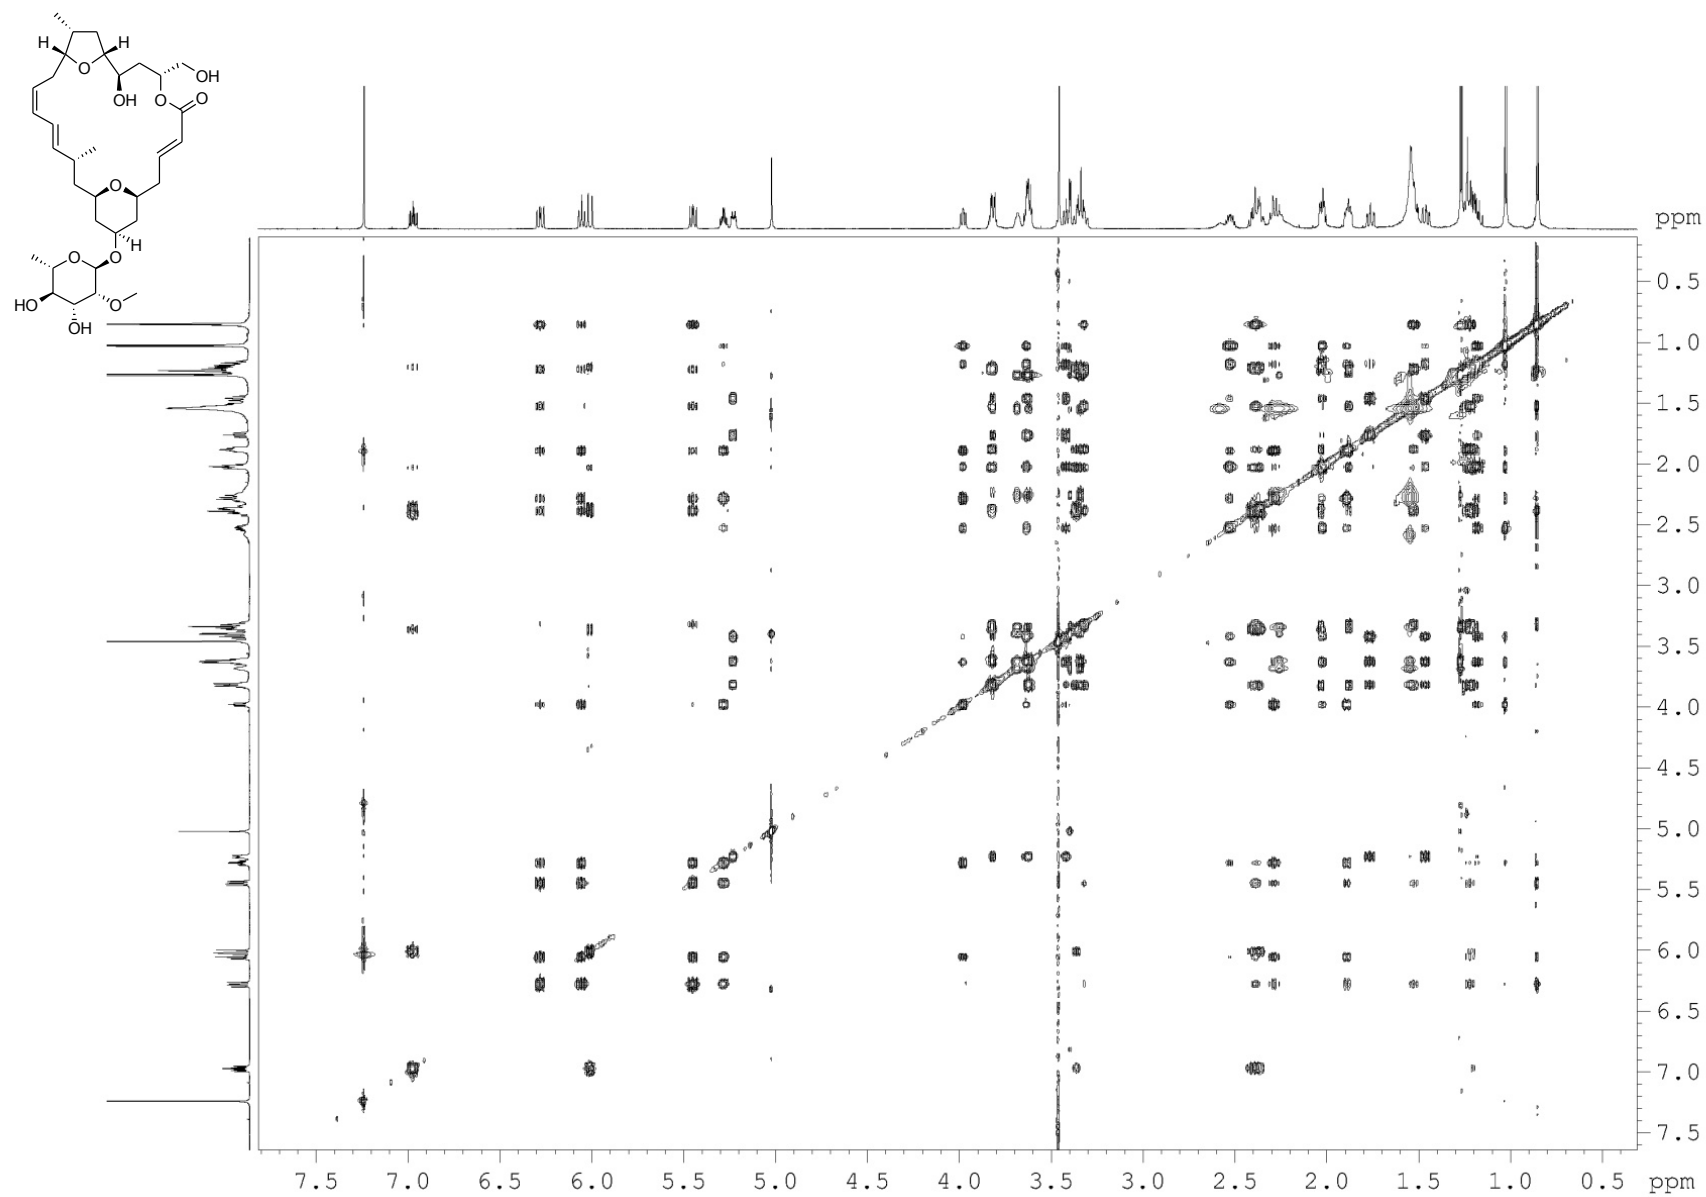

Figure S7. TOCSY spectrum for mandelalide A (**1**), TOCSY mixing time = 60 ms (700 MHz, CDCl<sub>3</sub>)

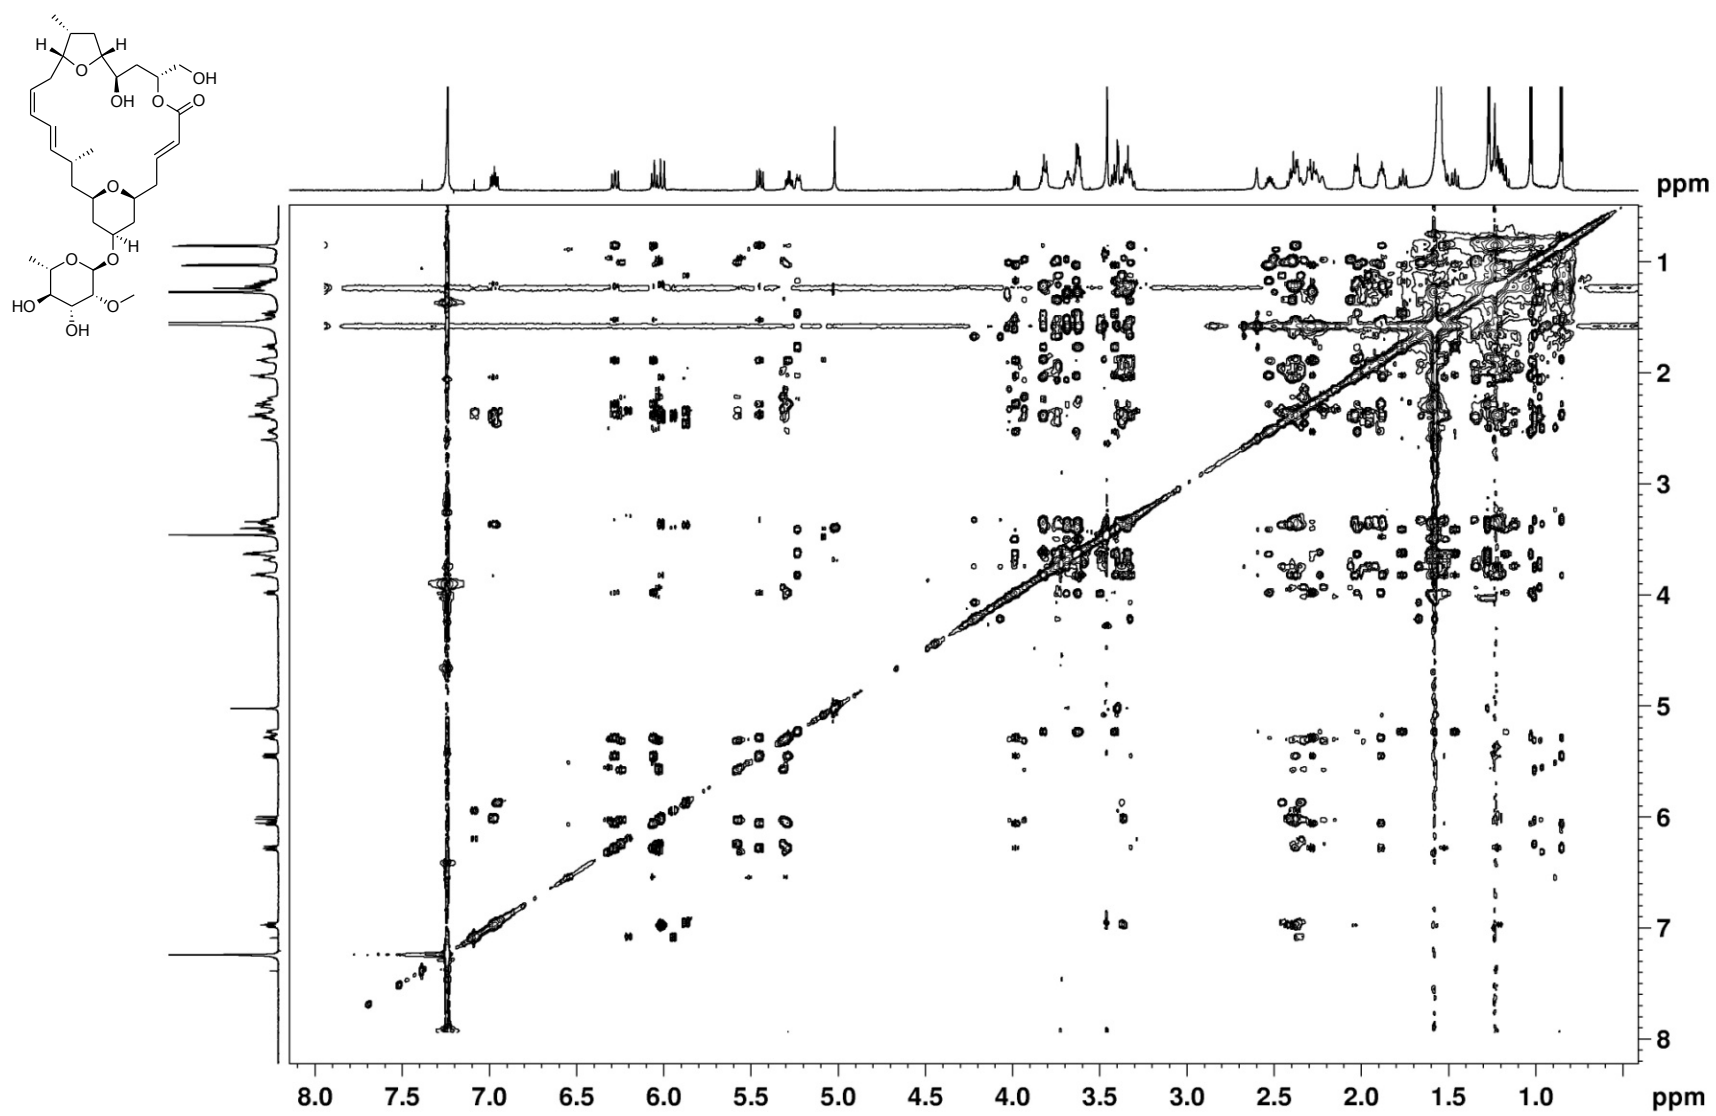

Figure S8. TOCSY spectrum for mandelalide A (1), TOCSY mixing time = 100 ms (700 MHz, CDCl<sub>3</sub>)

a)

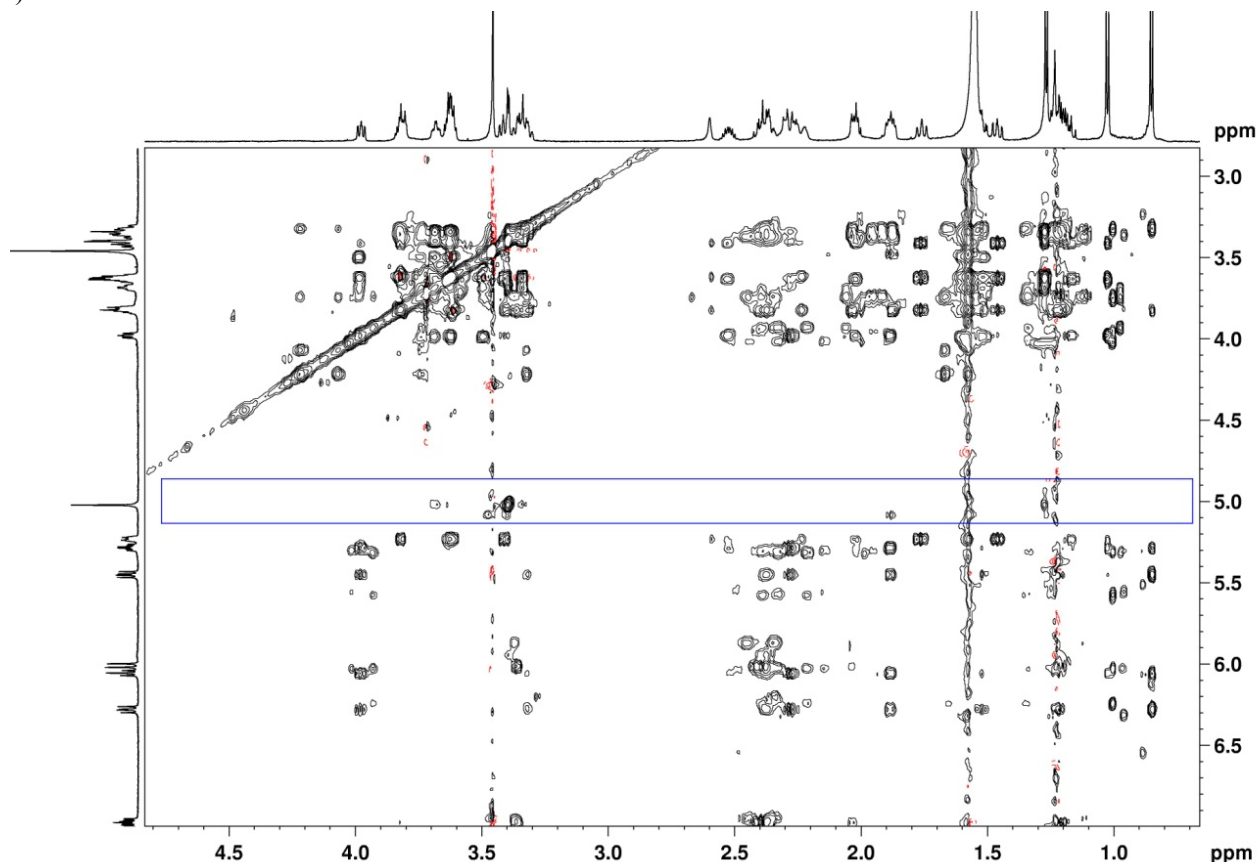

b)

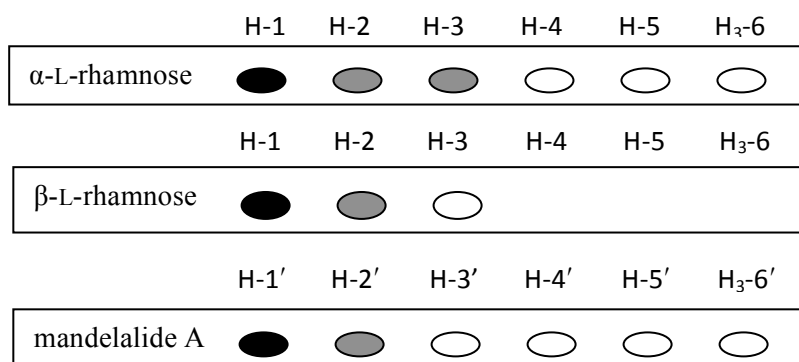

Figure S9. a) Partial TOCSY spectrum for mandelalide A (**1**) showing the  $\alpha$ -2-*O*-methylrhamnose region, TOCSY mixing time = 100 ms (700 MHz, CDCl<sub>3</sub>), b) The magnetization transfer pattern of TOCSY signals for the mandelalide A monosaccharide and  $\alpha$ - and  $\beta$ -L-rhamnose. The grey ovals indicate intensity or signal greater than 1.5 % of intensity measured for the anomeric <sup>1</sup>H signal, while white ovals indicate intensity of at least 0.5 % but no more than 1.5% intensity measured for the anomeric <sup>1</sup>H signal.

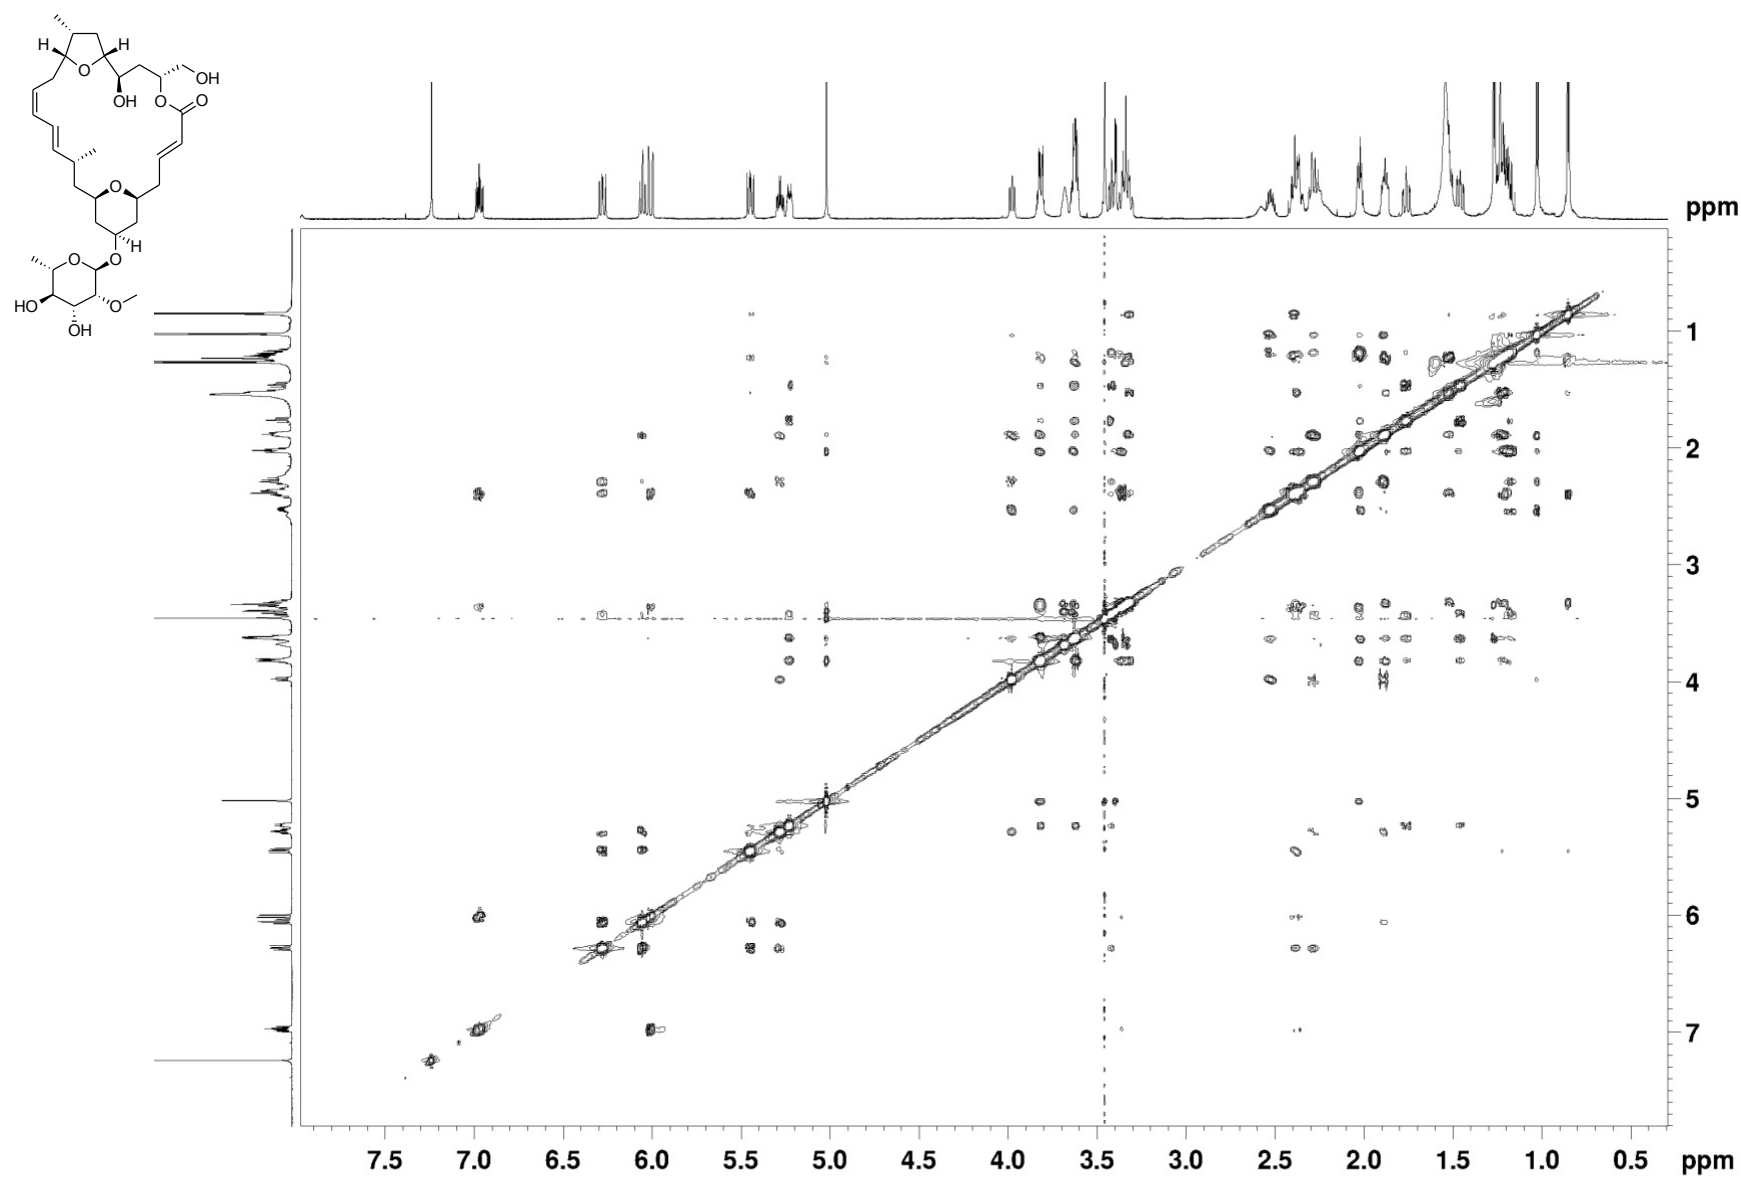

Figure S10. ROESY spectrum for mandelalide A (1; 700 MHz,  $\text{CDCl}_3$ )

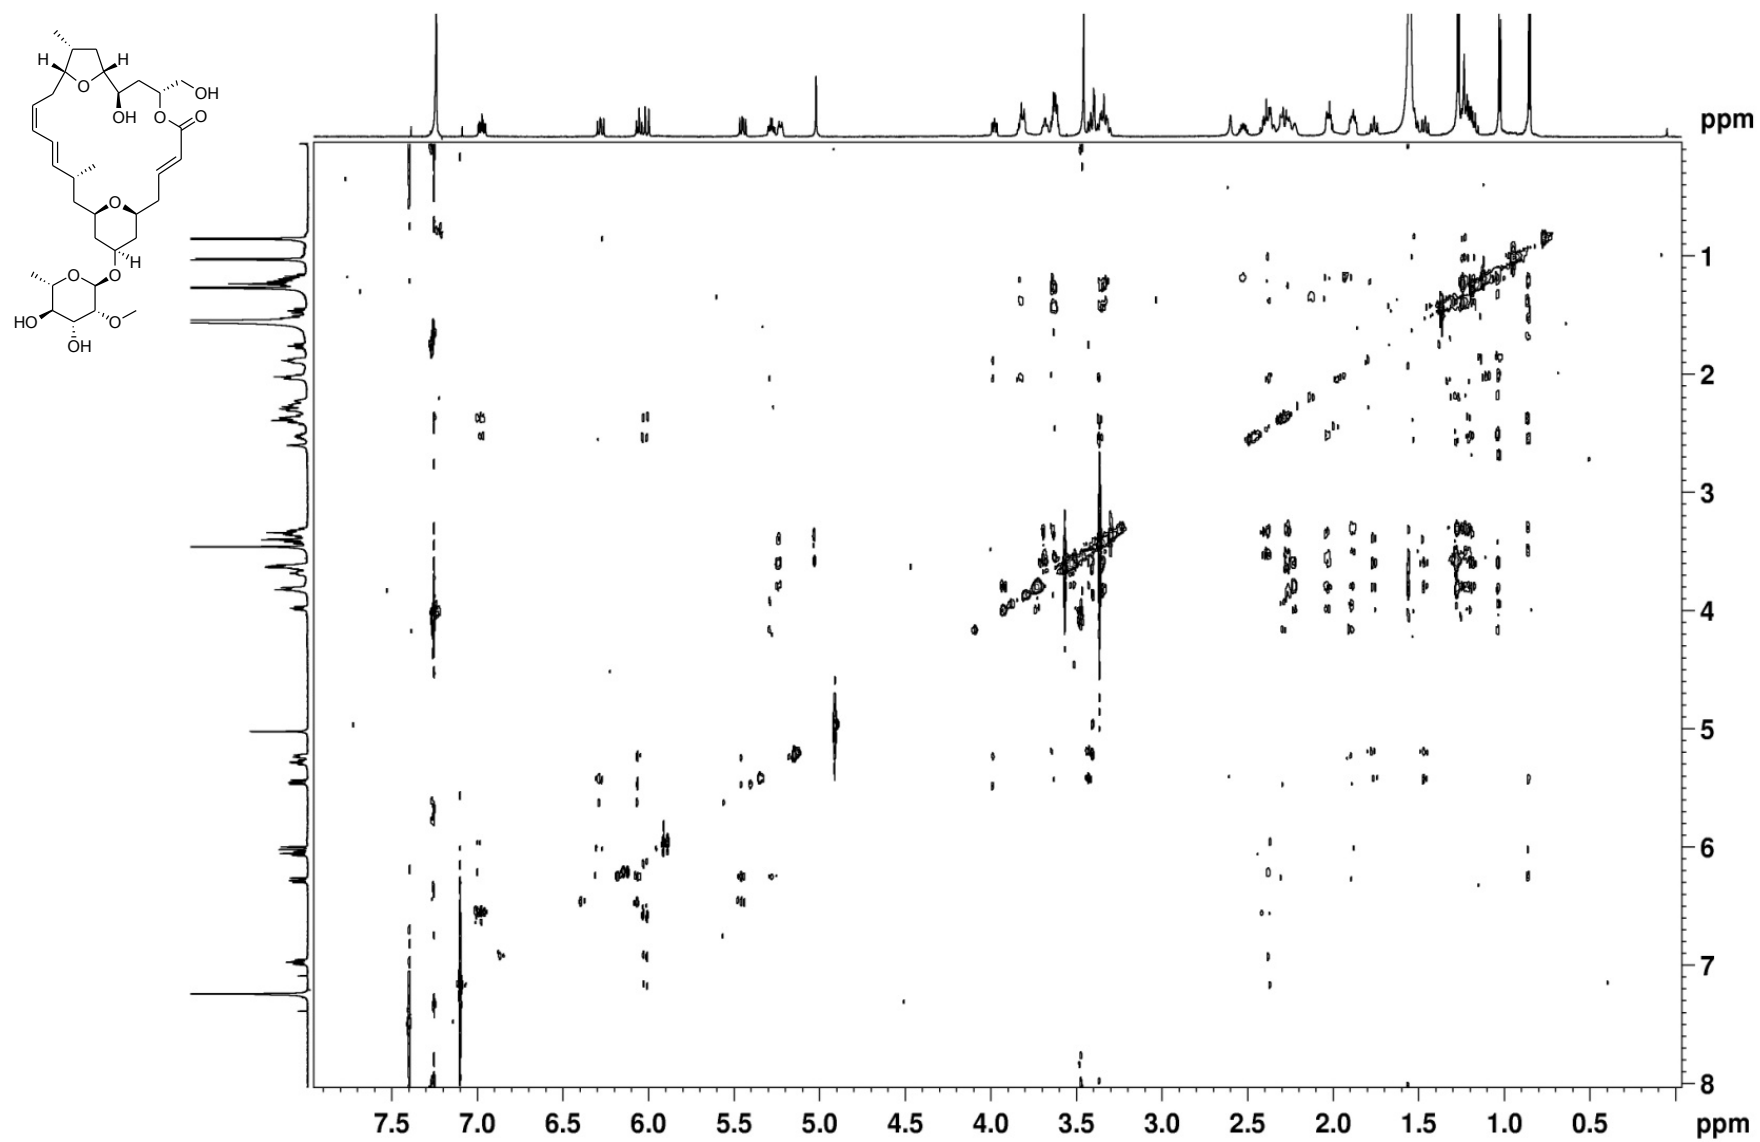

Figure S11. HETLOC spectrum for mandelalide A (1; 700 MHz, CDCl<sub>3</sub>)



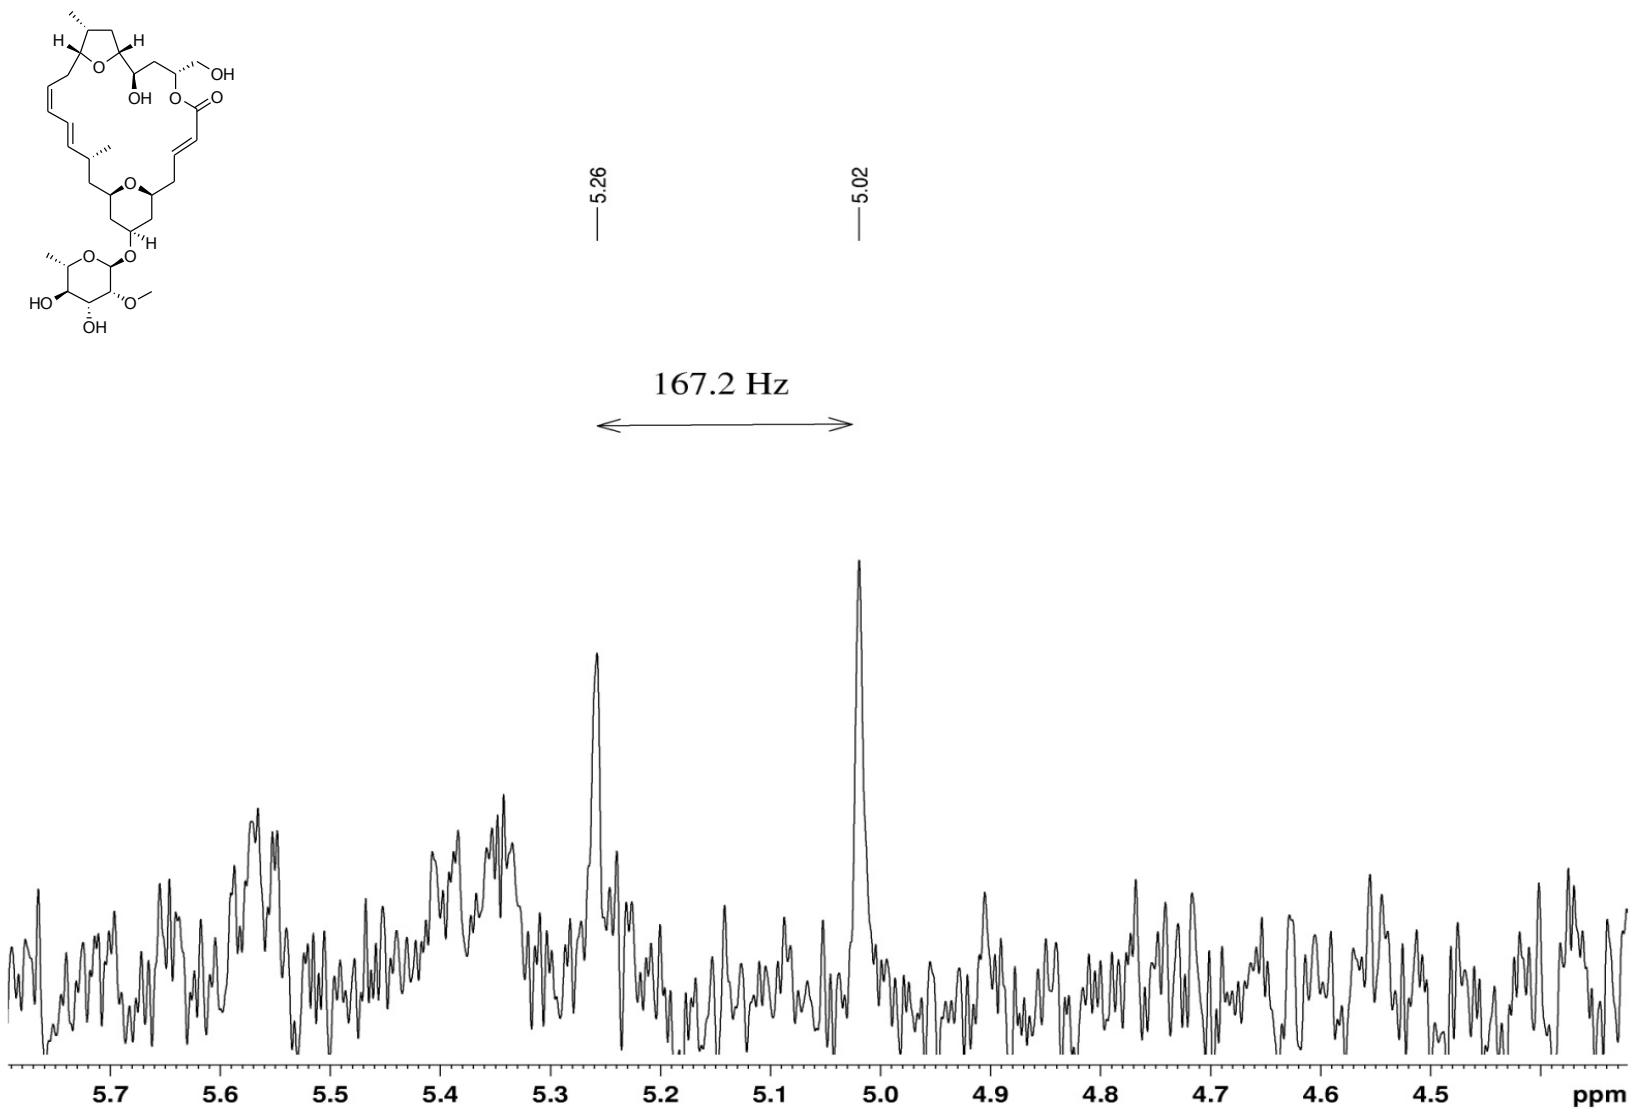

Figure S12. *F2* slice of HETLOC spectrum for mandelalide A (1) anomeric C-1' (700 MHz, CDCl<sub>3</sub>)



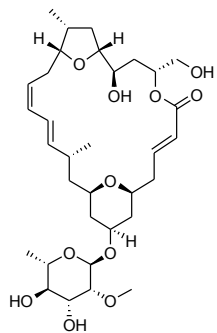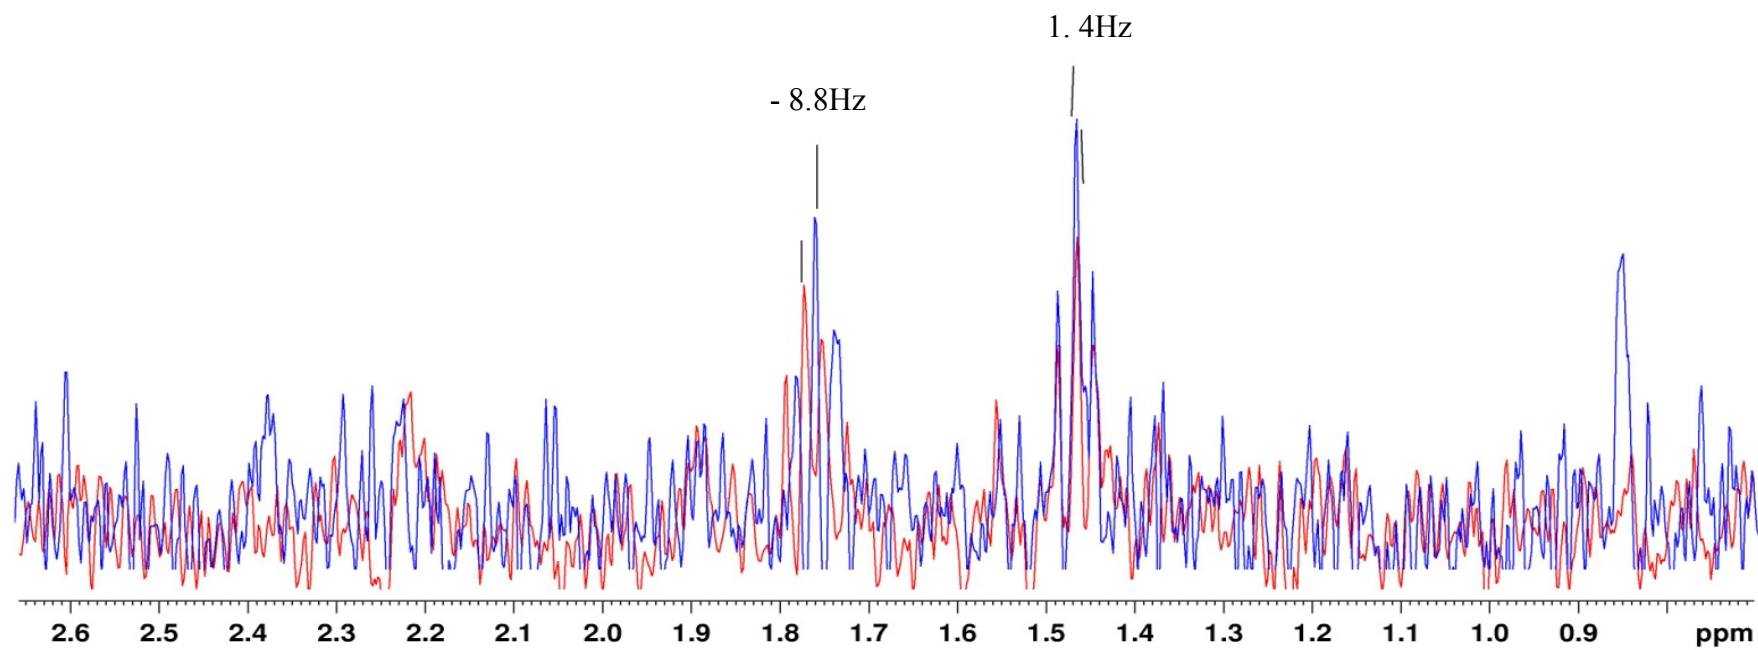

Figure S14. *F2* slice of HETLOC spectrum for mandelalide A (**1**) for C-23 (700 MHz, CDCl<sub>3</sub>)

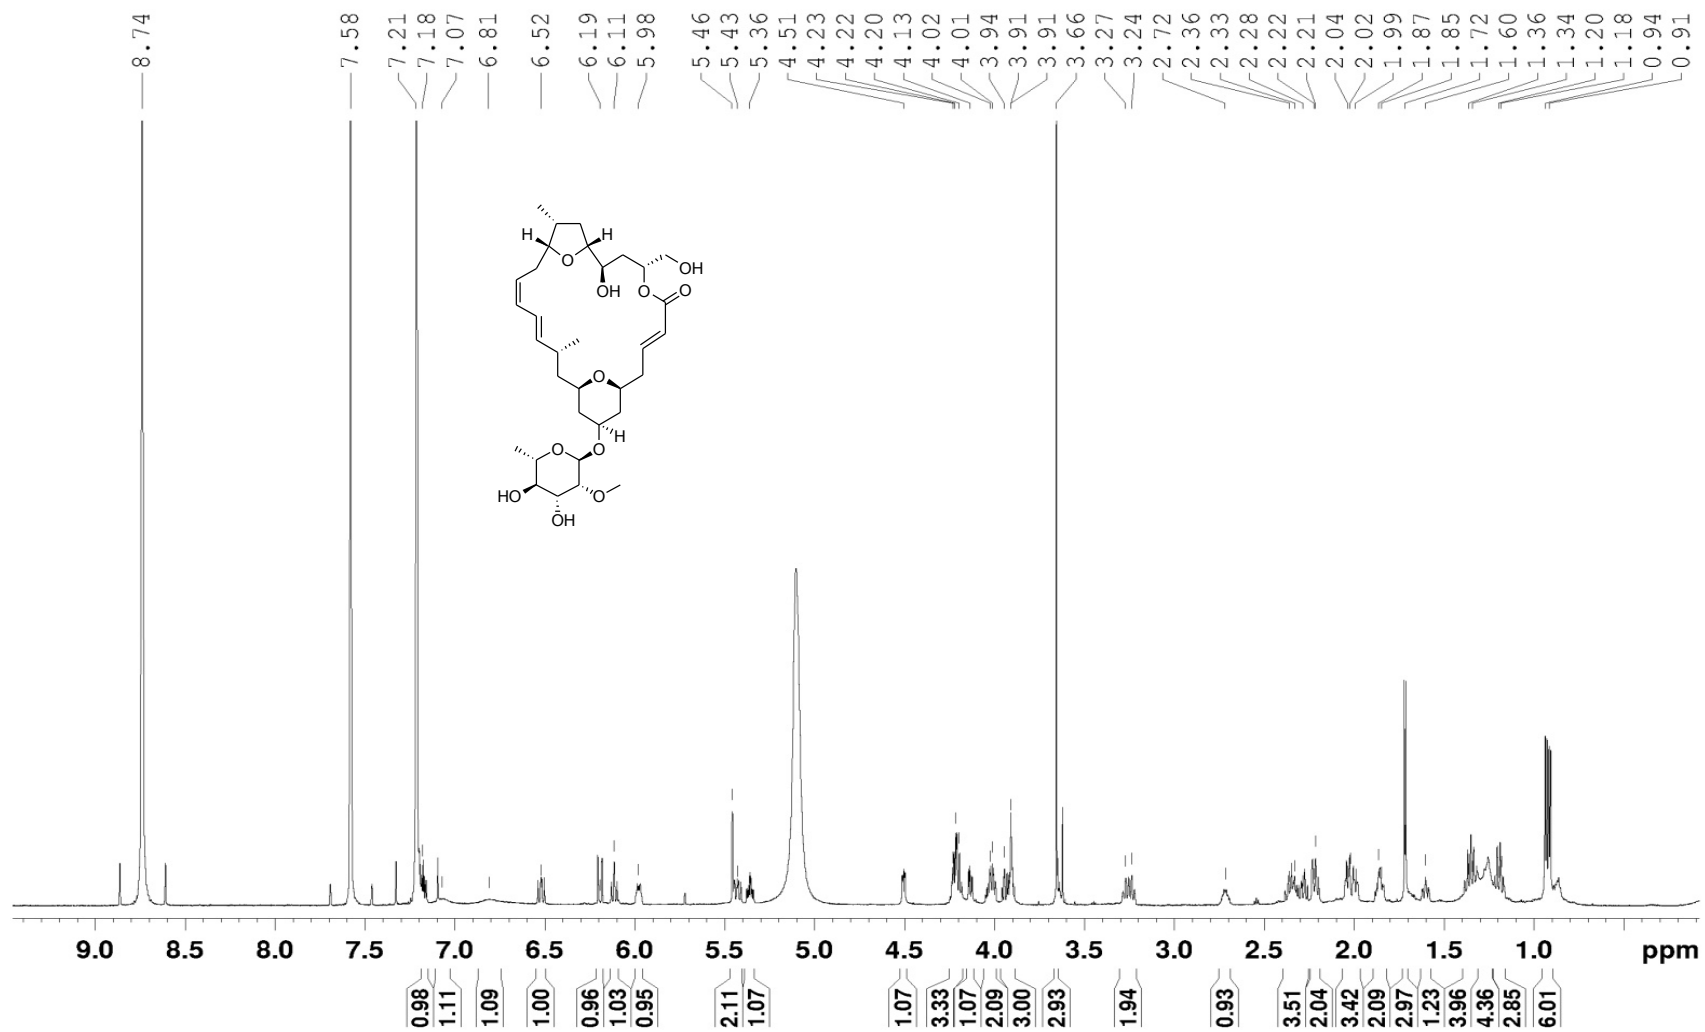

Figure S15.  $^1\text{H}$  NMR spectrum for mandelalide A (1; 700 MHz,  $\text{py-d}_5$ )

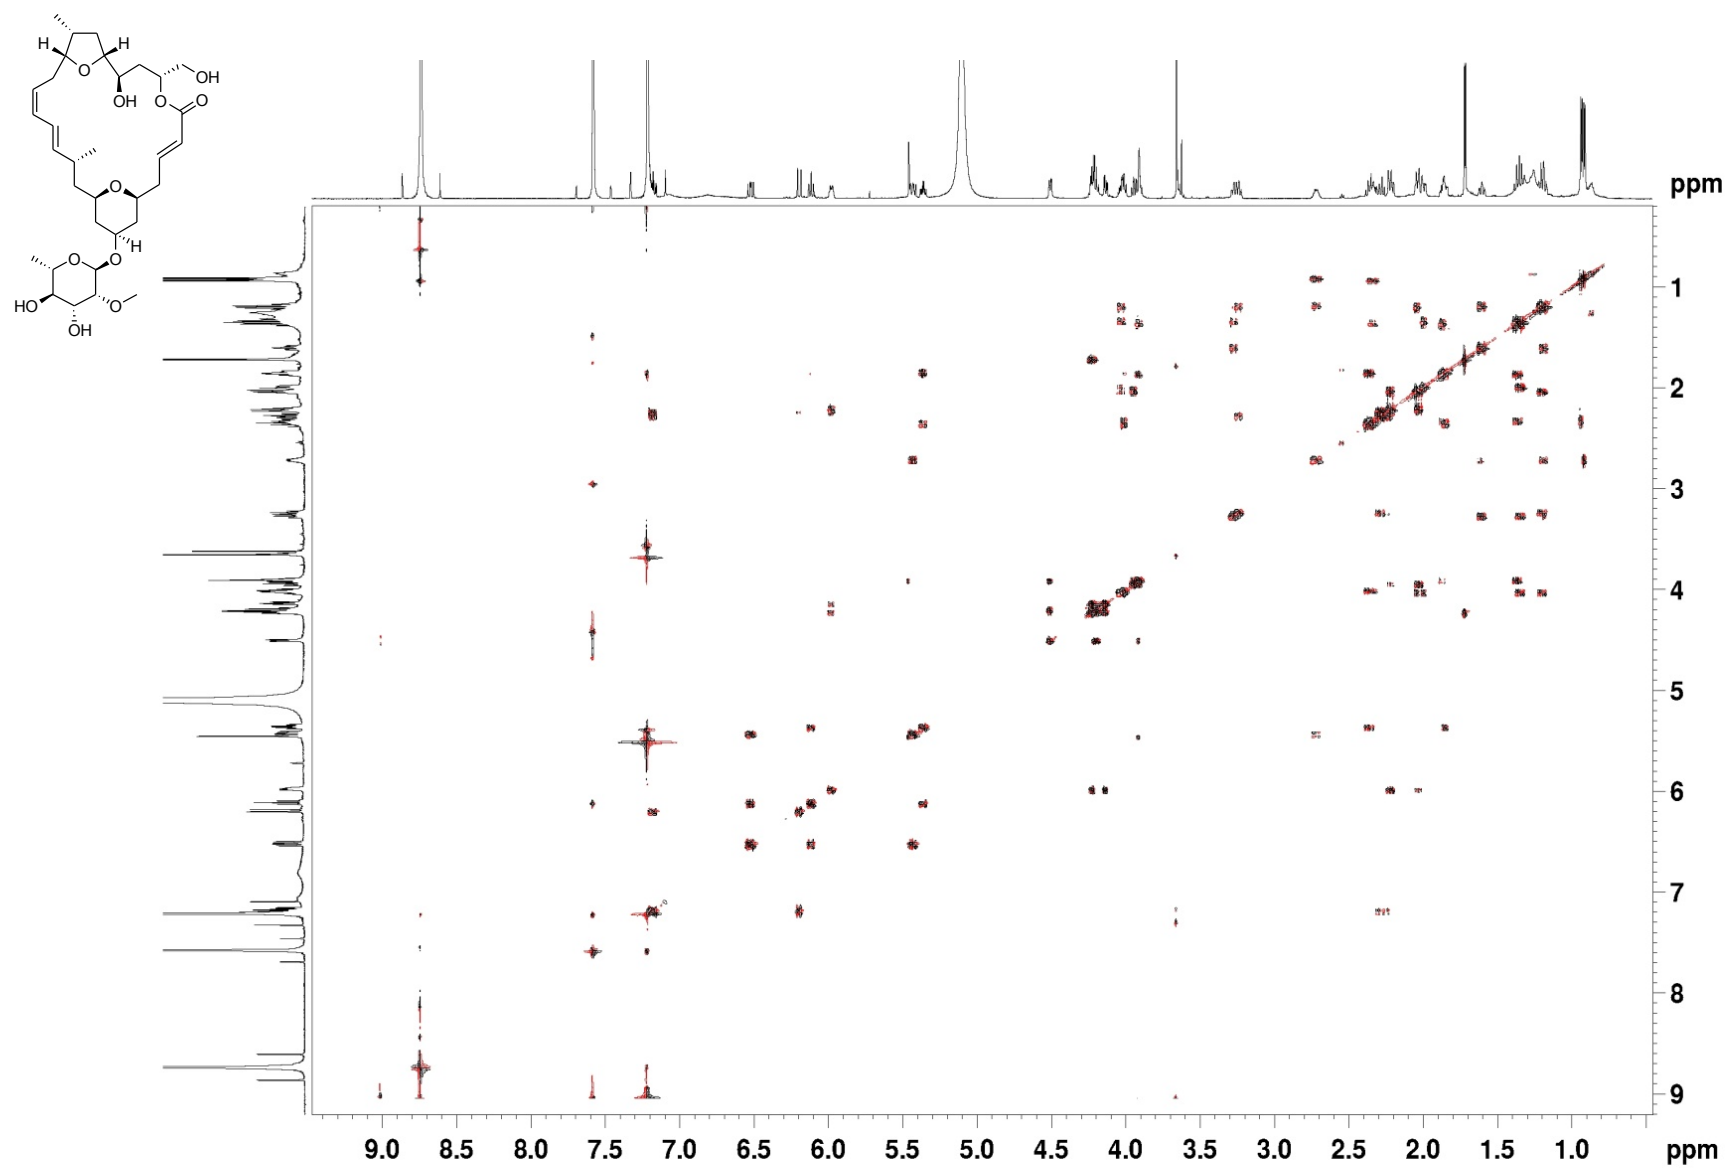

Figure S16. COSY NMR spectrum for mandelalide A (**1**; 700 MHz, py-*d*<sub>5</sub>)

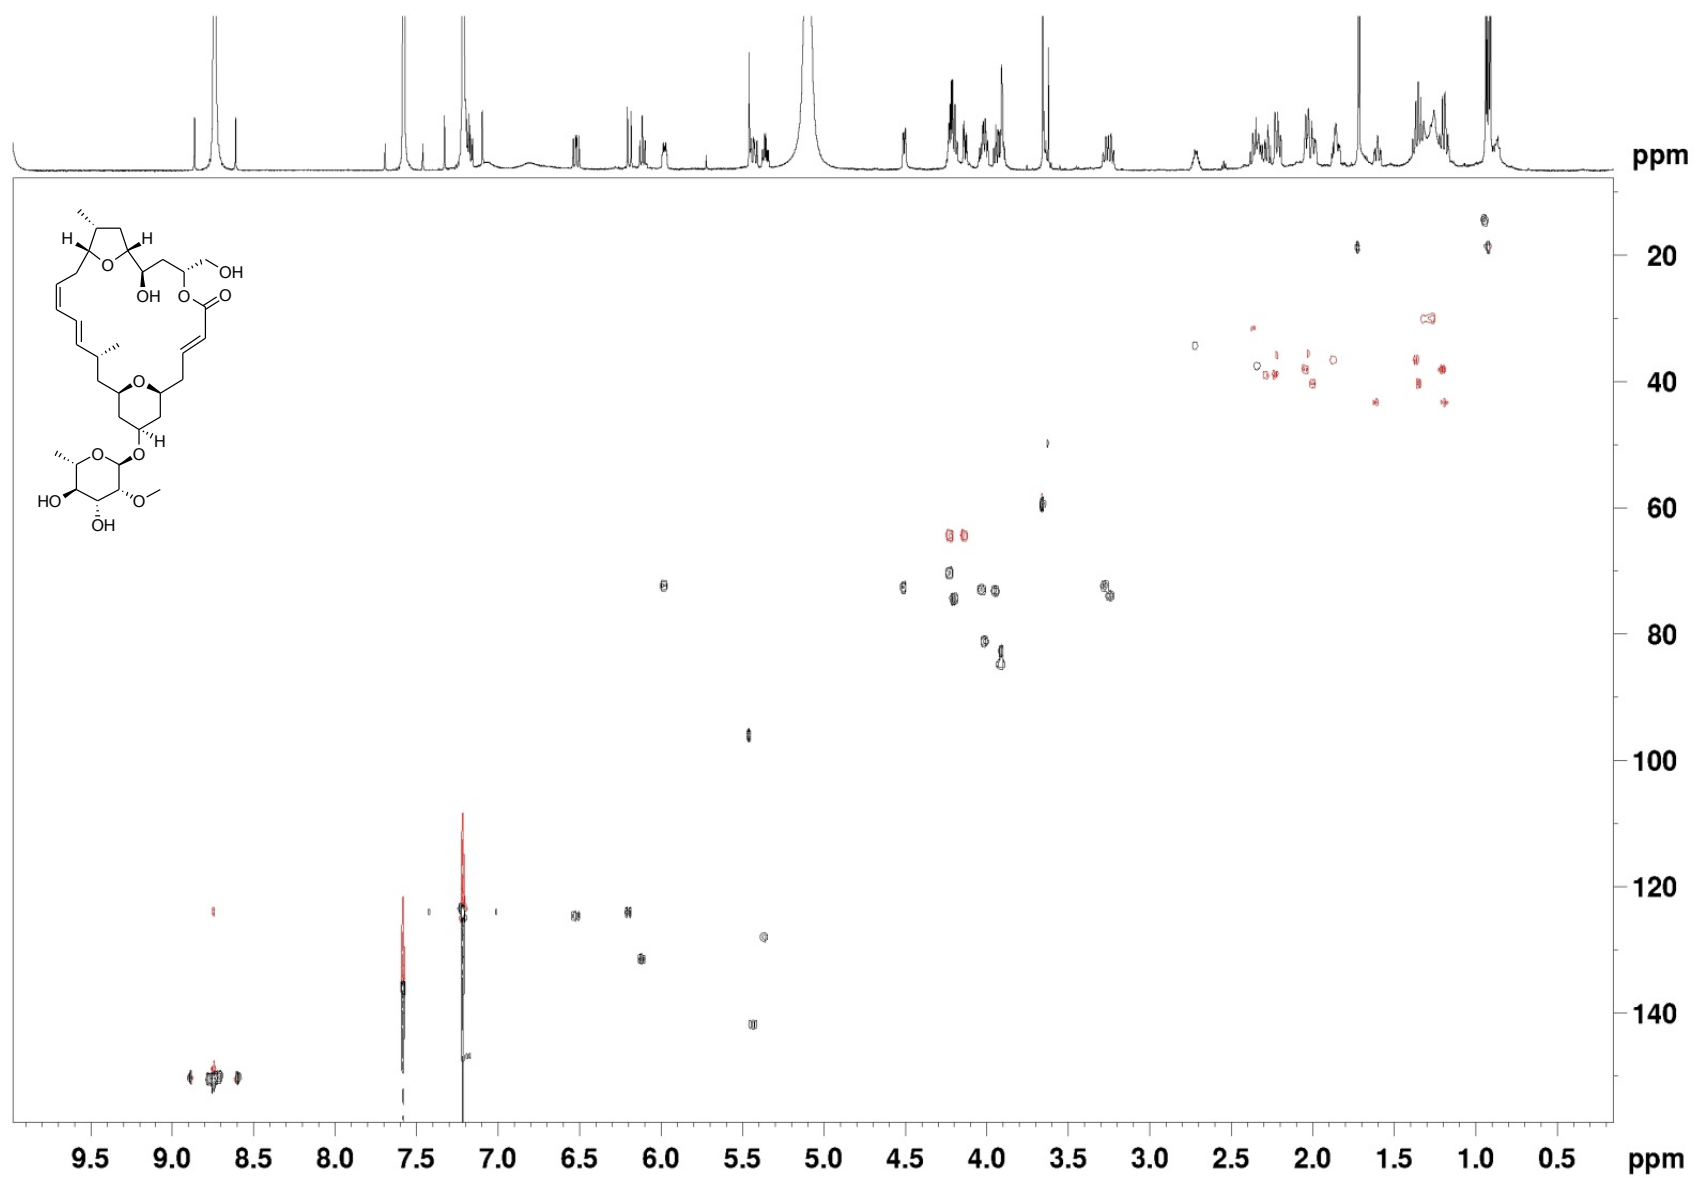

Figure S17. HSQC NMR spectrum for mandelalide A (1; 700 MHz,  $\text{py-d}_5$ )

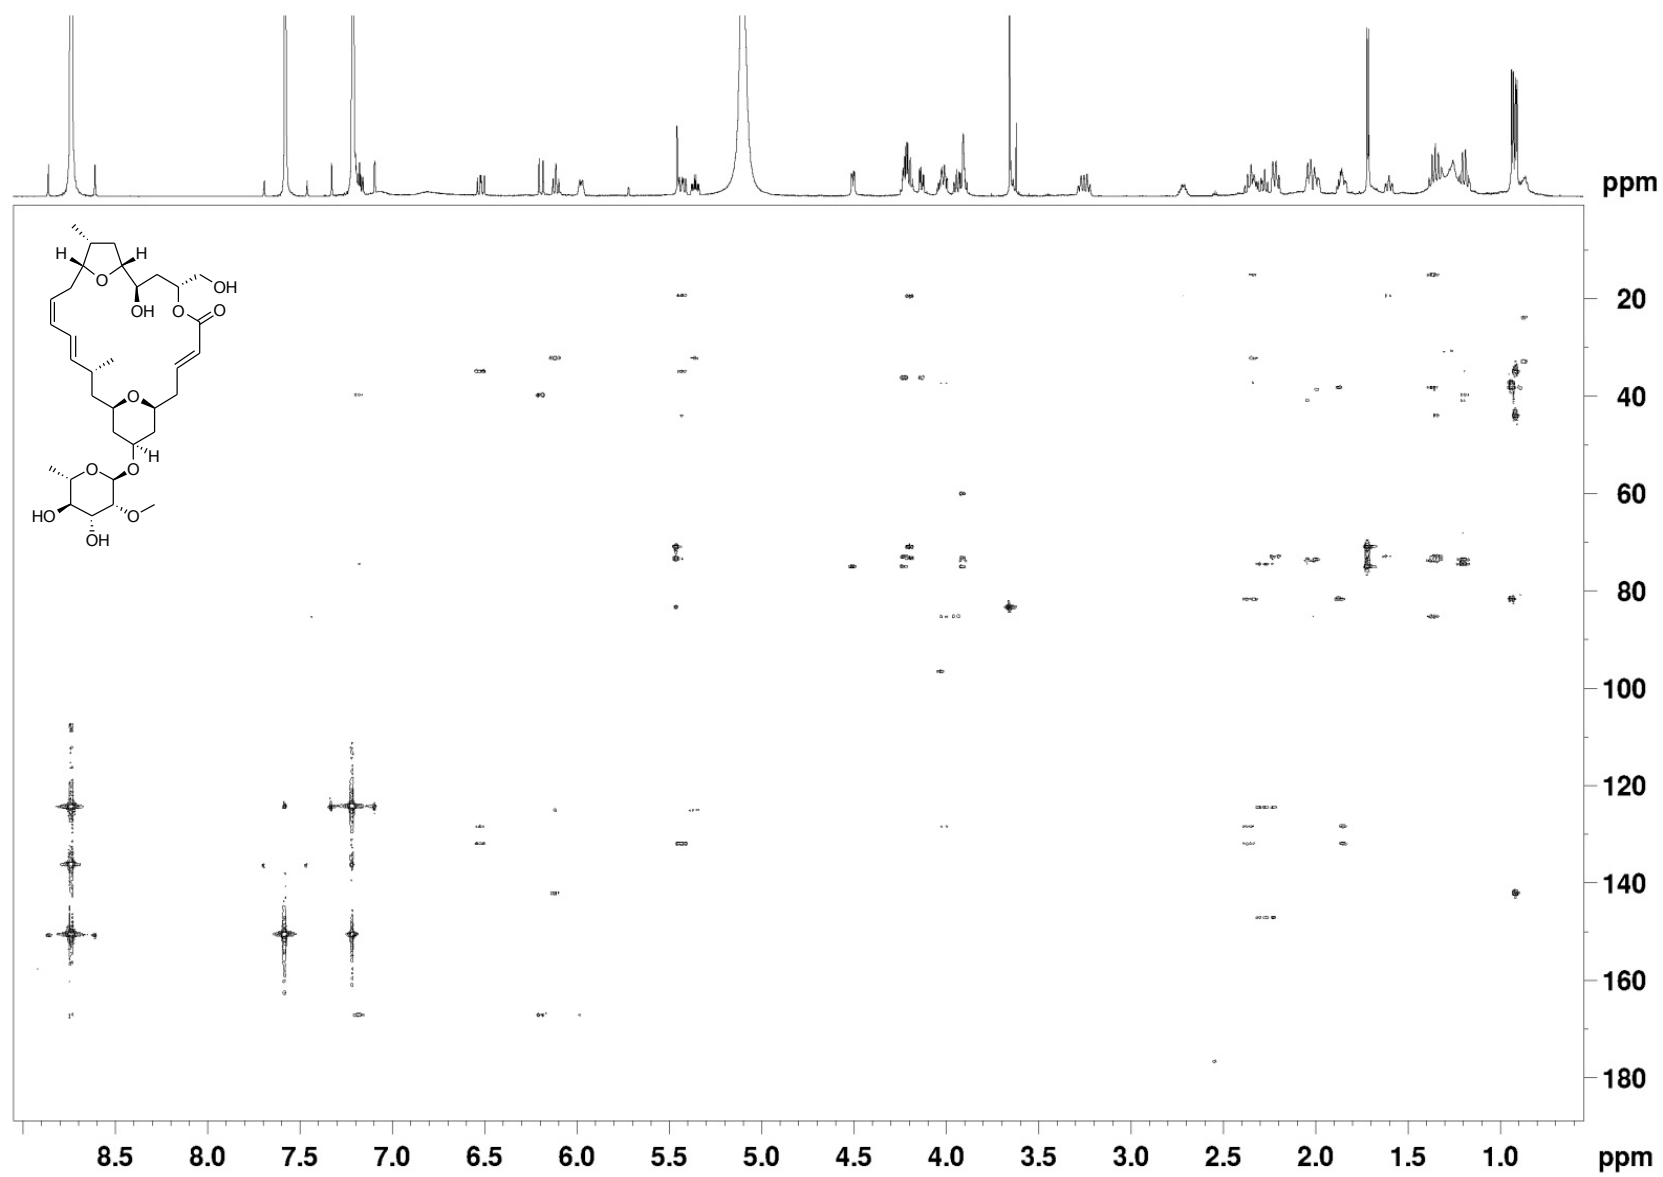

Figure S18. HMBC NMR spectrum for mandelalide A (1; 700 MHz,  $\text{py-d}_5$ )

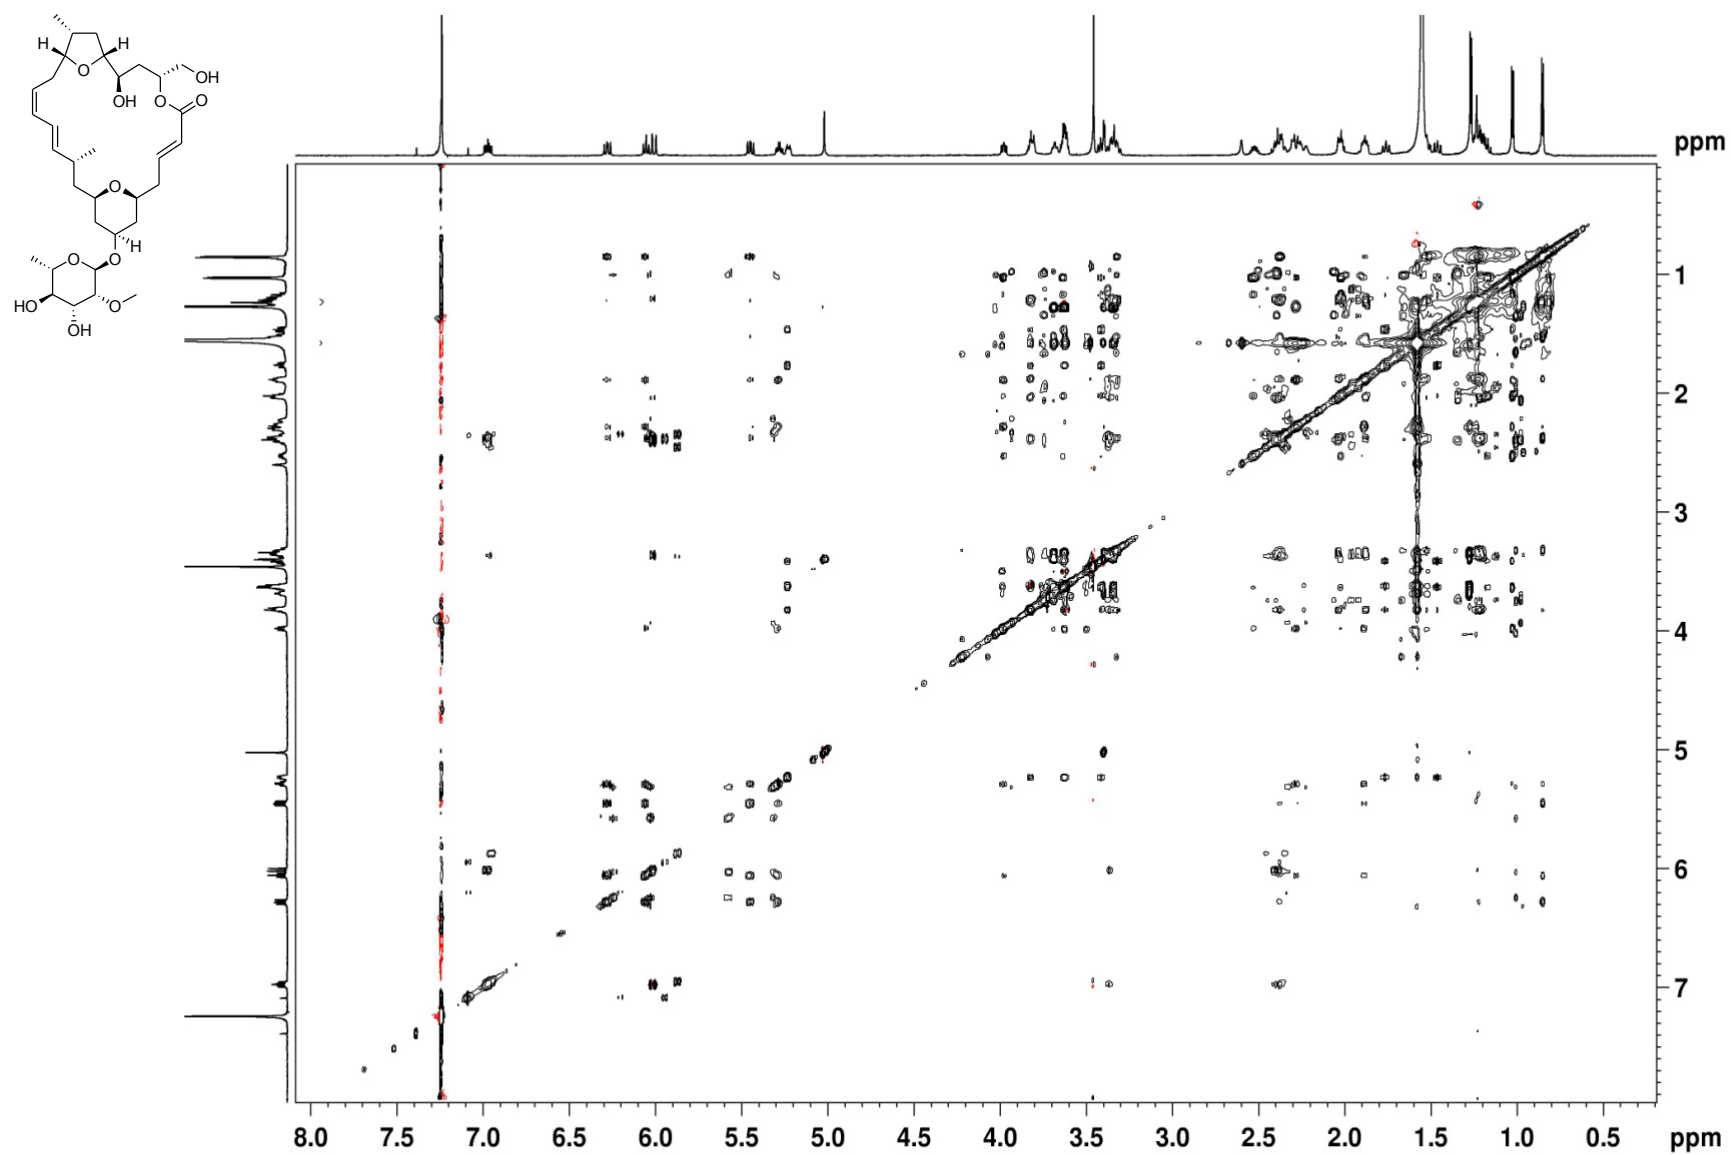



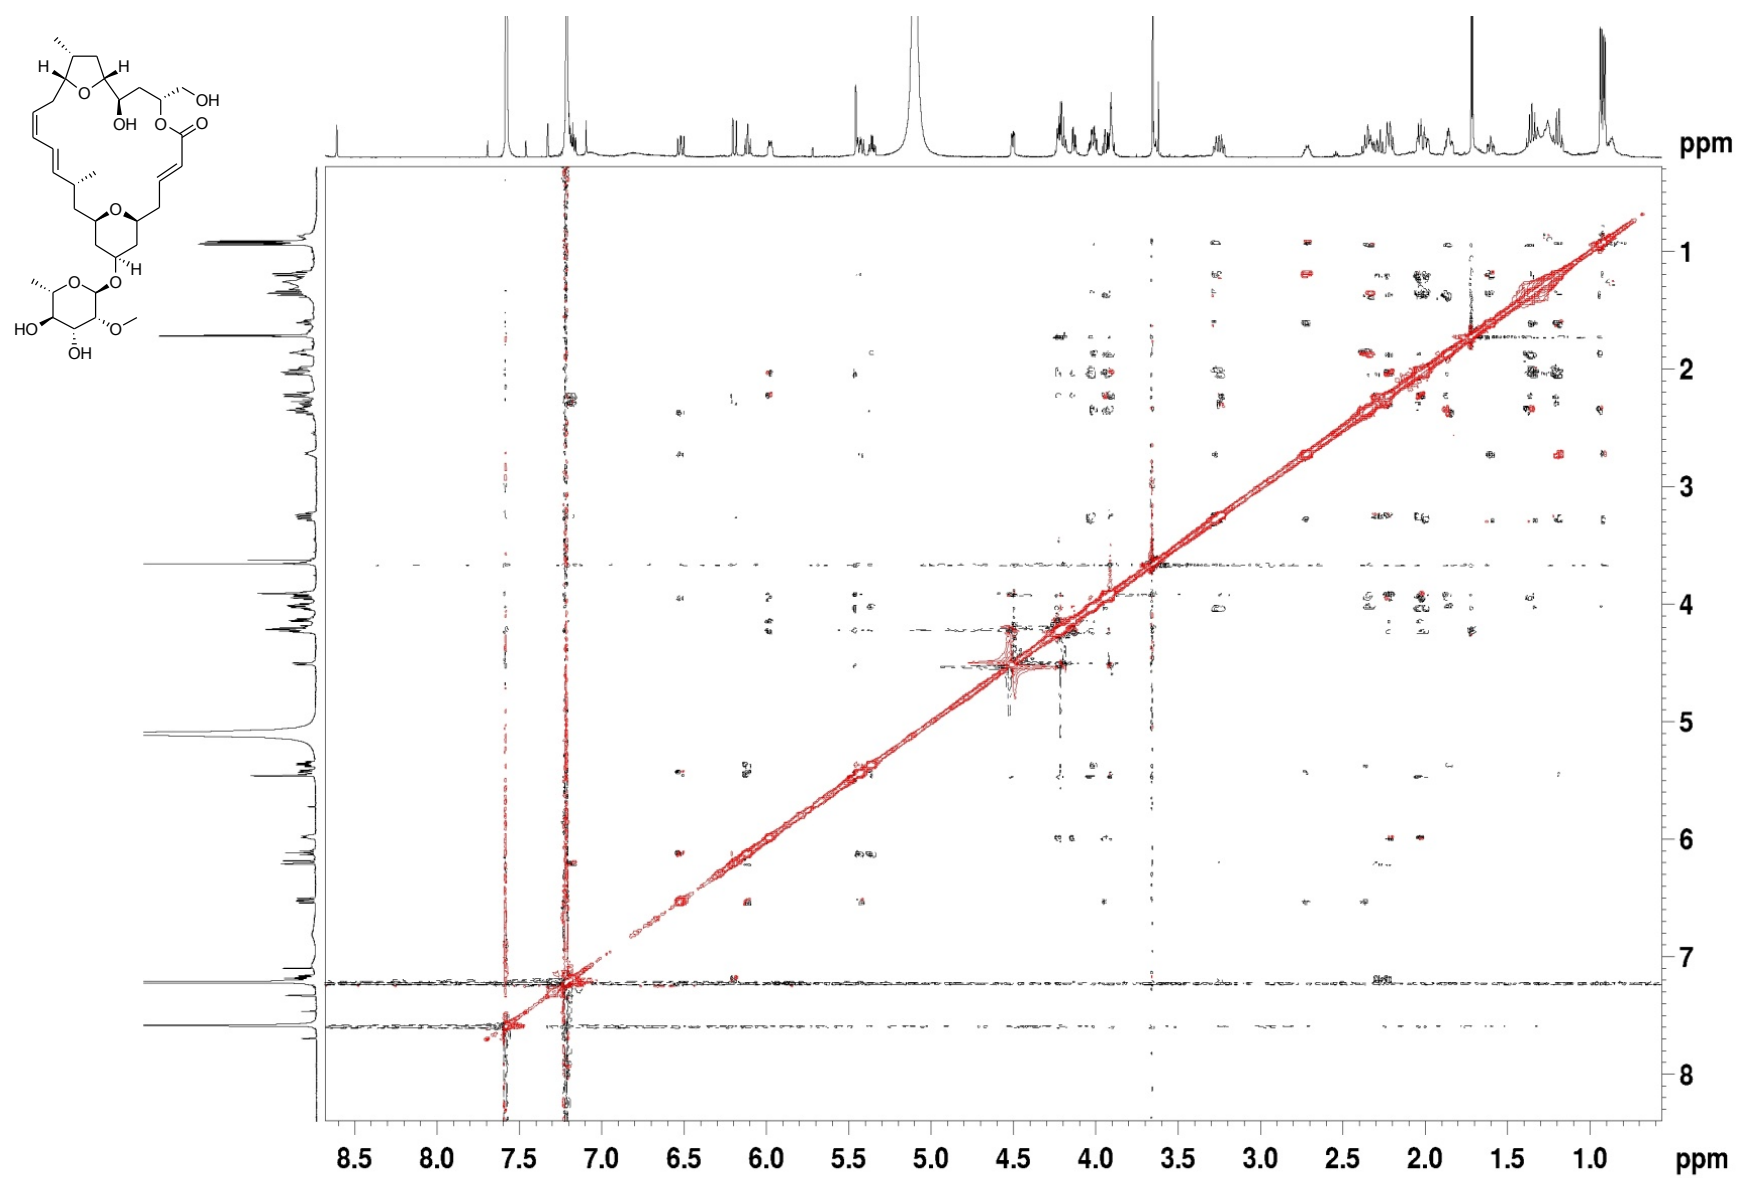

Figure S20. ROESY NMR spectrum for mandelalide A (**1**; 700 MHz,  $py-d_5$ )

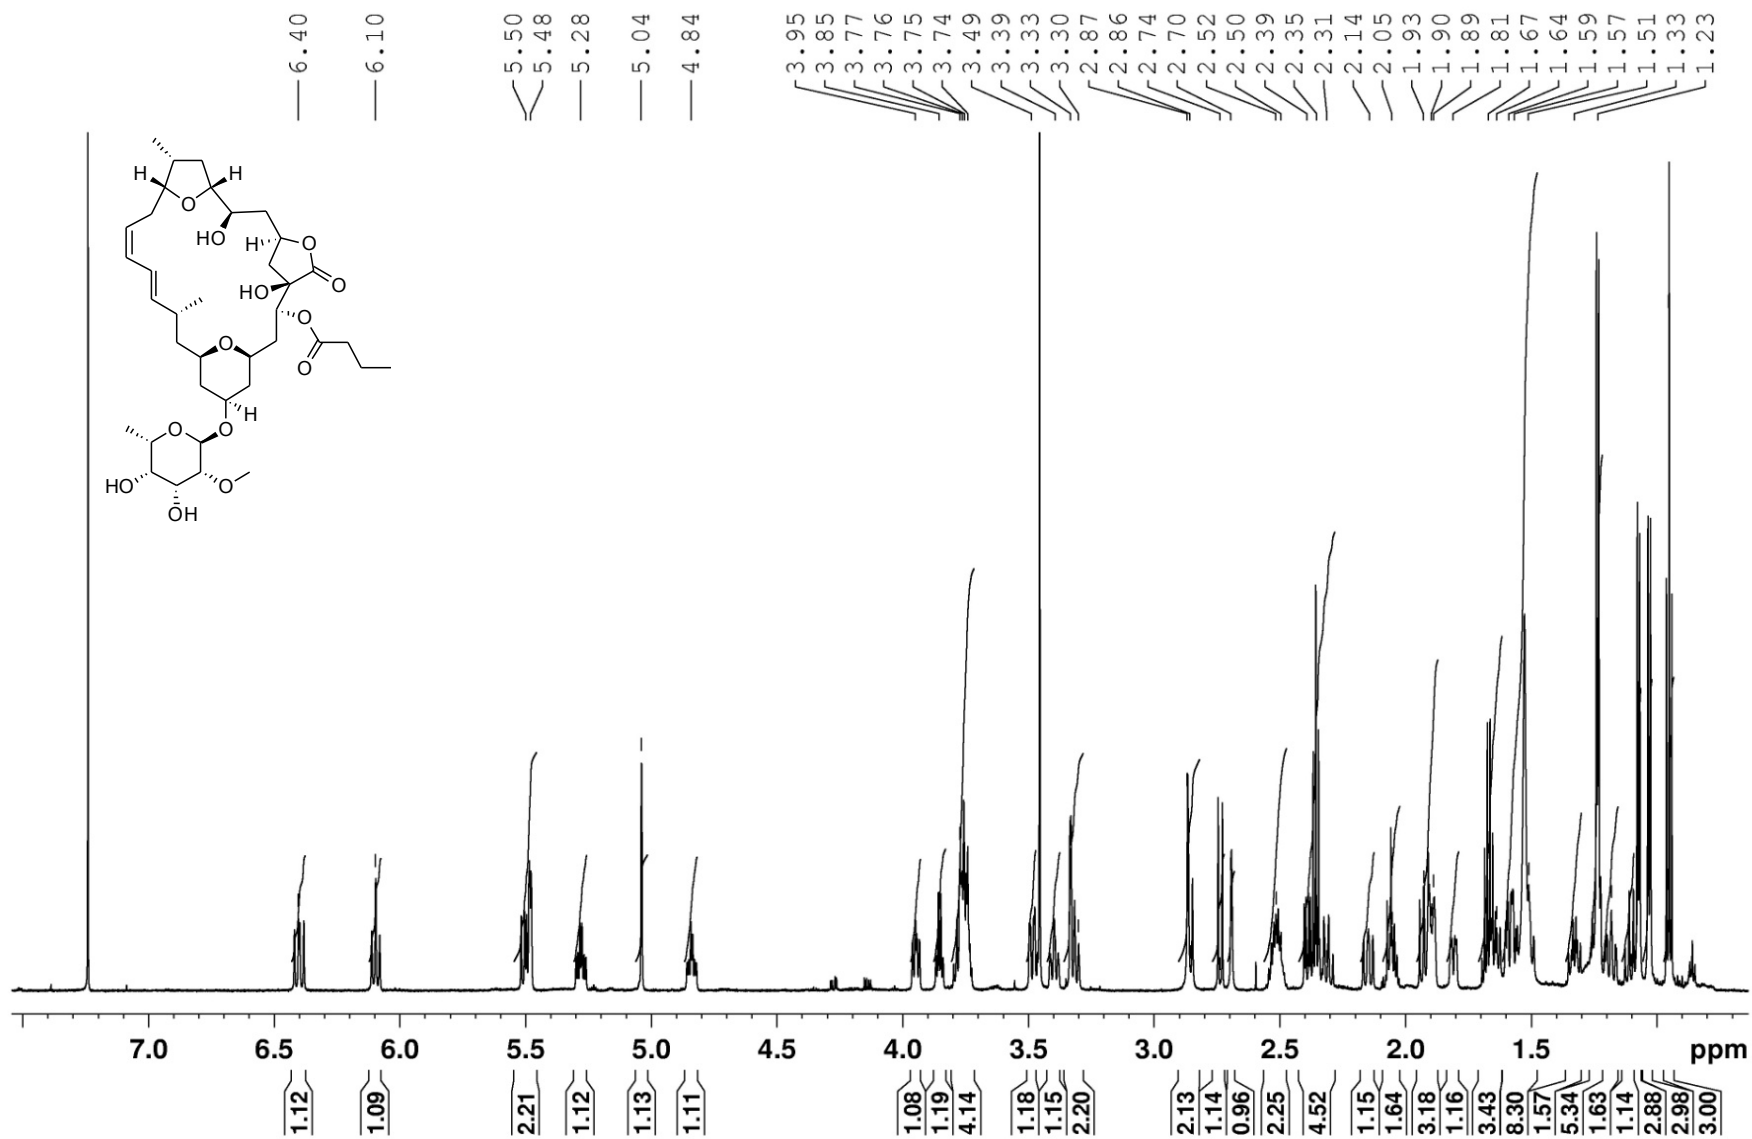

Figure S21. <sup>1</sup>H NMR spectrum for mandelalide B, (2; 700 MHz, CDCl<sub>3</sub>)

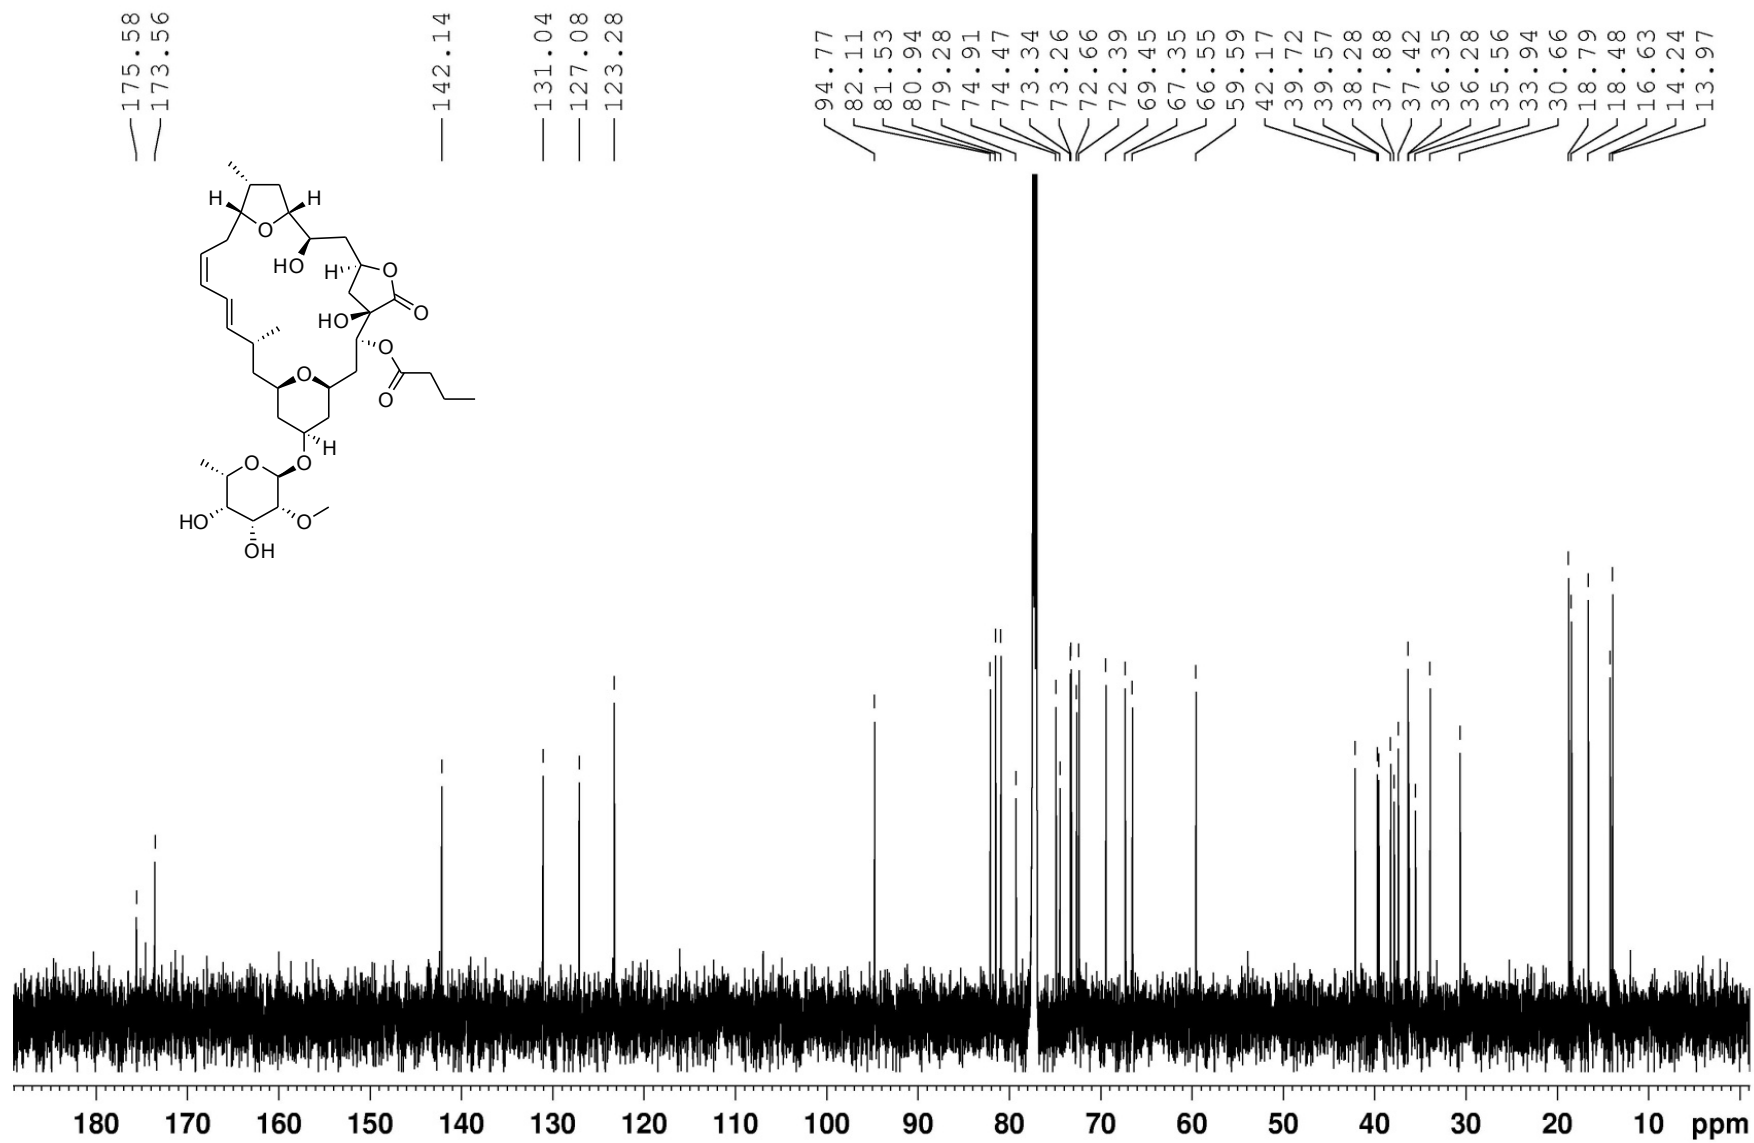

Figure S22. <sup>13</sup>C NMR spectrum for mandelalide B, (2; 175 MHz, CDCl<sub>3</sub>)

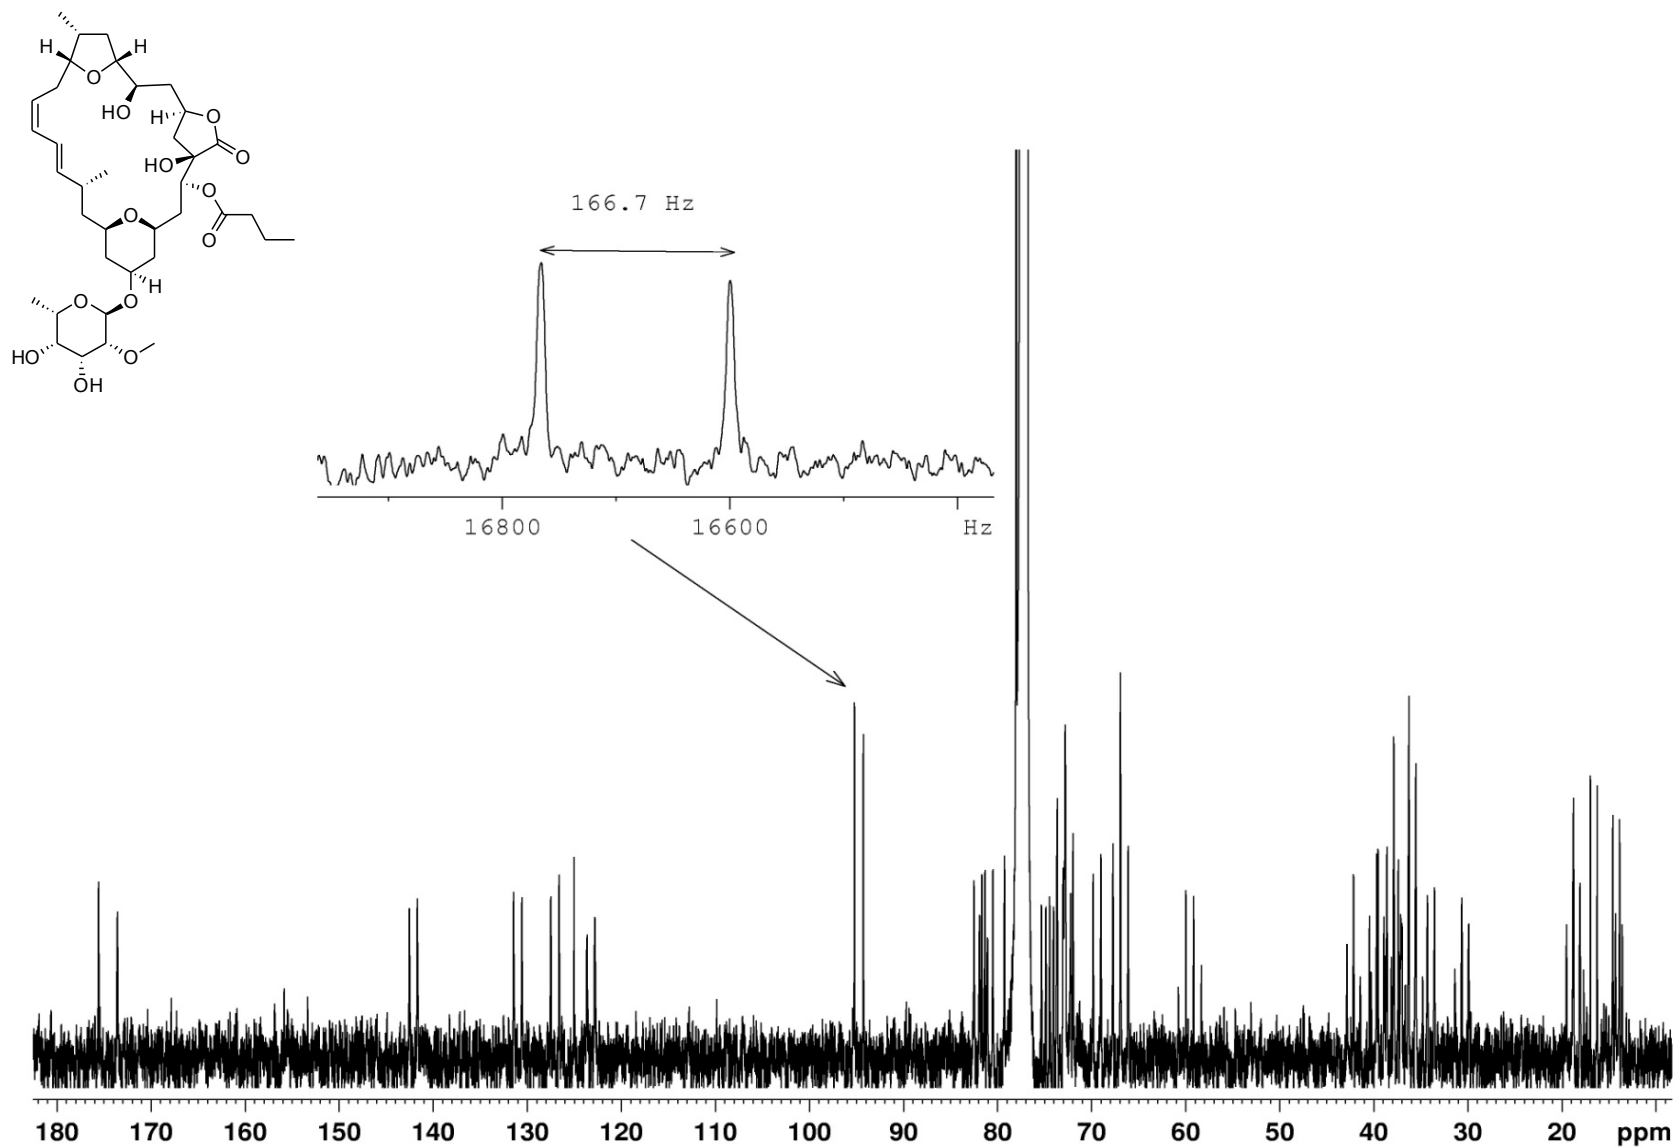

Figure S23.  $^{13}\text{C}$  gated decoupled NMR spectrum for mandelalide B (**2**; 175 MHz,  $\text{CDCl}_3$ )

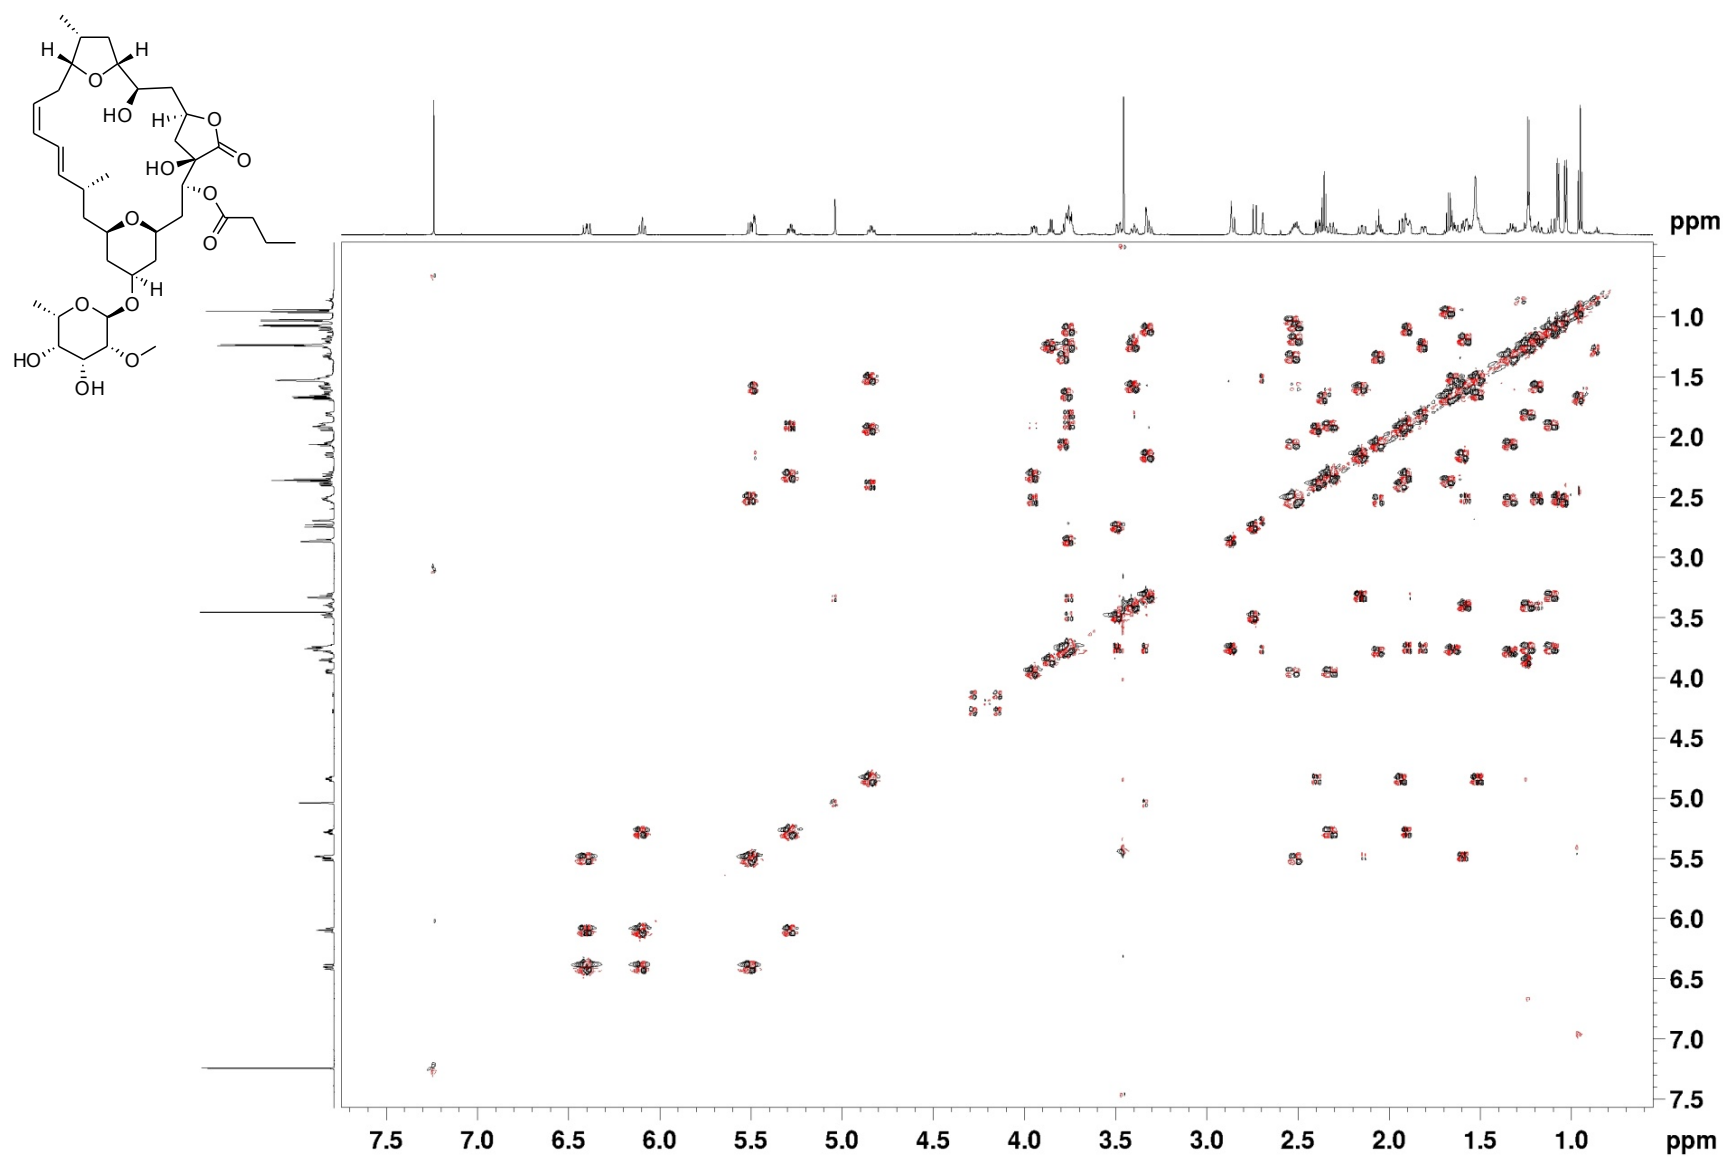

Figure S24. COSY NMR spectrum for mandelalide B, (**2**; 700 MHz, CDCl<sub>3</sub>)

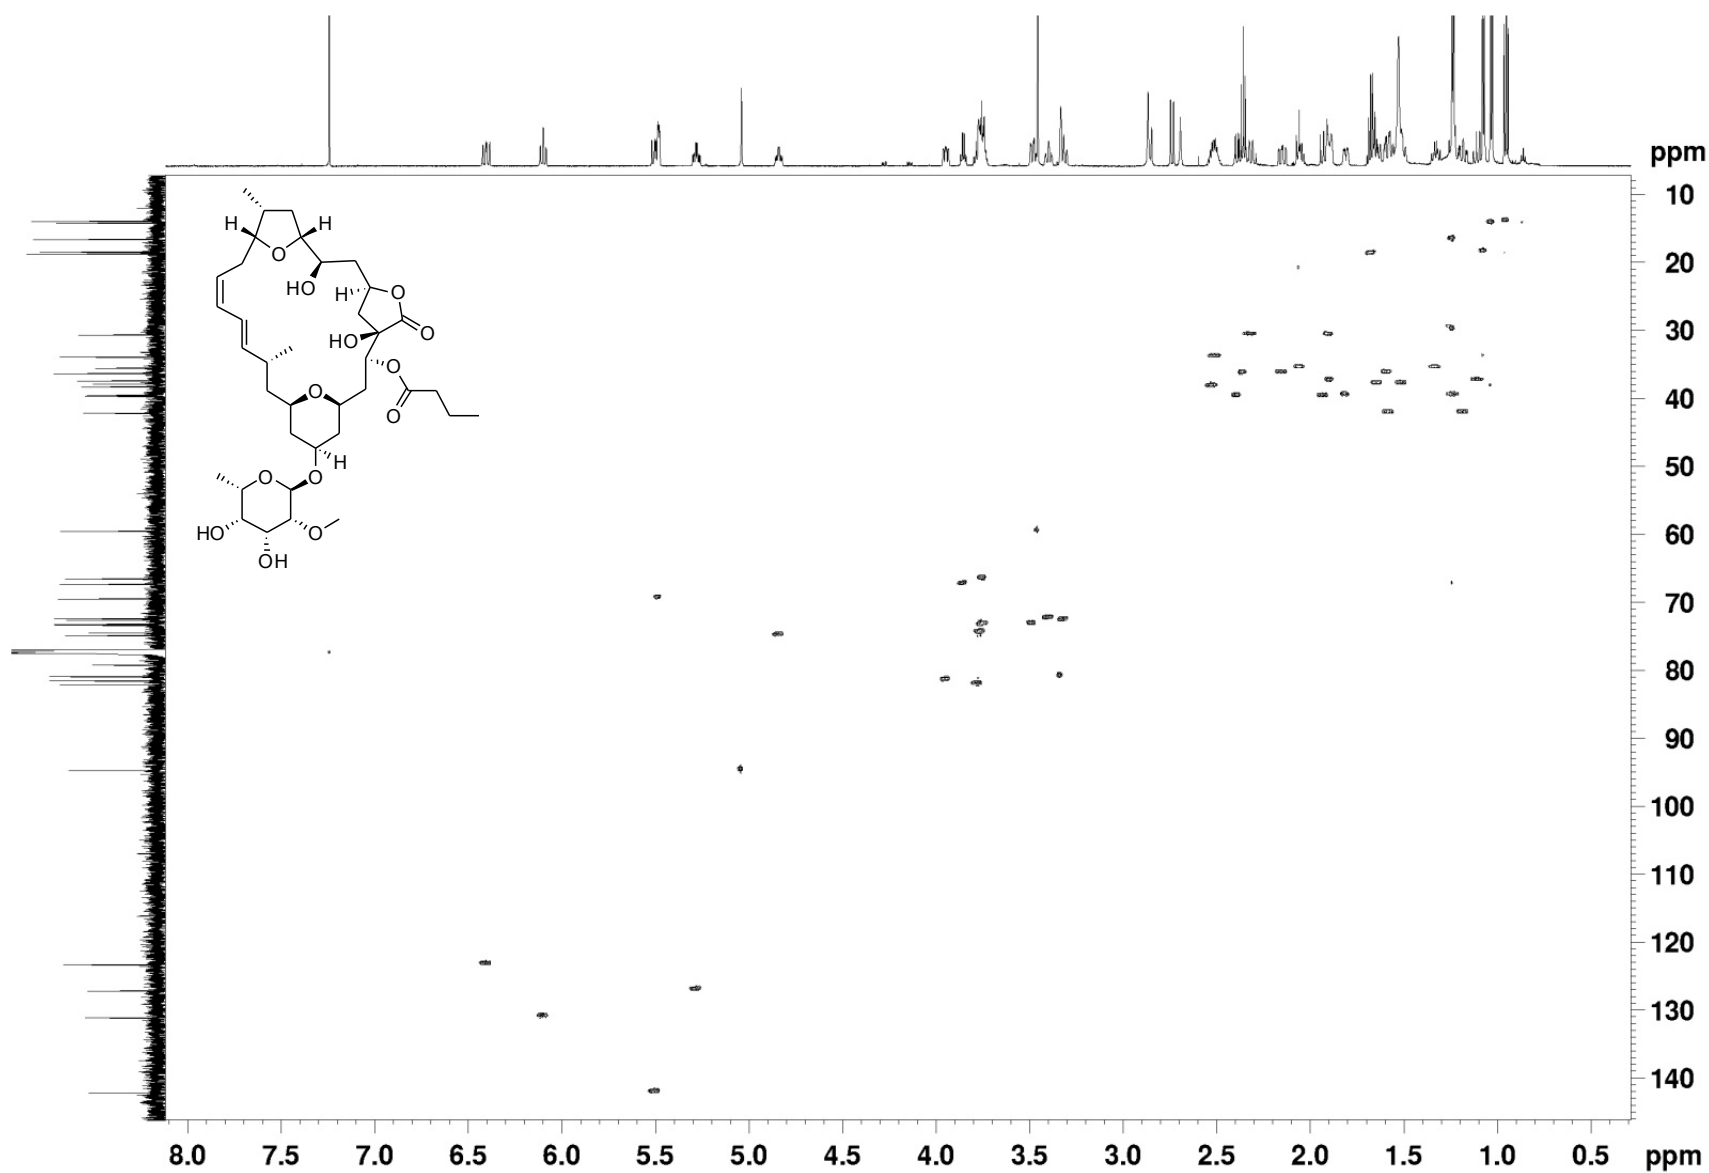

Figure S25. HSQC NMR spectrum for mandelalide B, (2; 700 MHz, CDCl<sub>3</sub>)

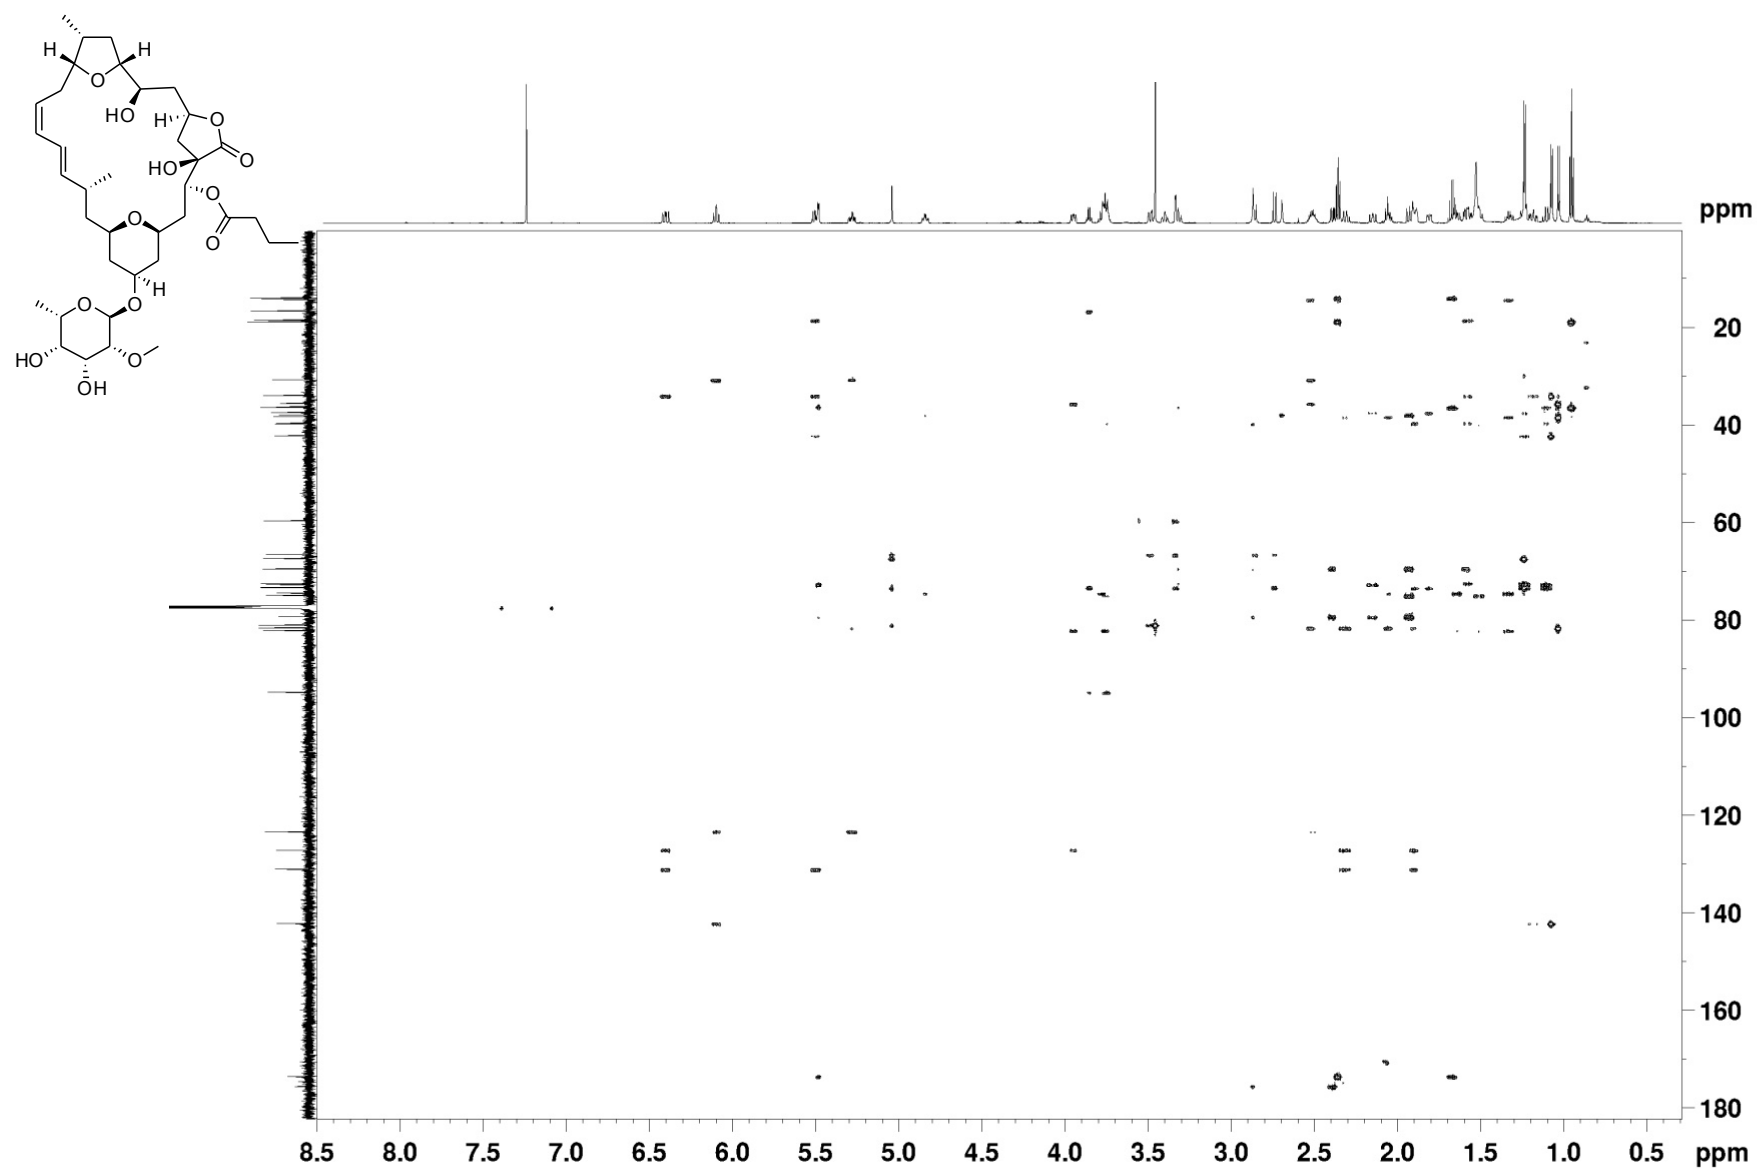

Figure S26. HMBC NMR spectrum for mandelalide B, (2; 700 MHz, CDCl<sub>3</sub>)

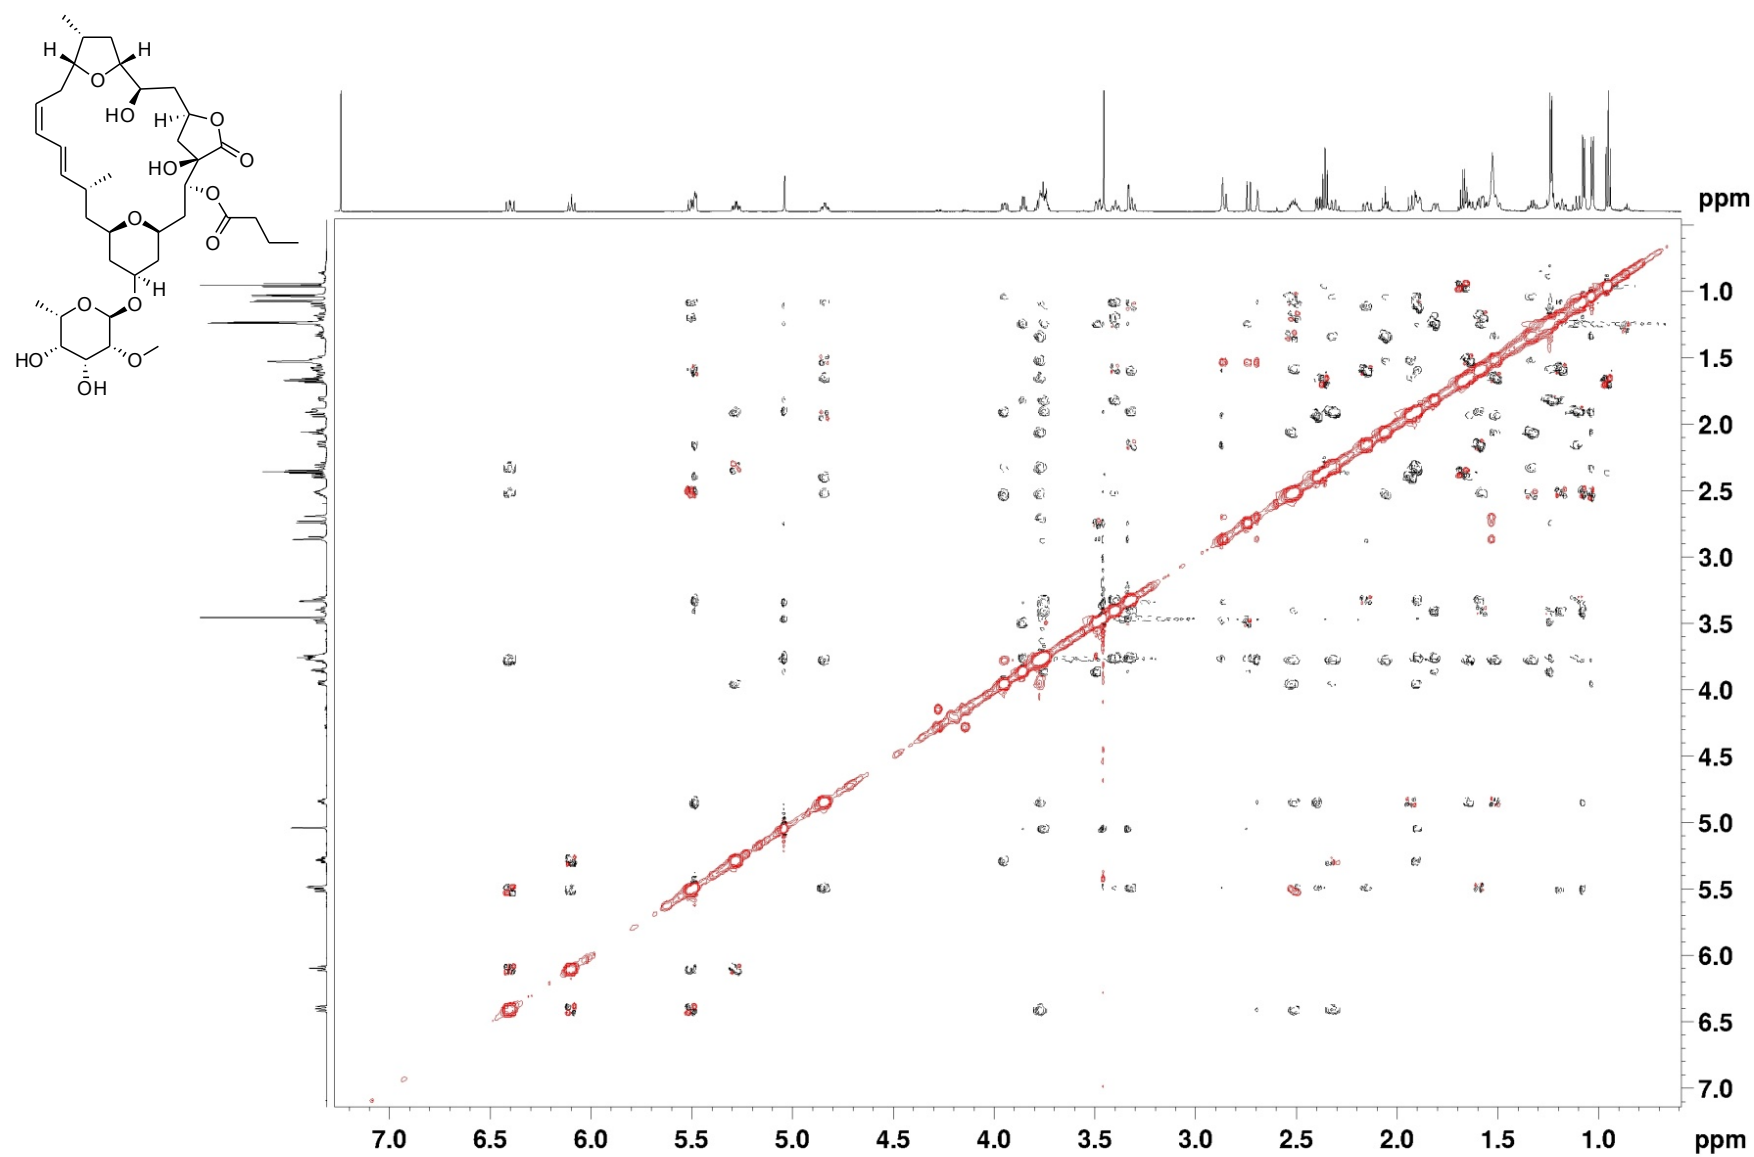

Figure S27. ROESY NMR spectrum for mandelalide B, (2; 700 MHz, CDCl<sub>3</sub>)



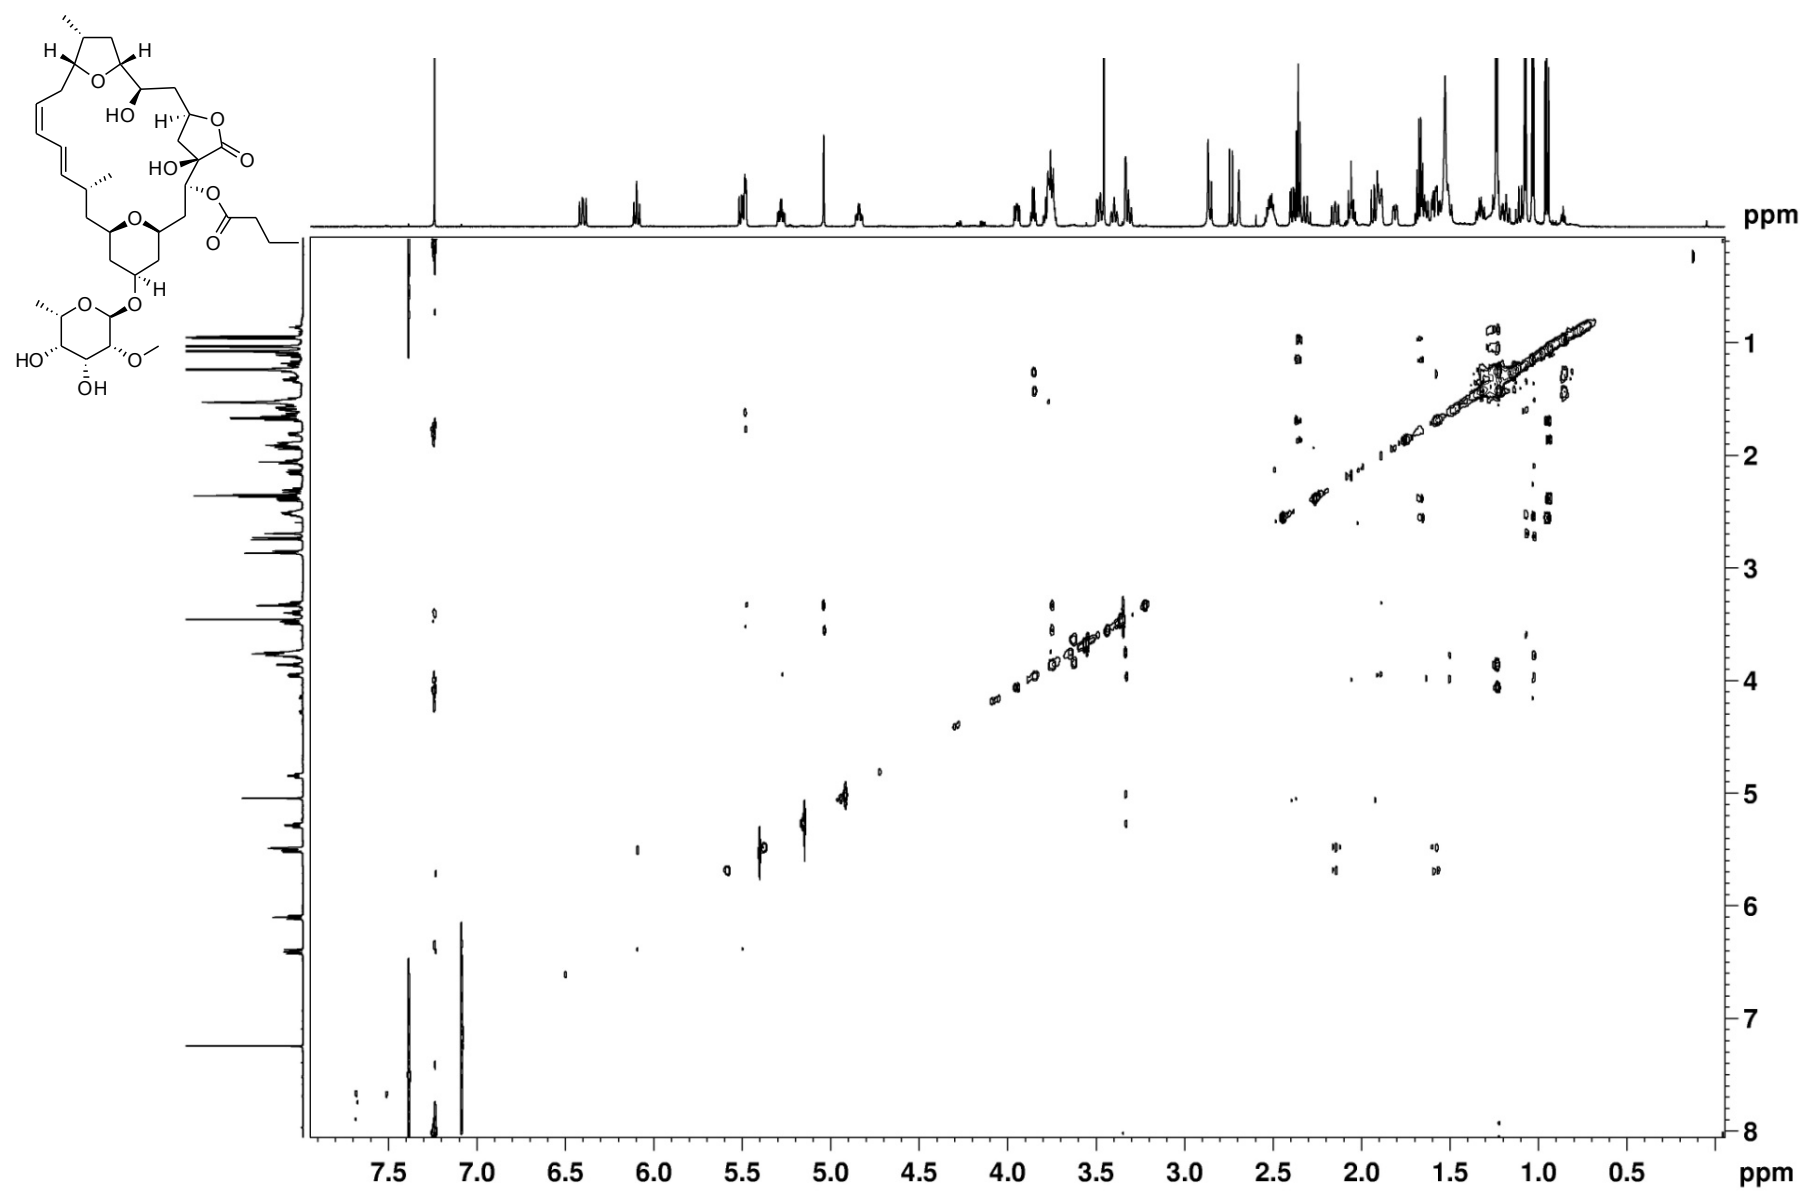

Figure S28. HETLOC NMR spectrum for mandelalide B, (2; 700 MHz, CDCl<sub>3</sub>)



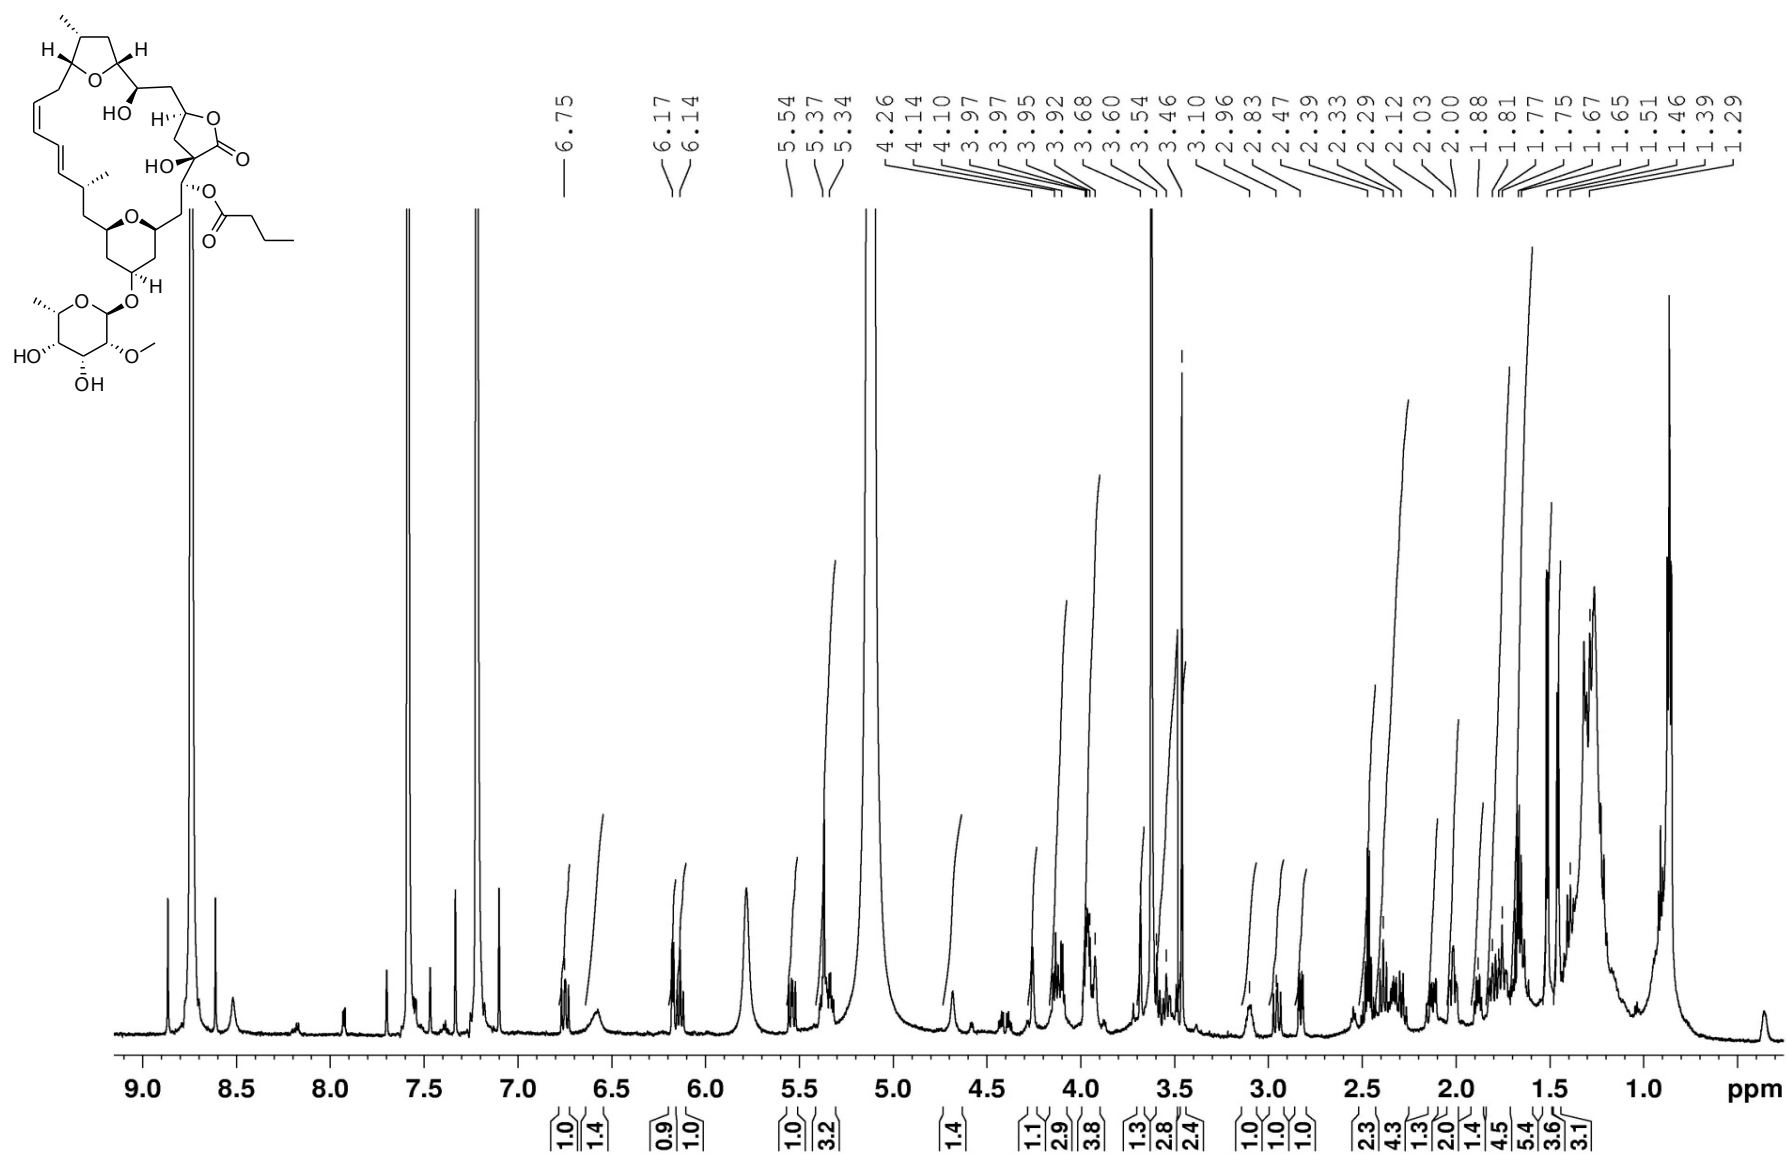

Figure S30. <sup>1</sup>H NMR spectrum for mandelalide B, (2; 700 MHz, py-d<sub>5</sub>)

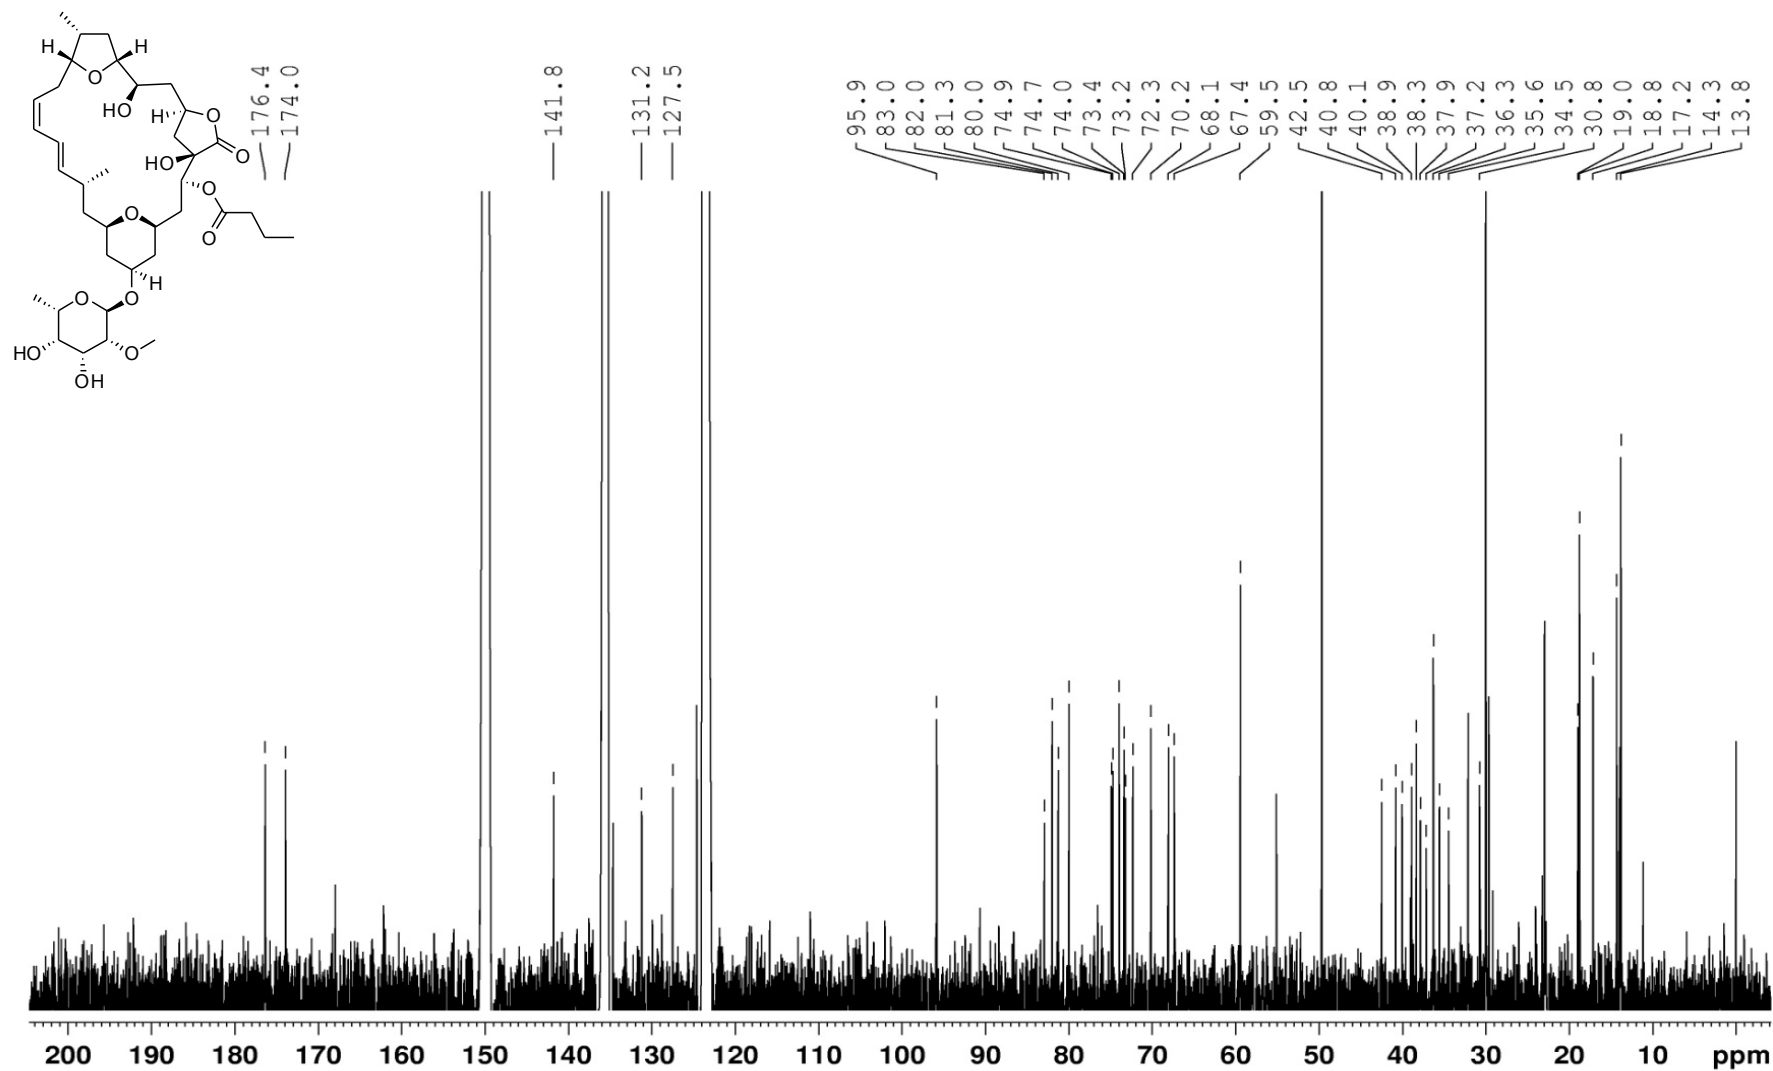

Figure S31. <sup>13</sup>C NMR spectrum for mandelalide B (**2**; 175 MHz, py-*d*<sub>5</sub>)

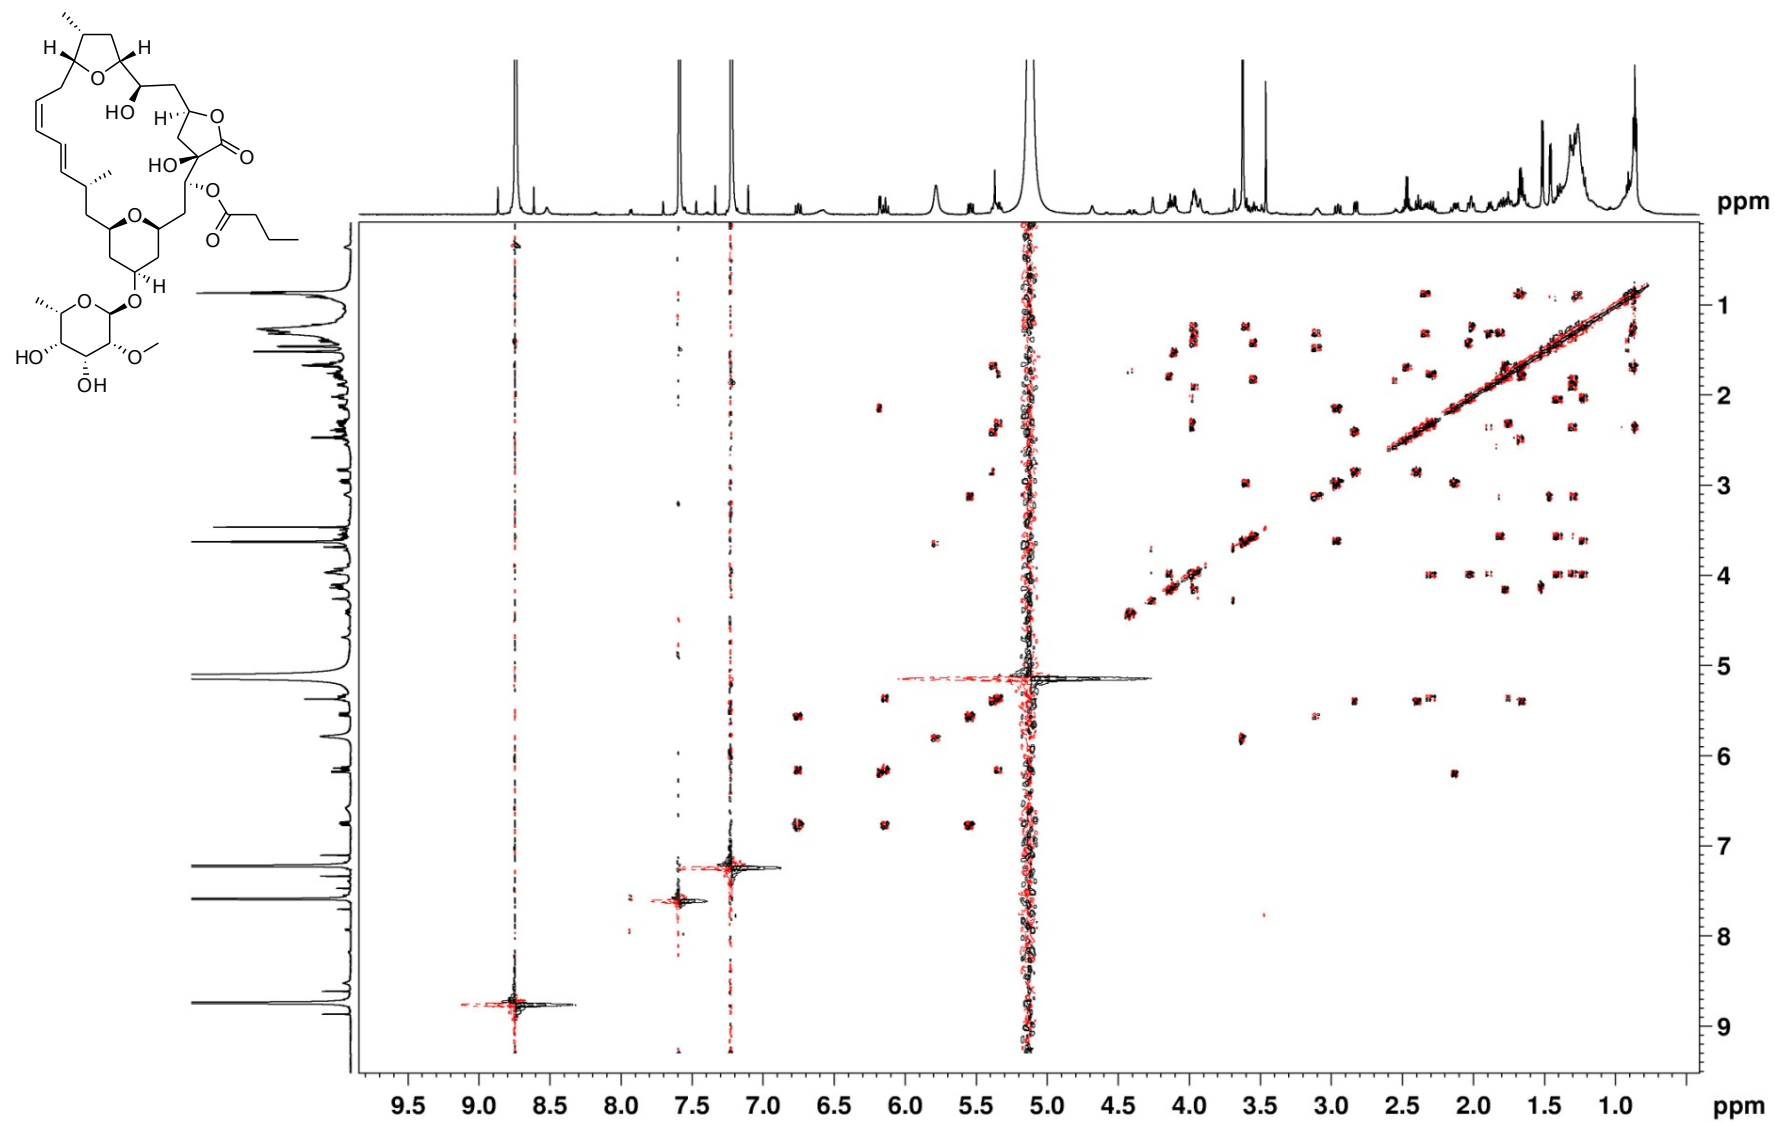

Figure S32. COSY NMR spectrum for mandelalide B (2; 700 MHz,  $py-d_5$ )

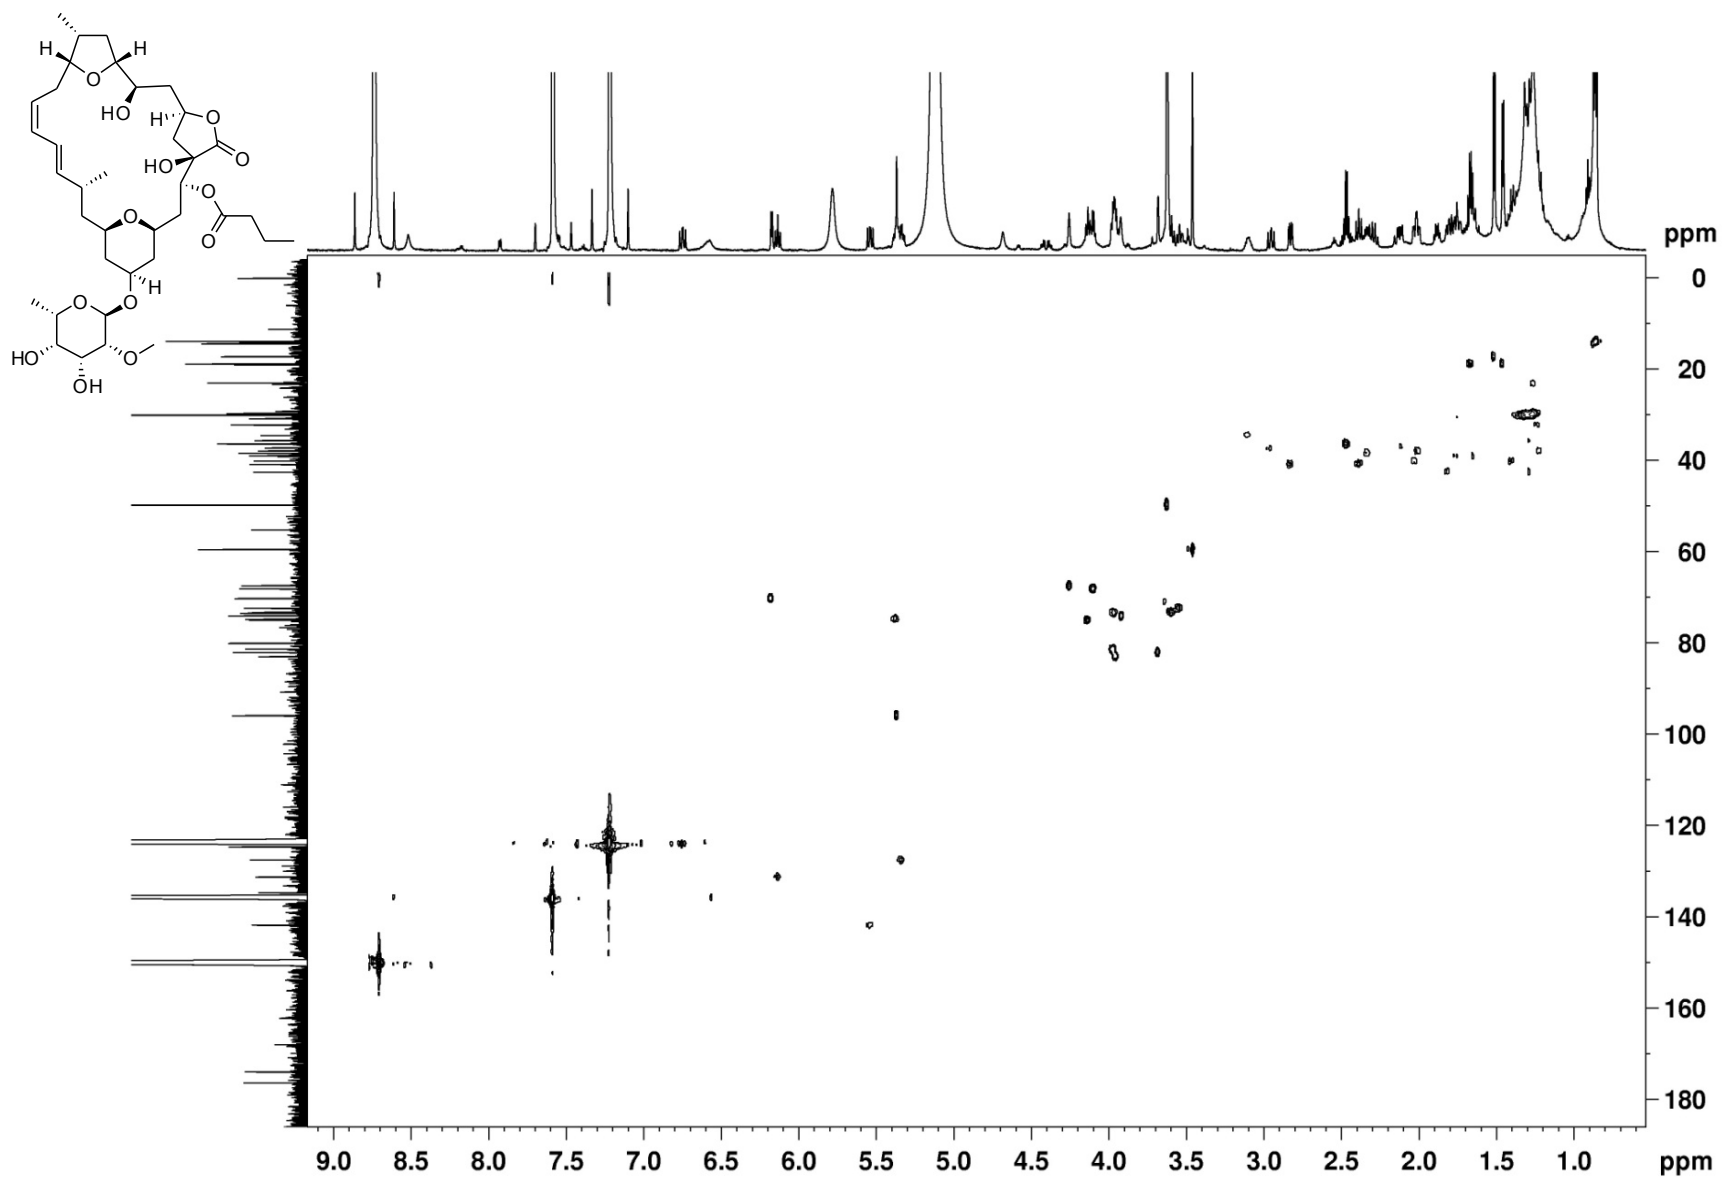

Figure S33. HSQC NMR spectrum for mandelalide B, (**2**; 700 MHz, py-*d*<sub>5</sub>)

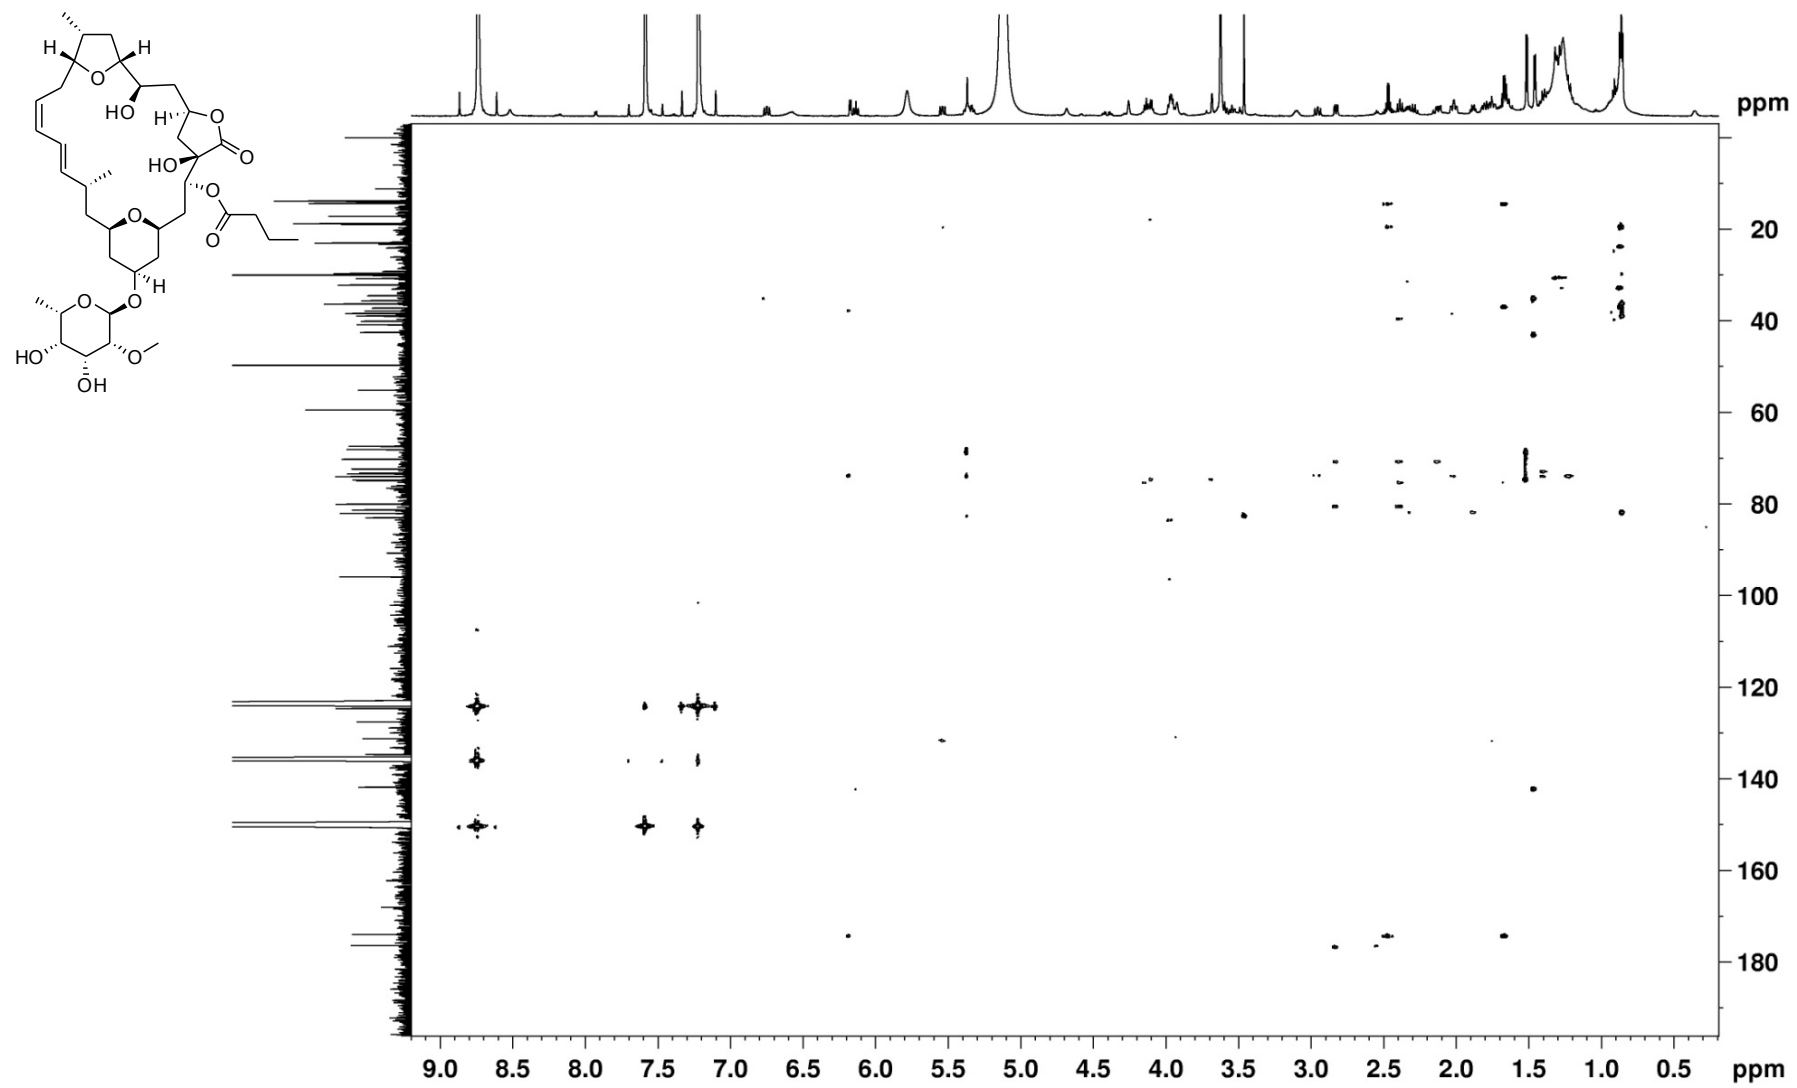

Figure S34. HMBC NMR spectrum for mandelalide B (**2**; 700 MHz,  $\text{py-d}_5$ )

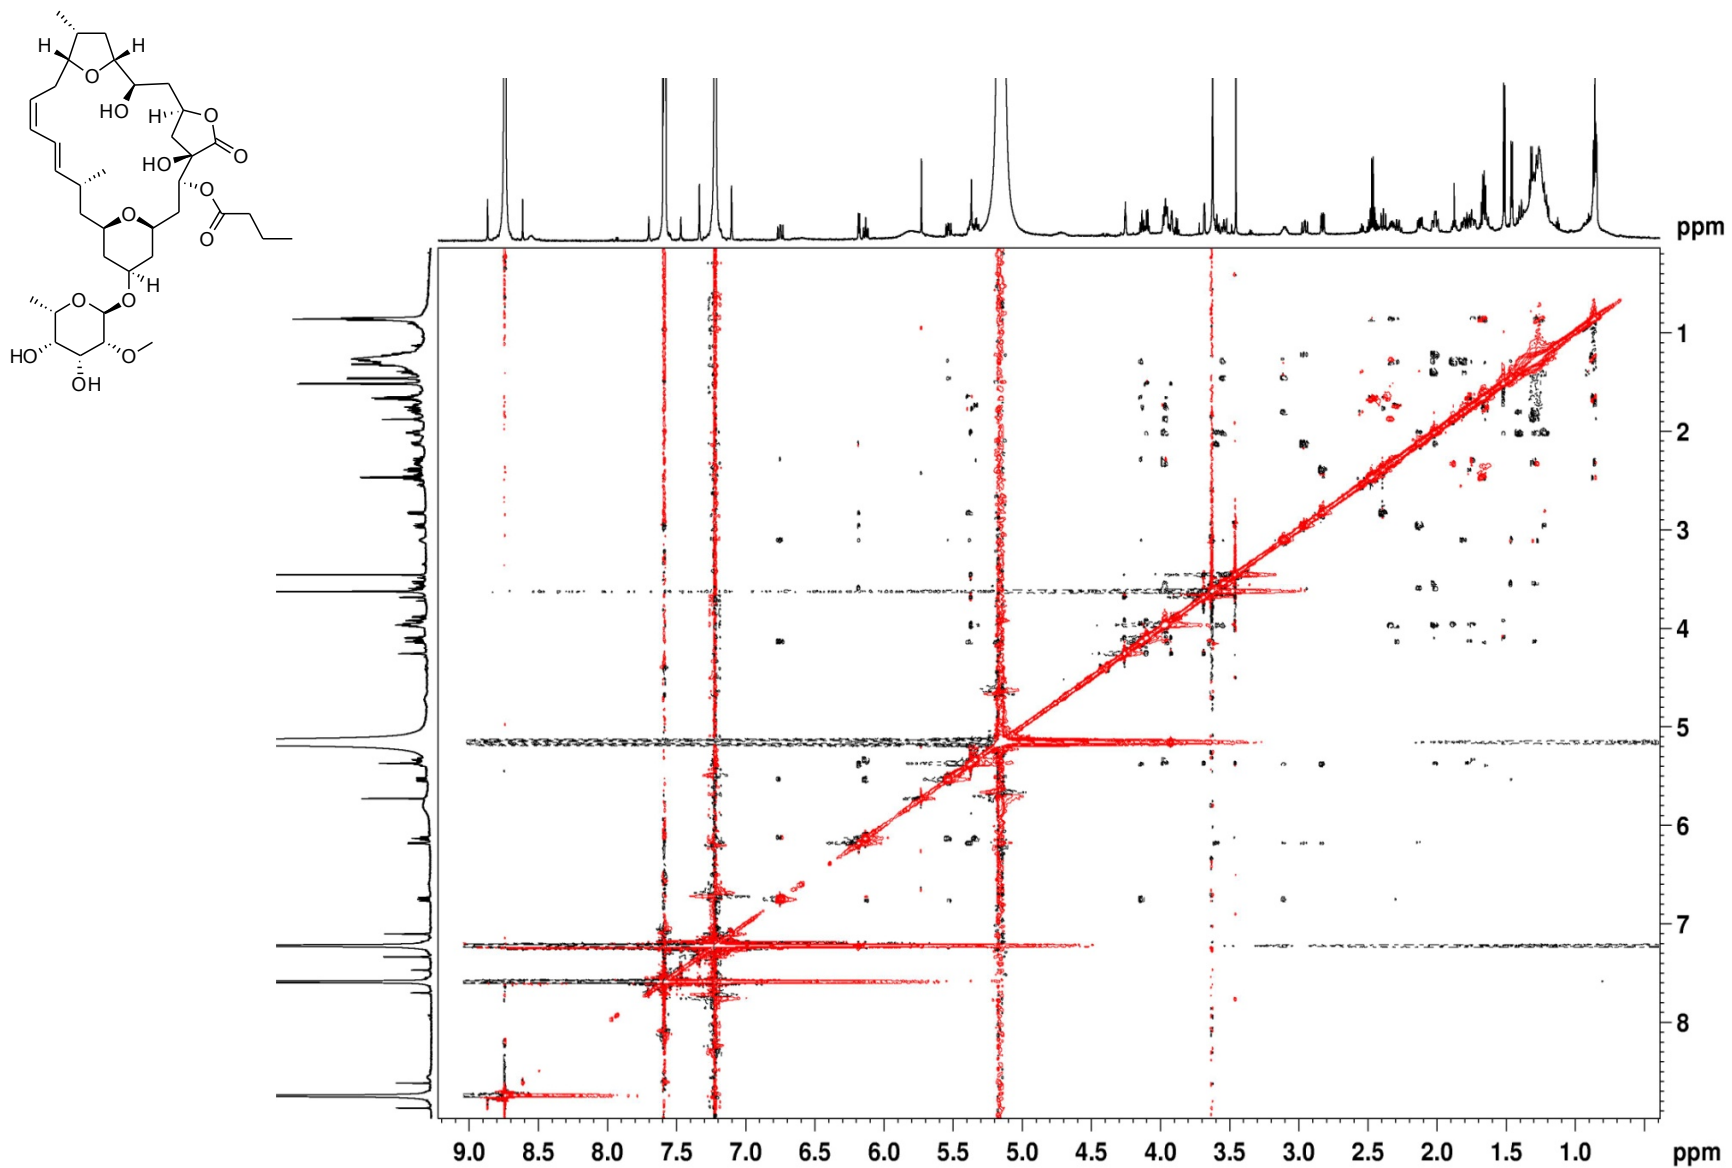

Figure S35. ROESY NMR spectrum for mandelalide B (2), spinlock mixing time 400 ms, (700 MHz, *py-d*<sub>5</sub>)



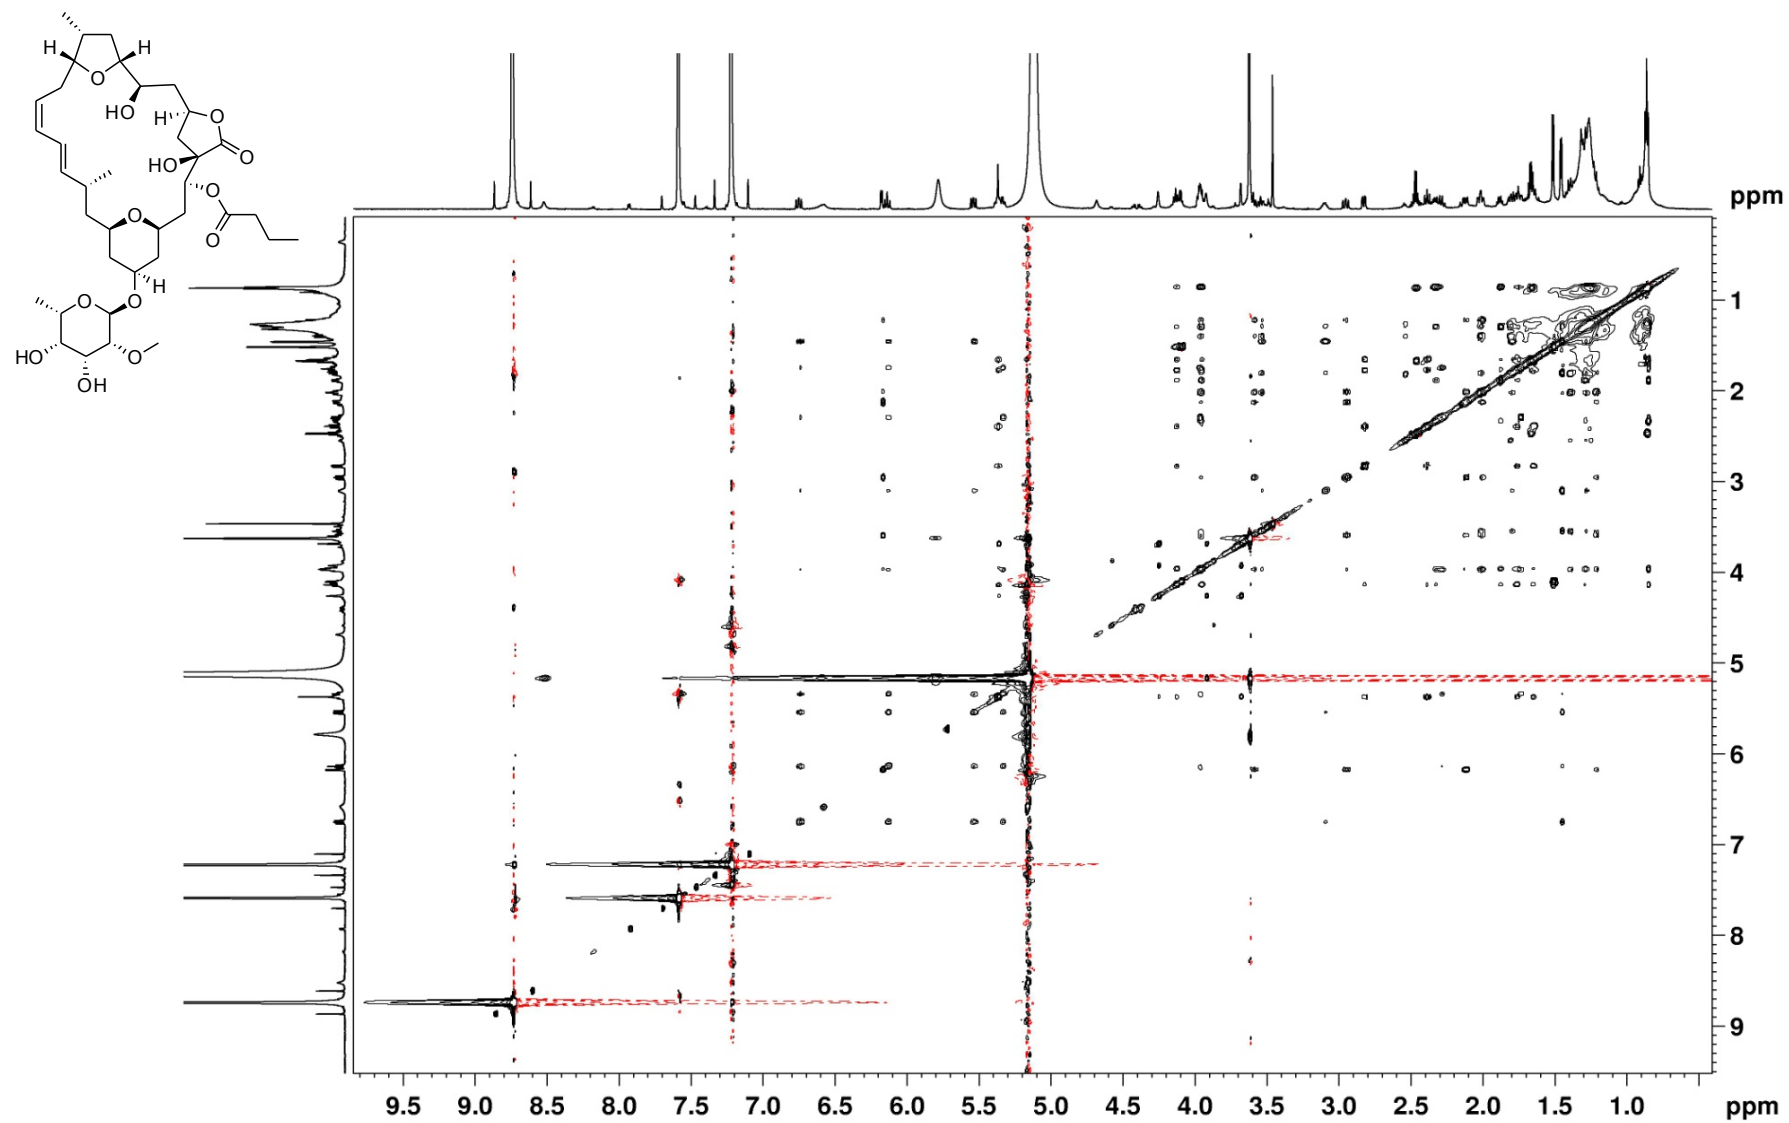

Figure S36. TOCSY NMR spectrum for mandelalide B, (2; 700 MHz, py-*d*<sub>5</sub>)

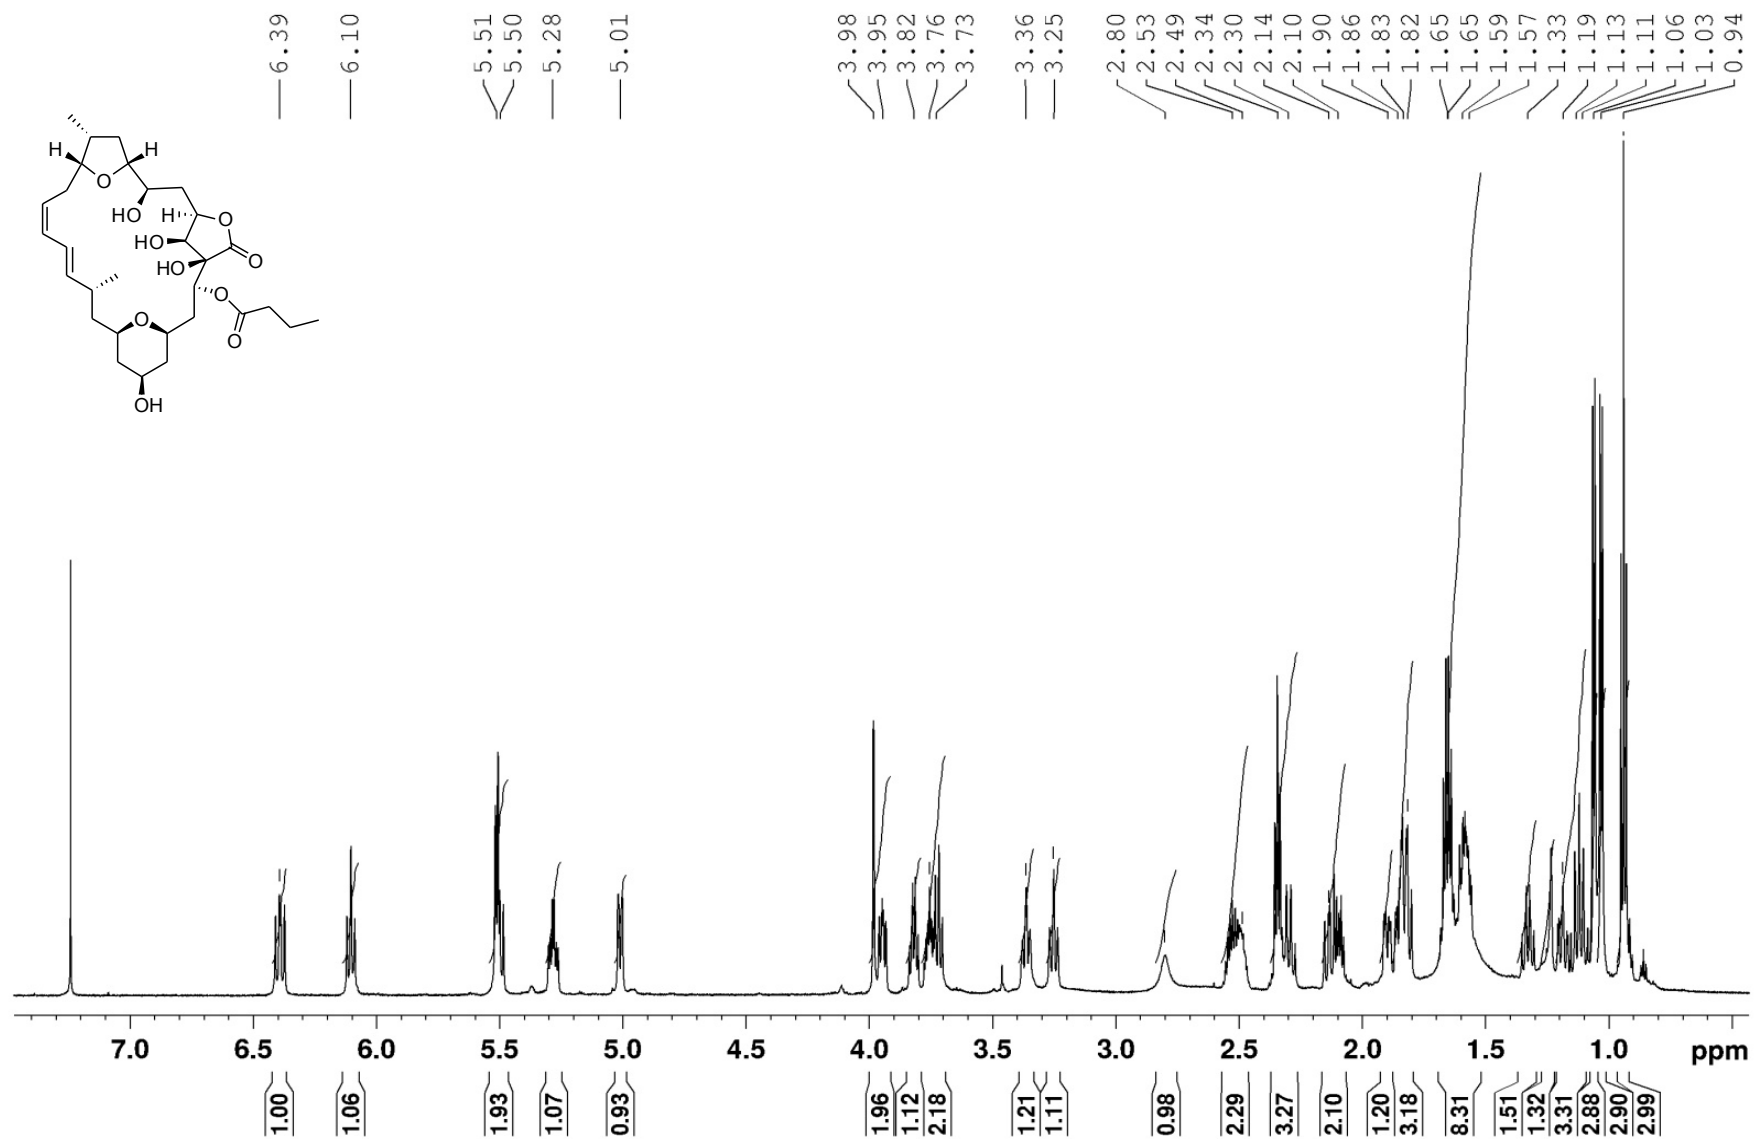

Figure S37.  $^1\text{H}$  NMR spectrum for mandelalide C (**3**; 700 MHz,  $\text{CDCl}_3$ )

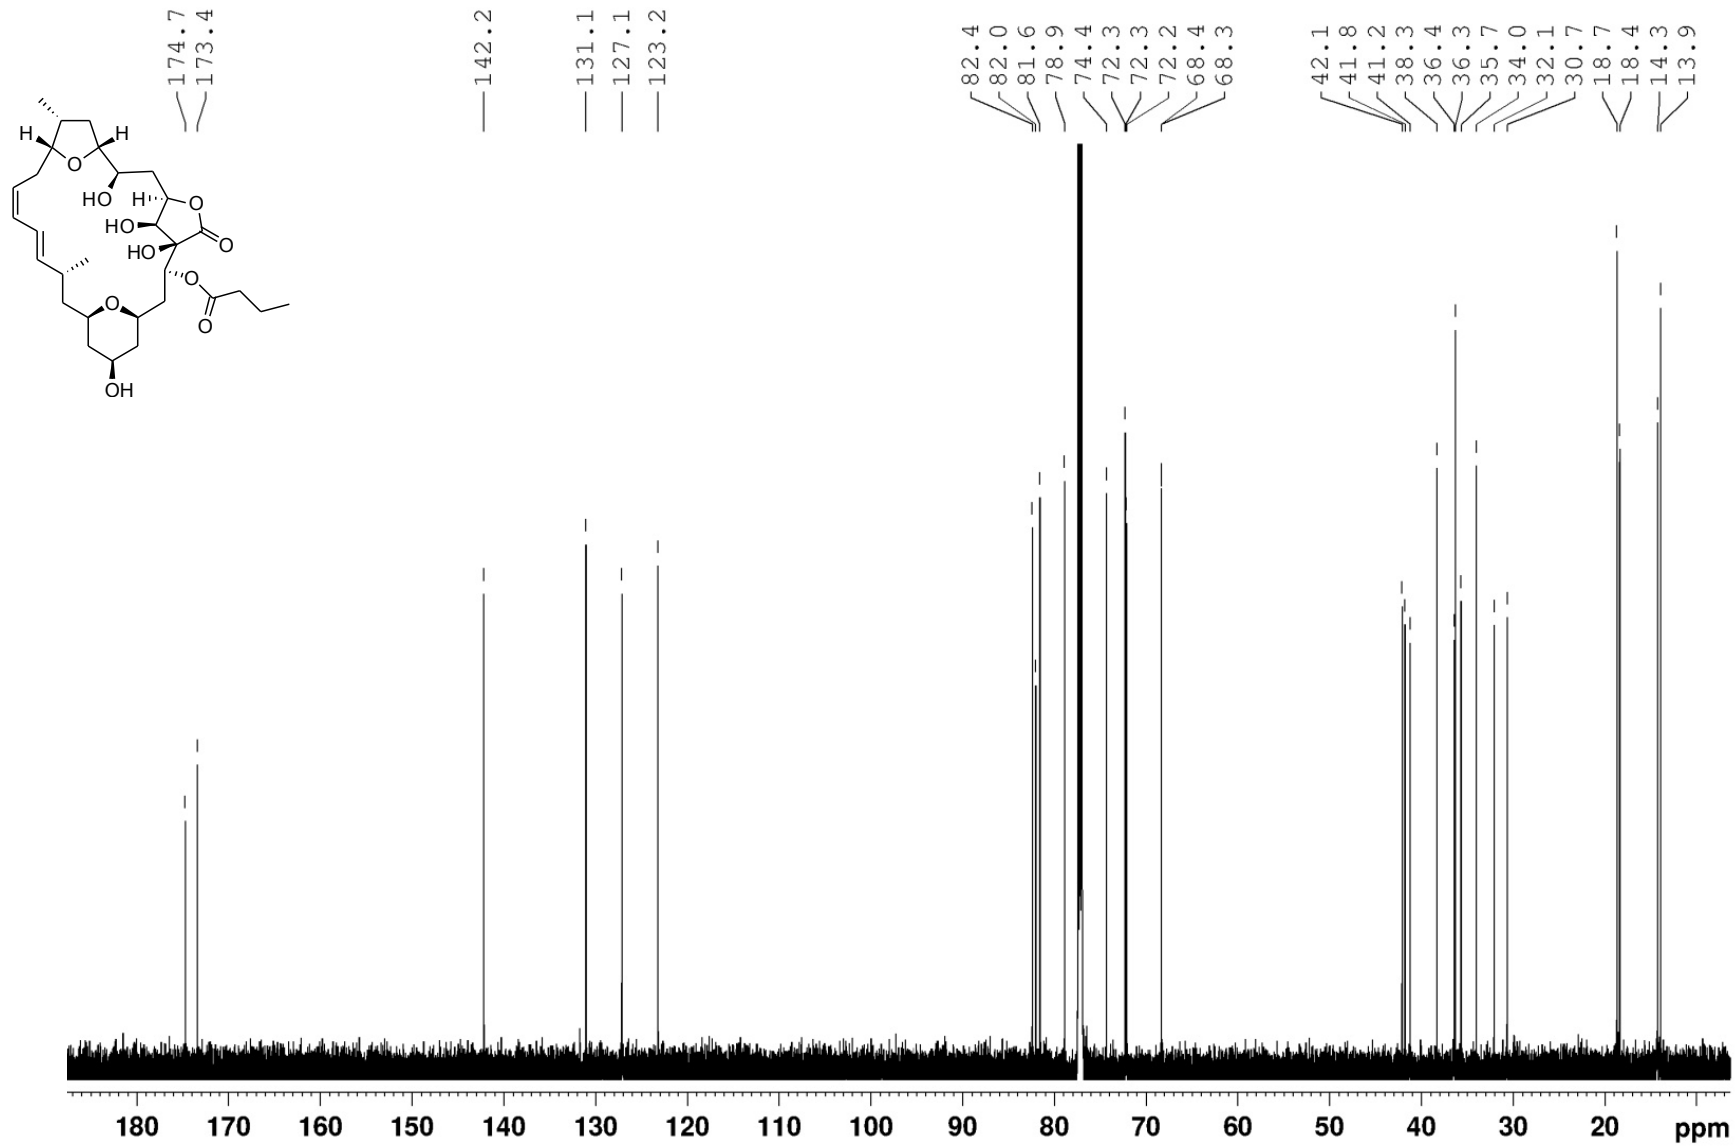

Figure S38. <sup>13</sup>C NMR spectrum for mandelalide C (**3**; 175 MHz, CDCl<sub>3</sub>)

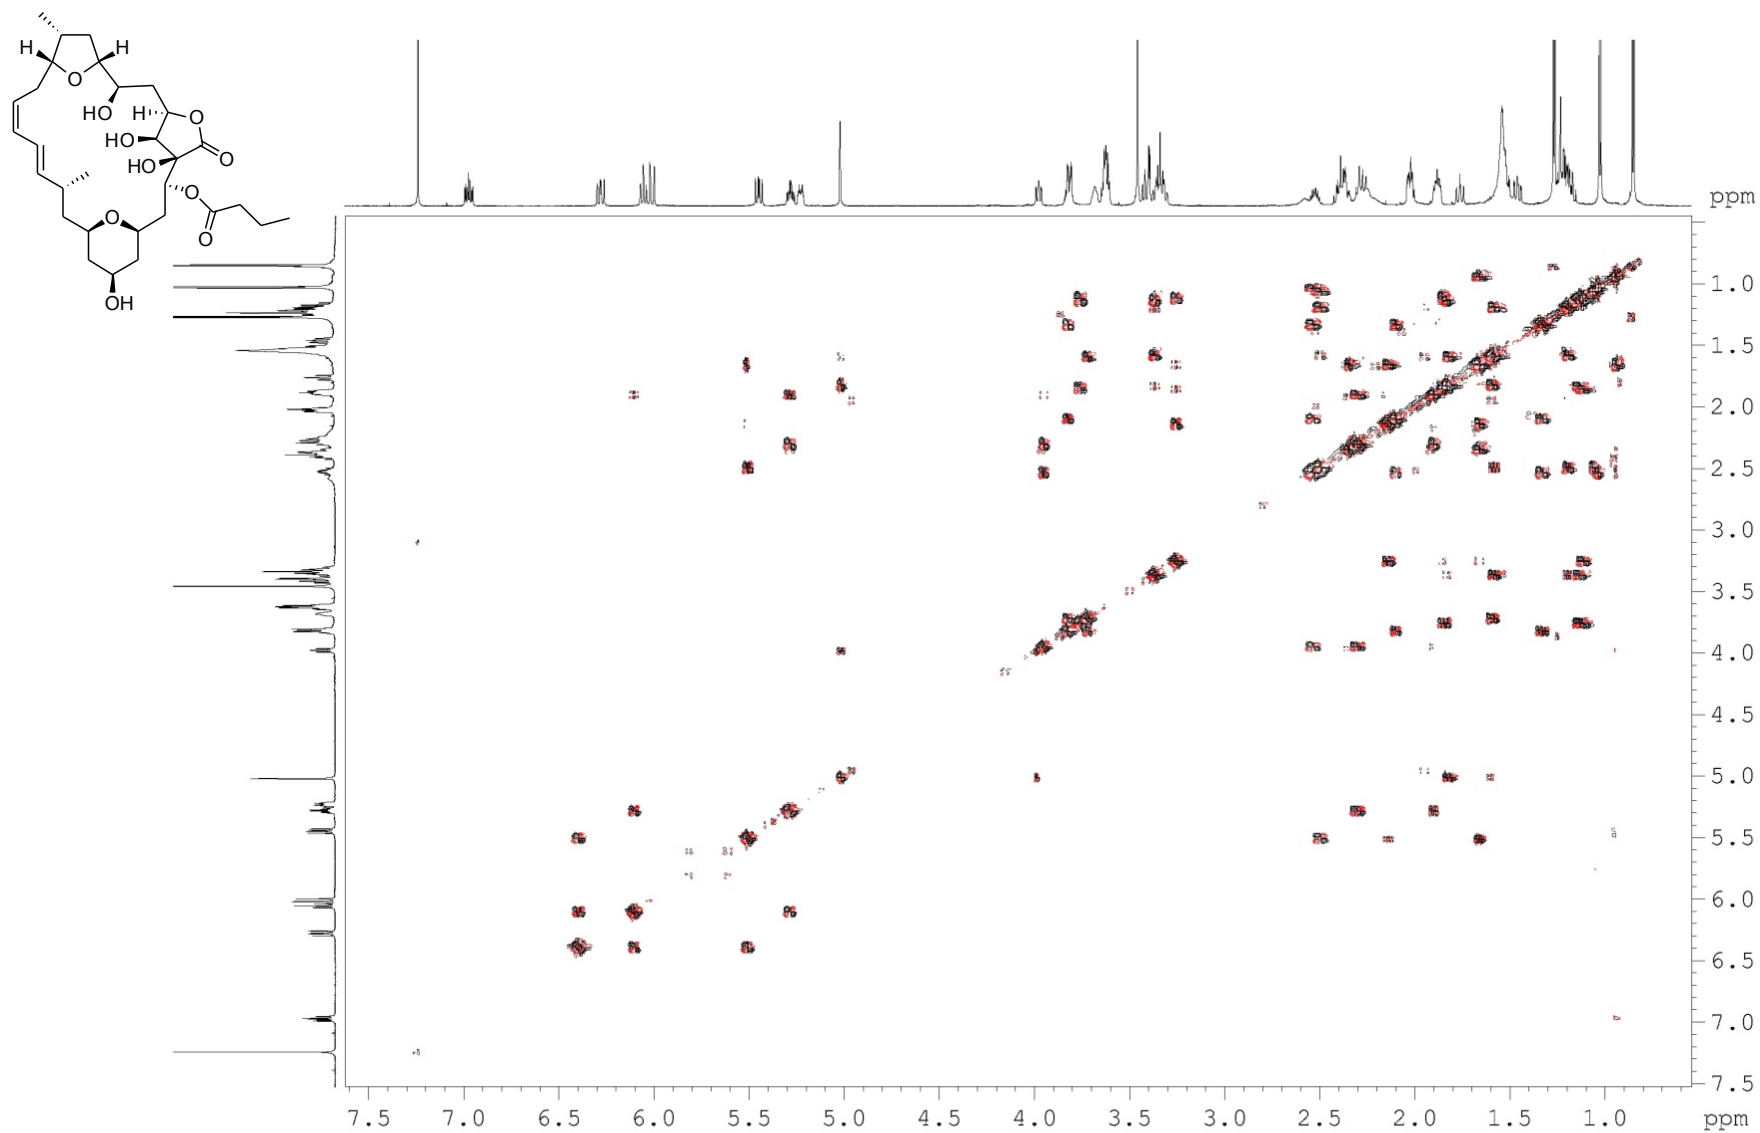

Figure S39. COSY NMR spectrum for mandelalide C (**3**; 700 MHz, CDCl<sub>3</sub>)

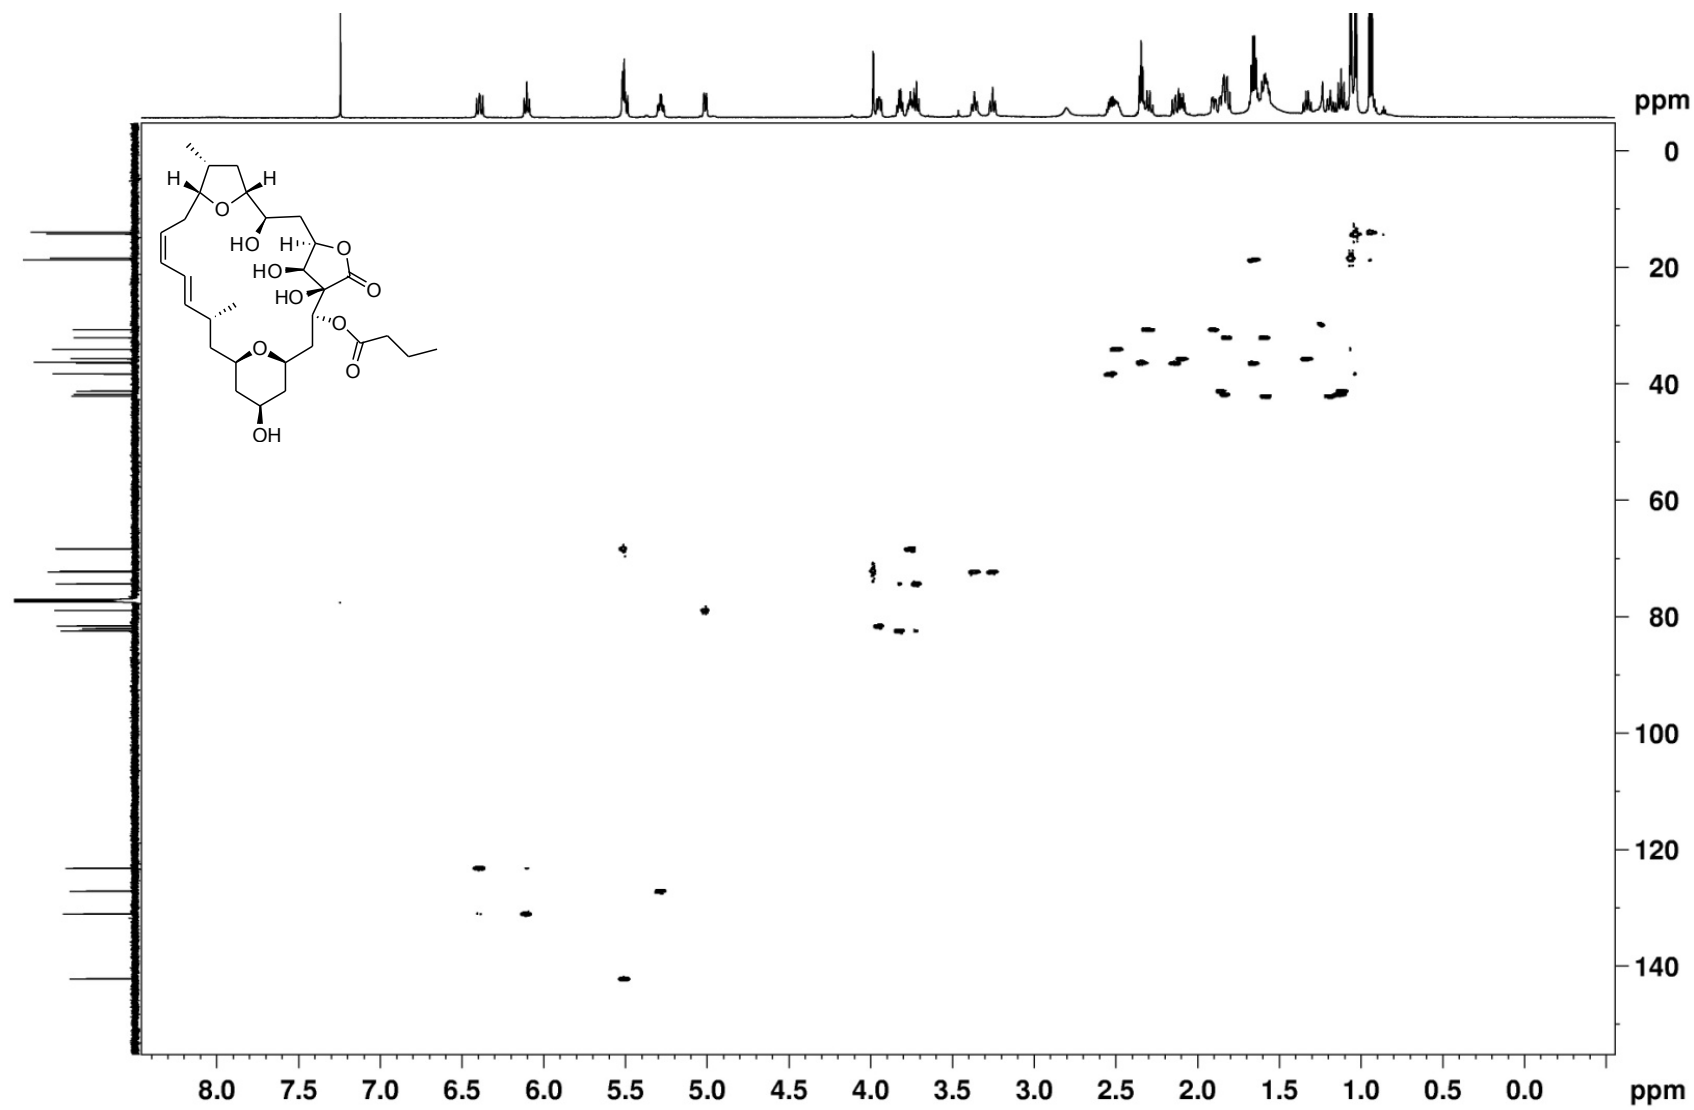

Figure S40. HSQC NMR spectrum for mandelalide C (**3**; 700 MHz, CDCl<sub>3</sub>)

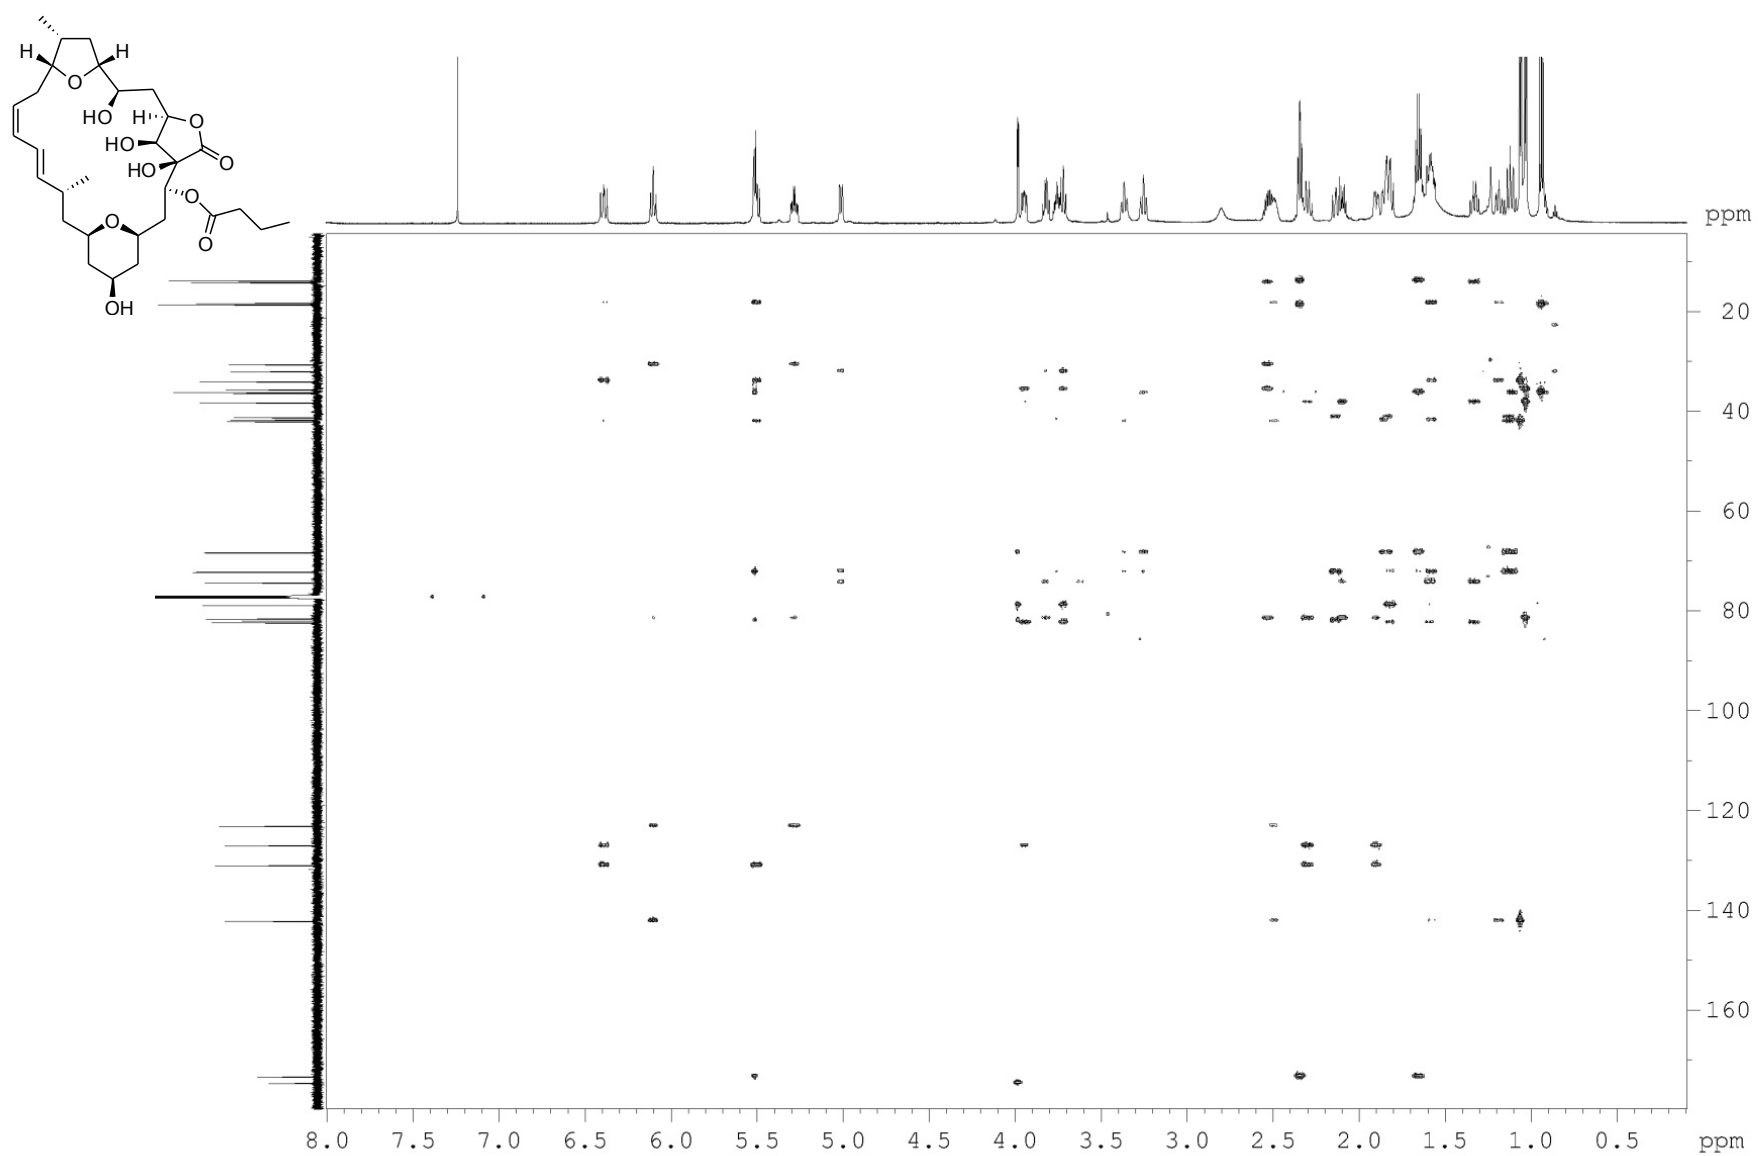

Figure S41. HMBC NMR spectrum for mandelalide C (**3**; 700 MHz, CDCl<sub>3</sub>)

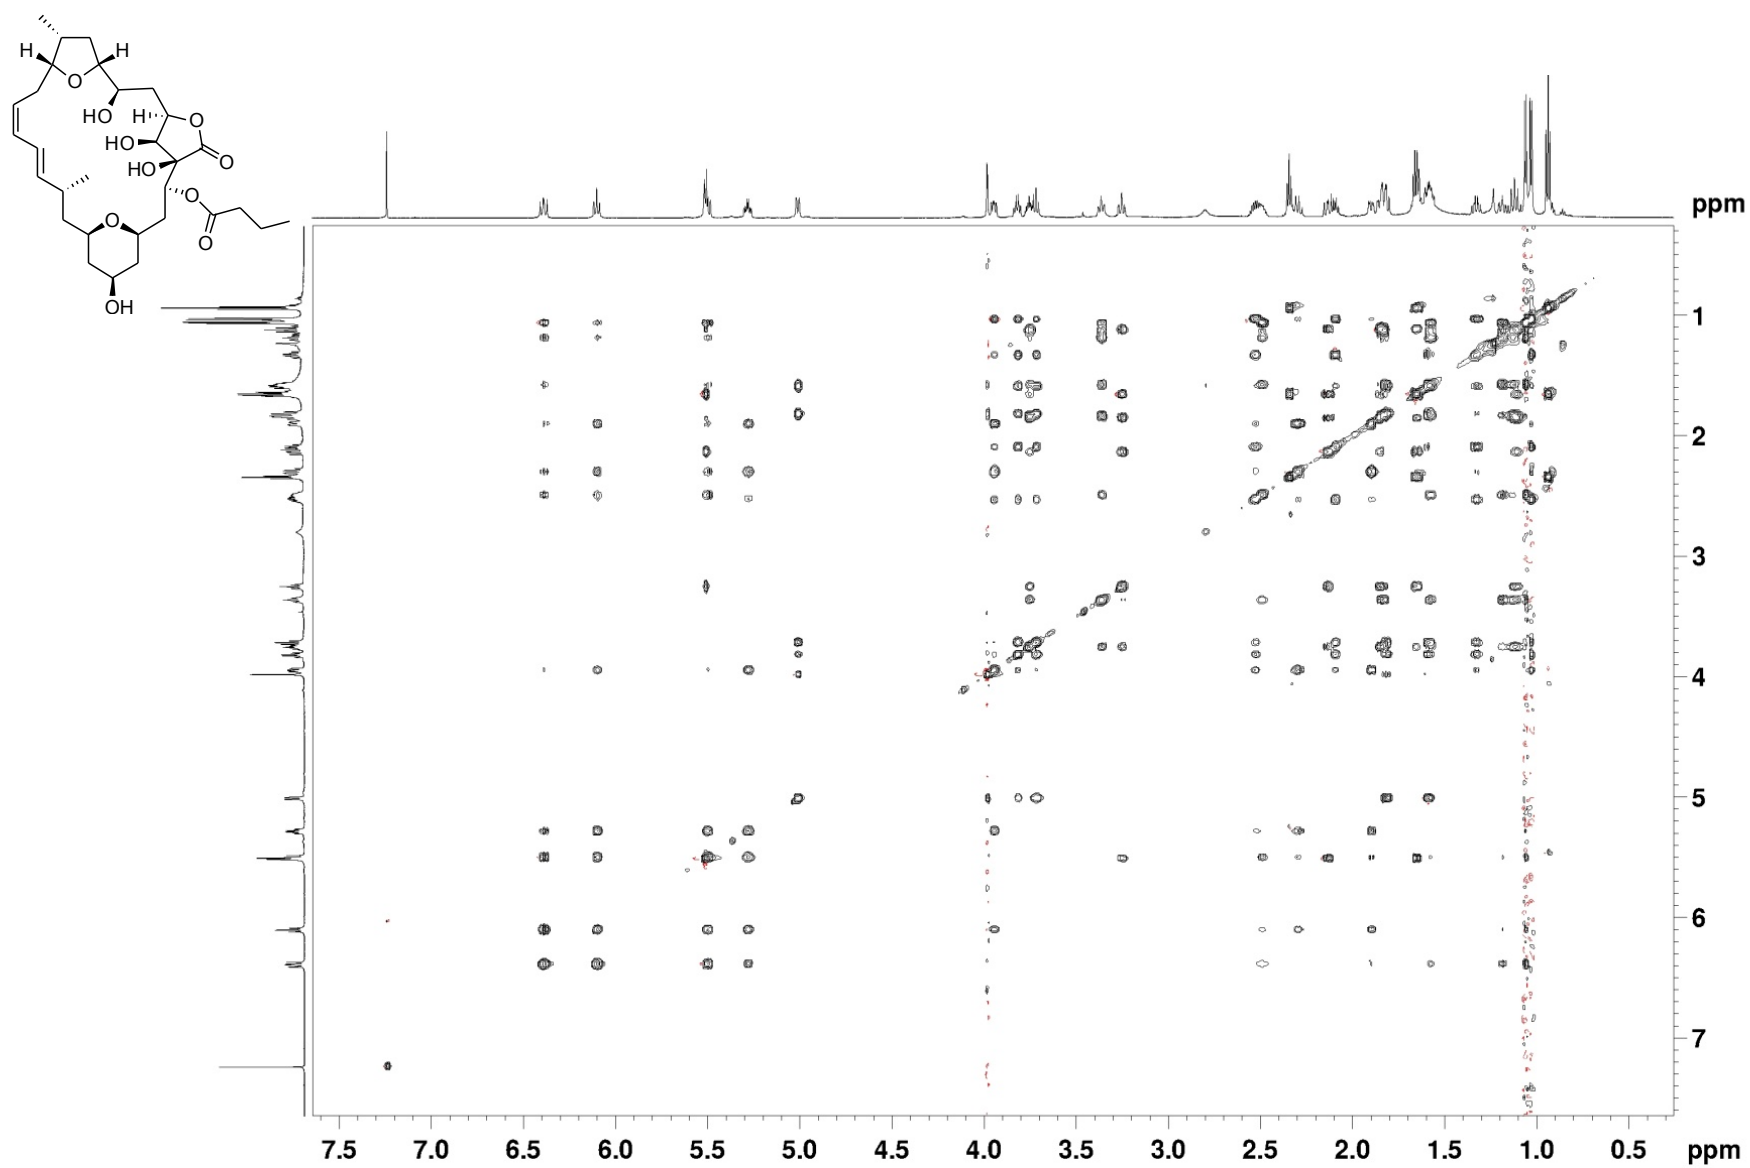

Figure S42. TOCSY NMR spectrum for mandelalide C (3; 700 MHz, CDCl<sub>3</sub>)

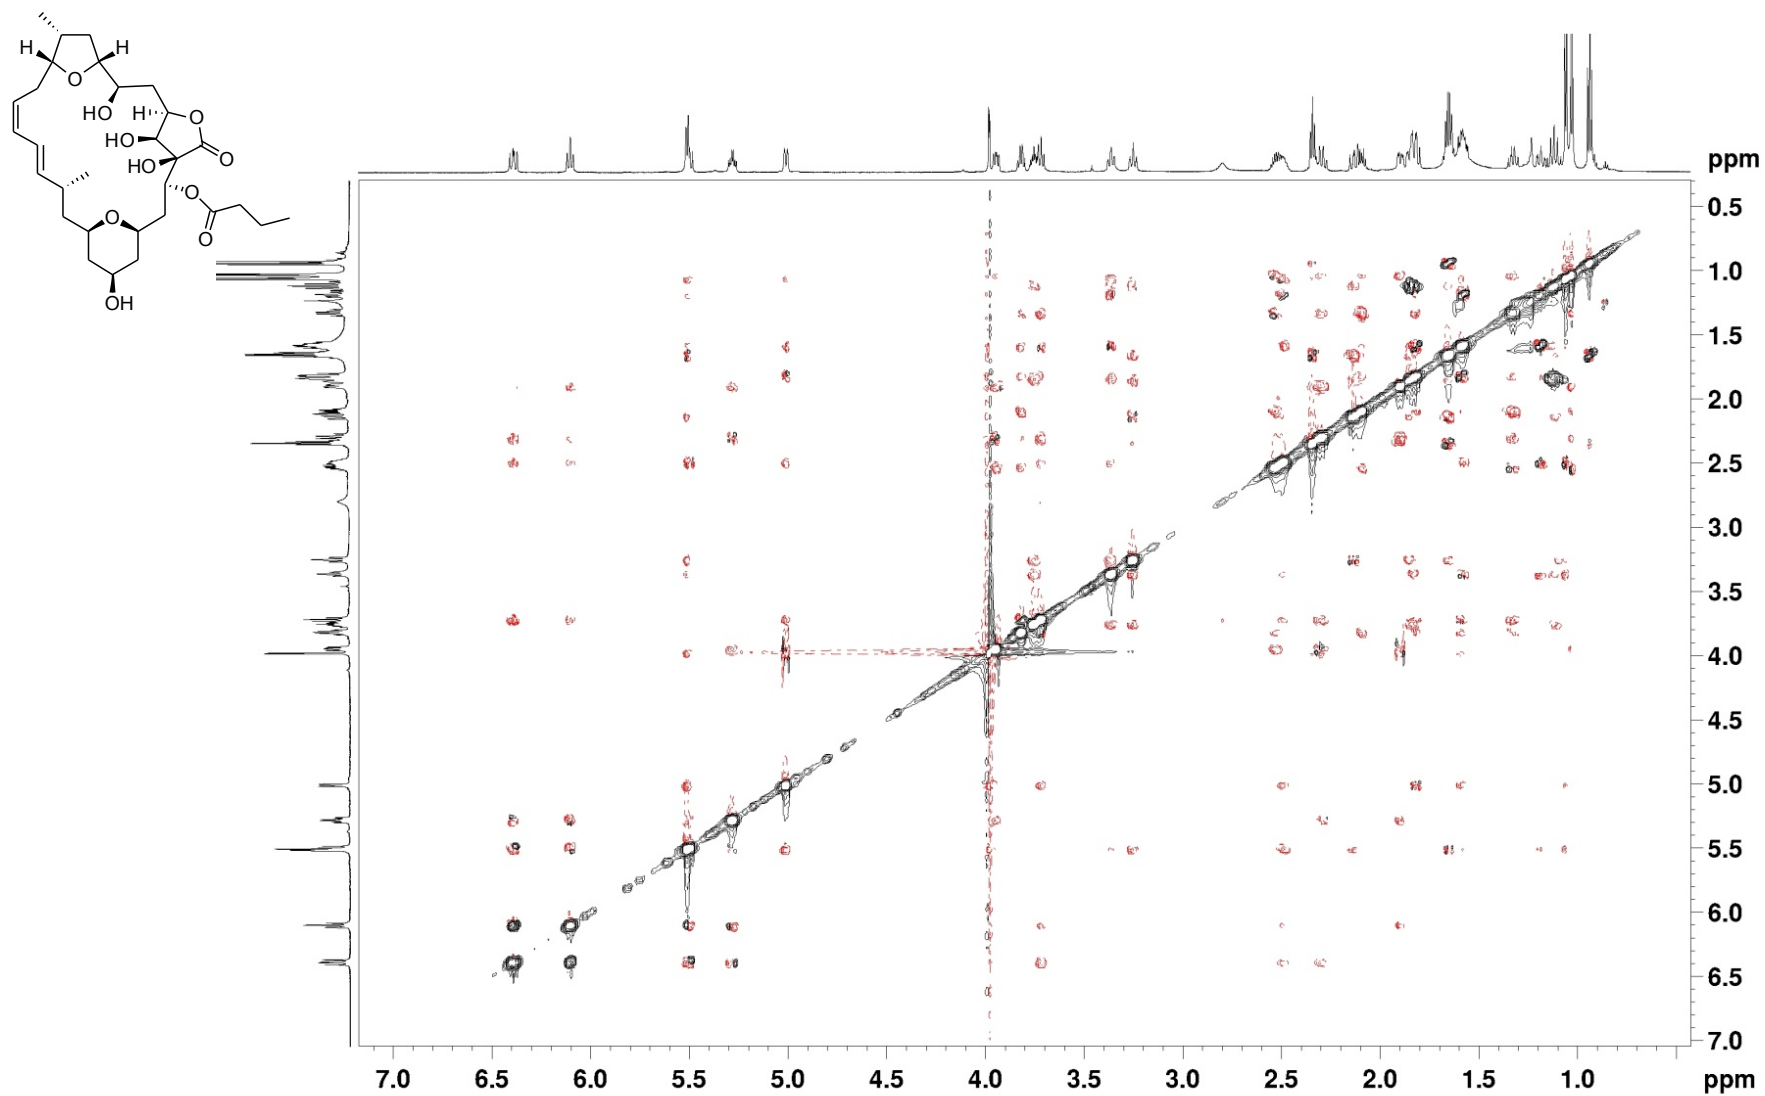

Figure S43. ROESY NMR spectrum for mandelalide C (**3**; 700 MHz, CDCl<sub>3</sub>)



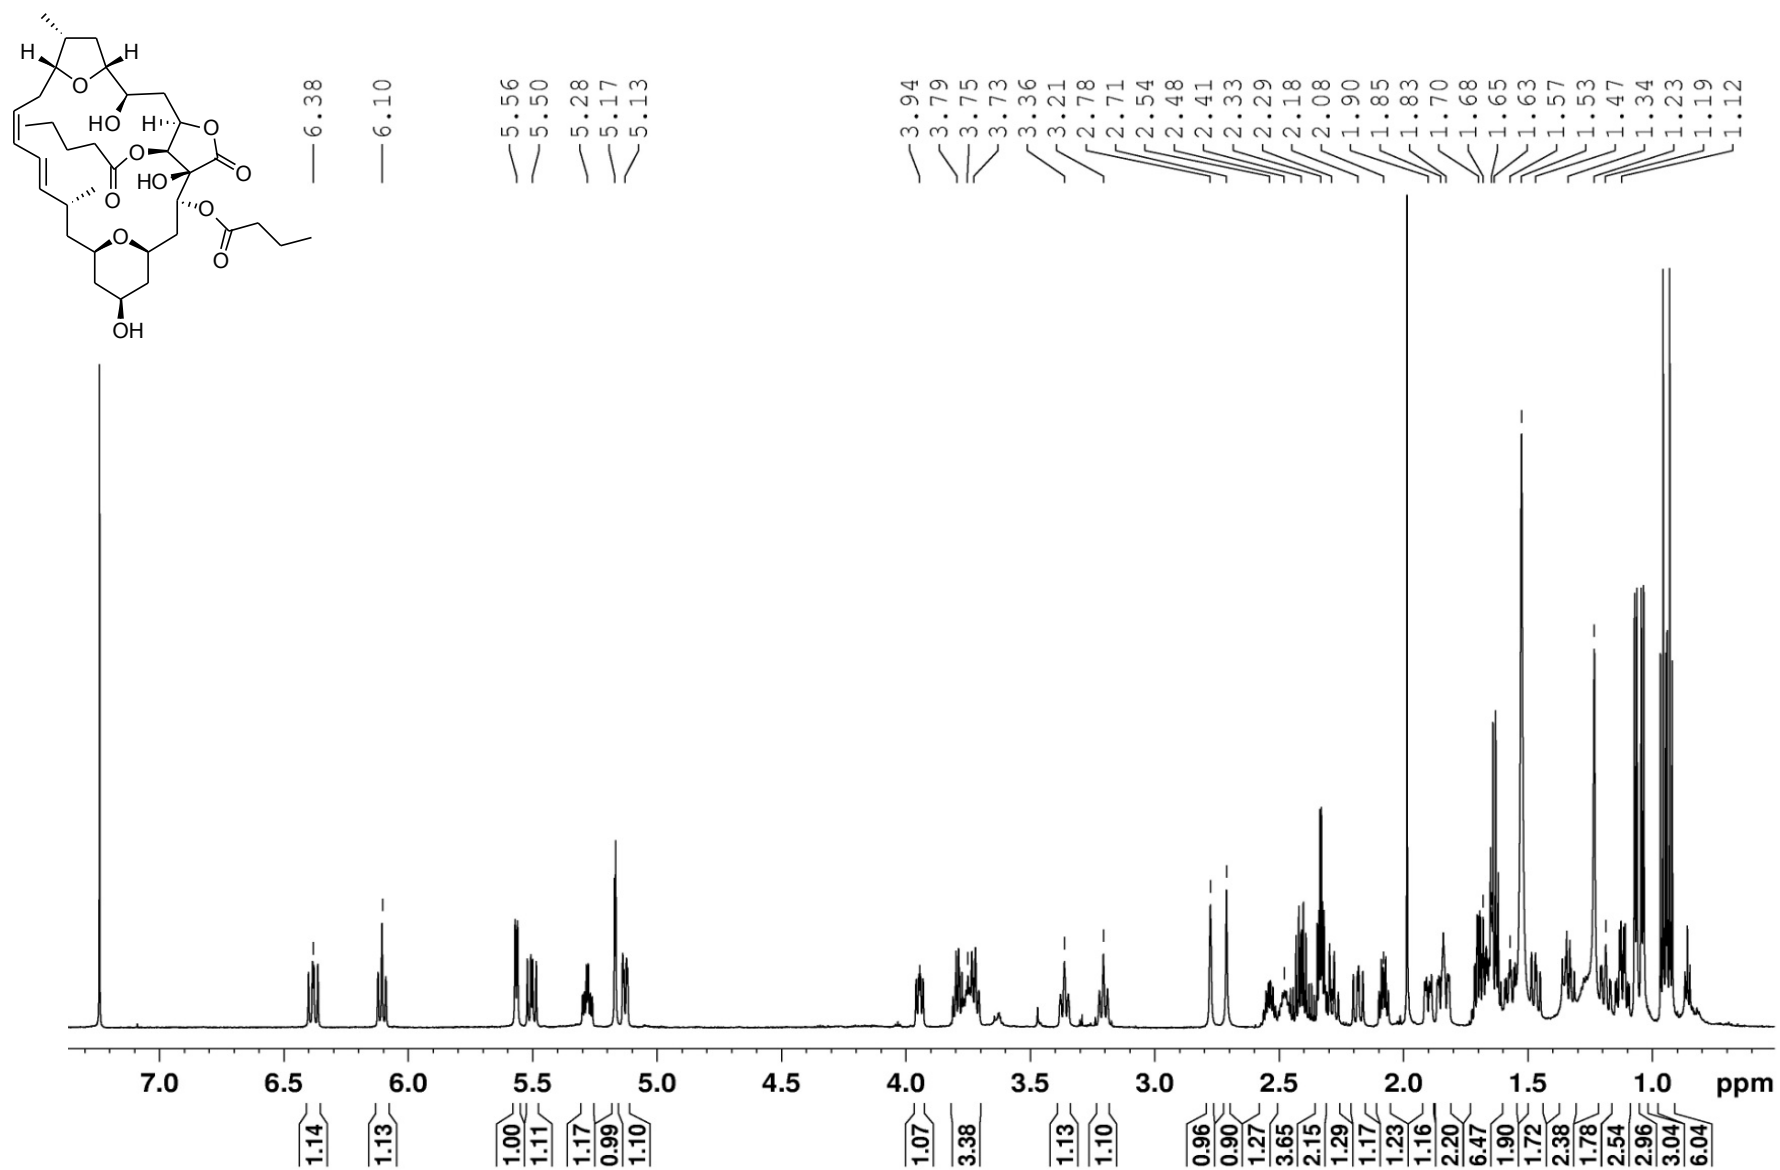

Figure S44. <sup>1</sup>H NMR spectrum for mandelalide D (4; 700 MHz, CDCl<sub>3</sub>)

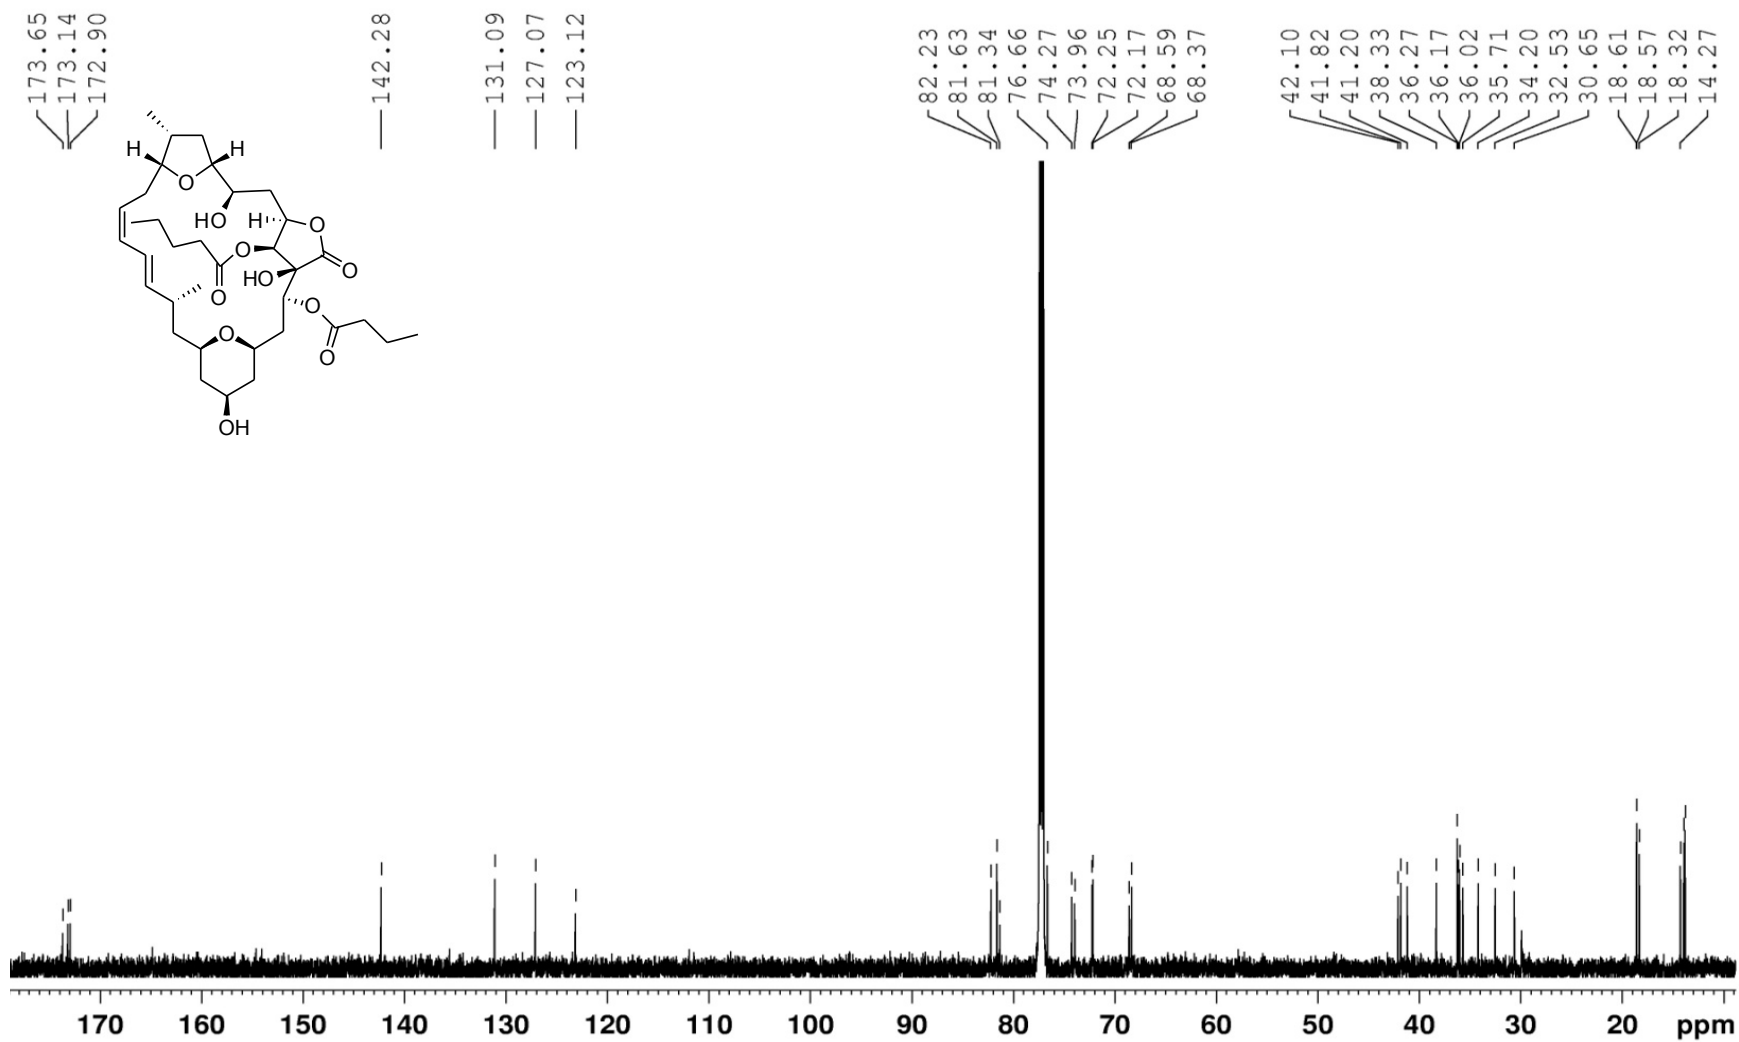

Figure S45. <sup>13</sup>C NMR spectrum for mandelalide D (4; 175 MHz, CDCl<sub>3</sub>)

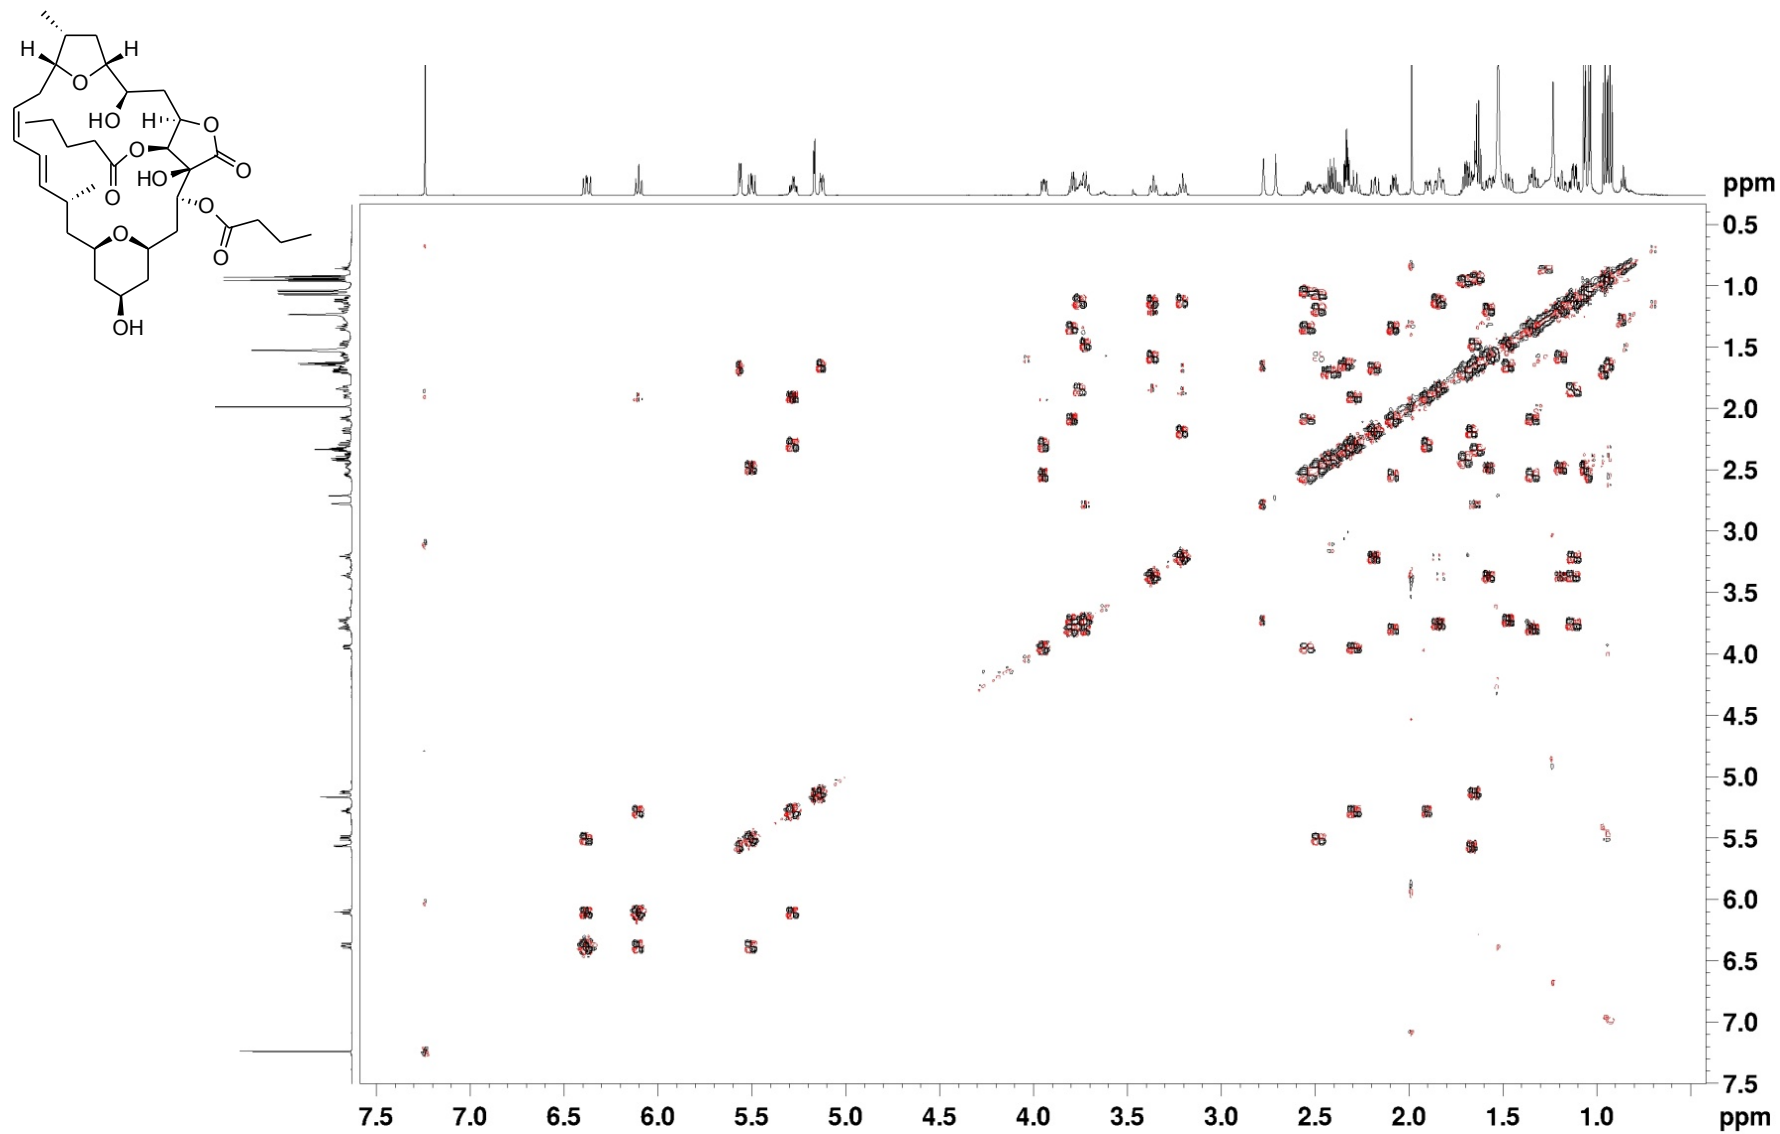

Figure S46. COSY NMR spectrum for mandelalide D (4; 700 MHz, CDCl<sub>3</sub>)

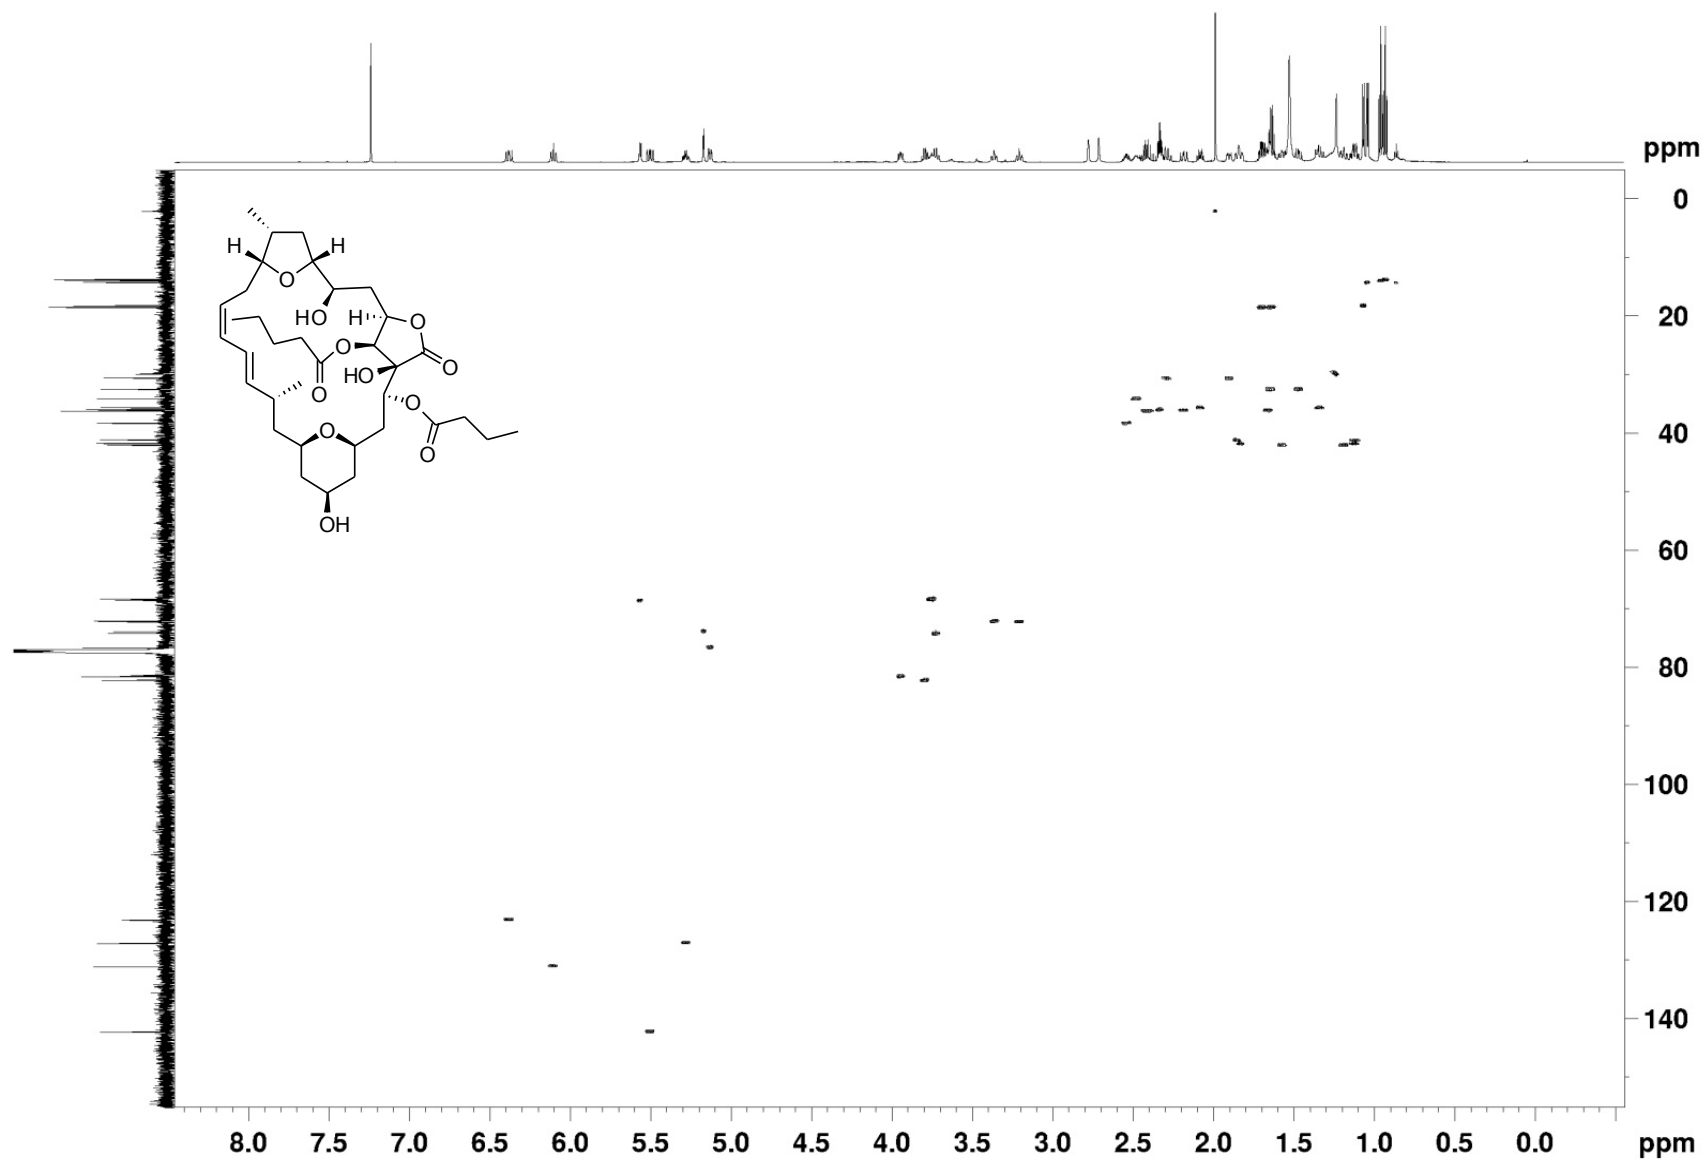

Figure S47. HSQC NMR spectrum for mandelalide D (4; 700 MHz,  $\text{CDCl}_3$ )

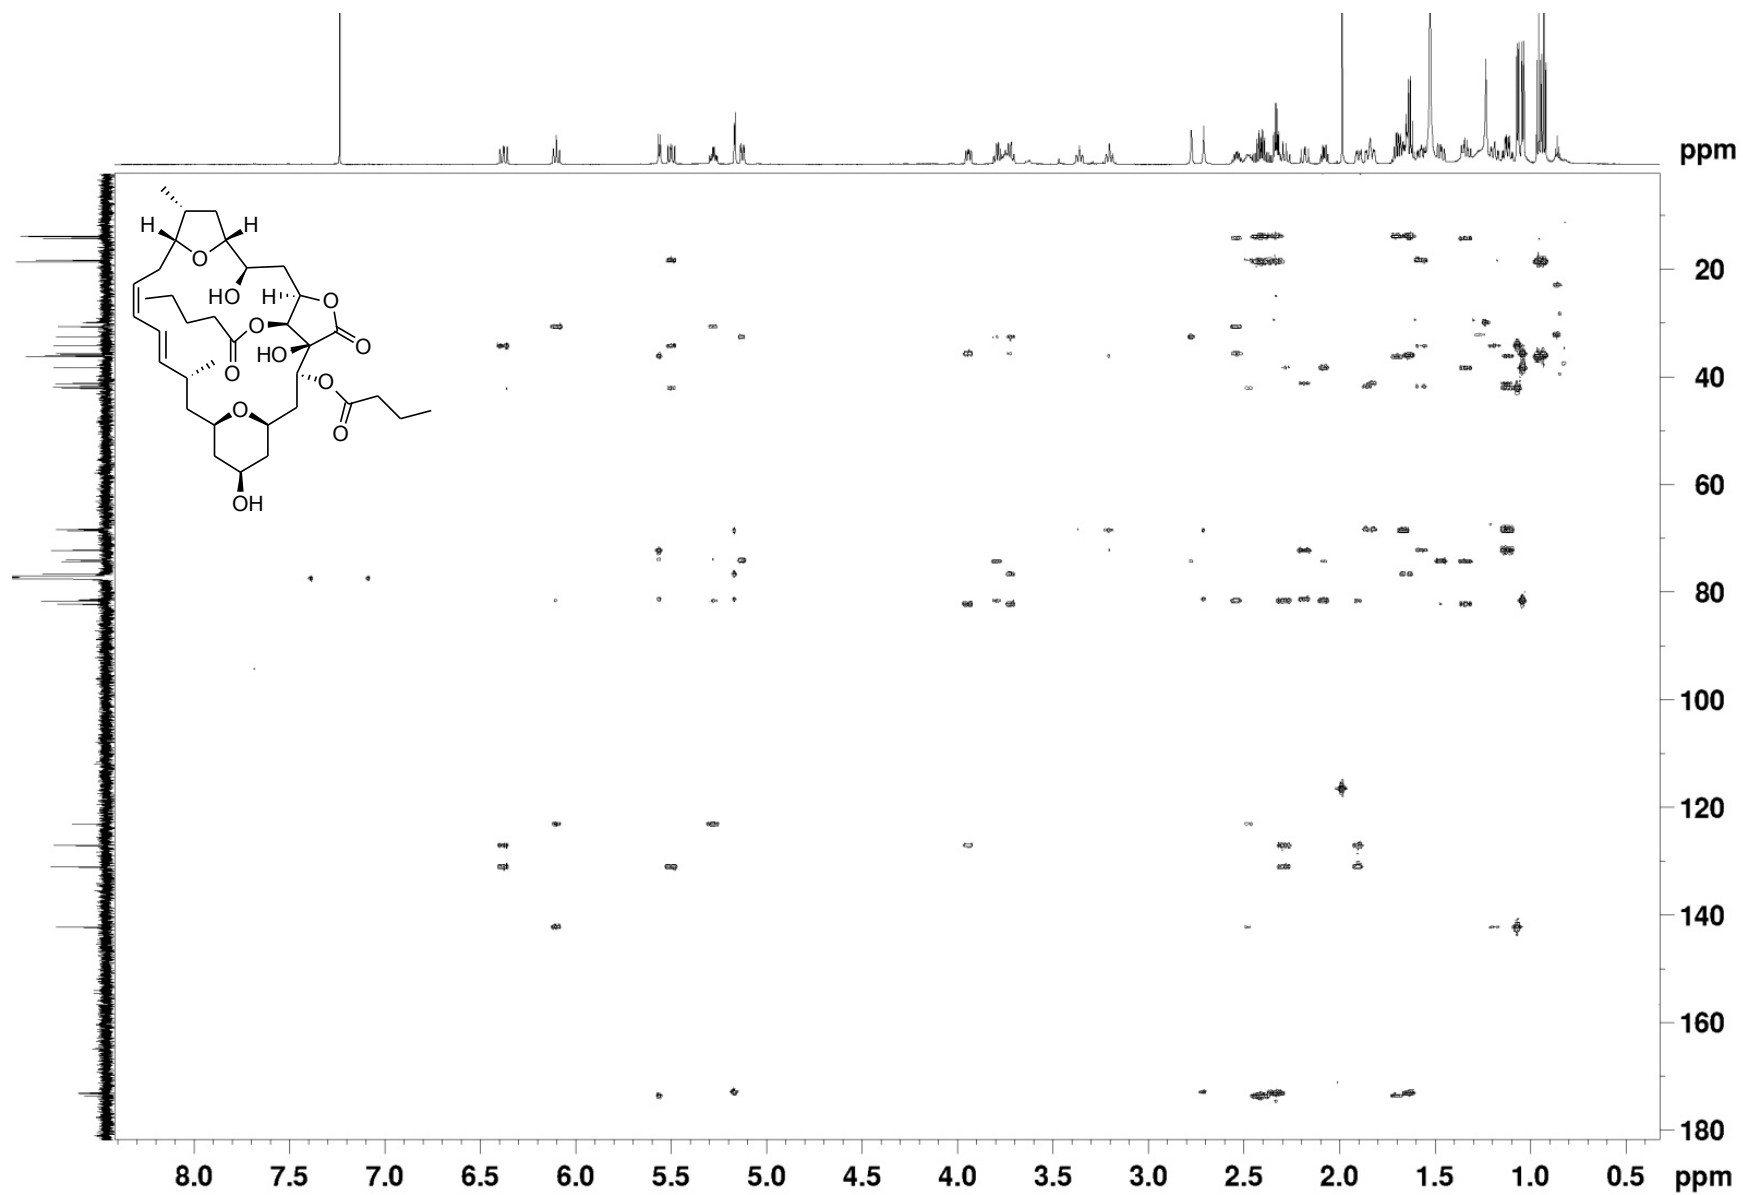

Figure S48. HMBC NMR spectrum for mandelalide D (4; 700 MHz, CDCl<sub>3</sub>)

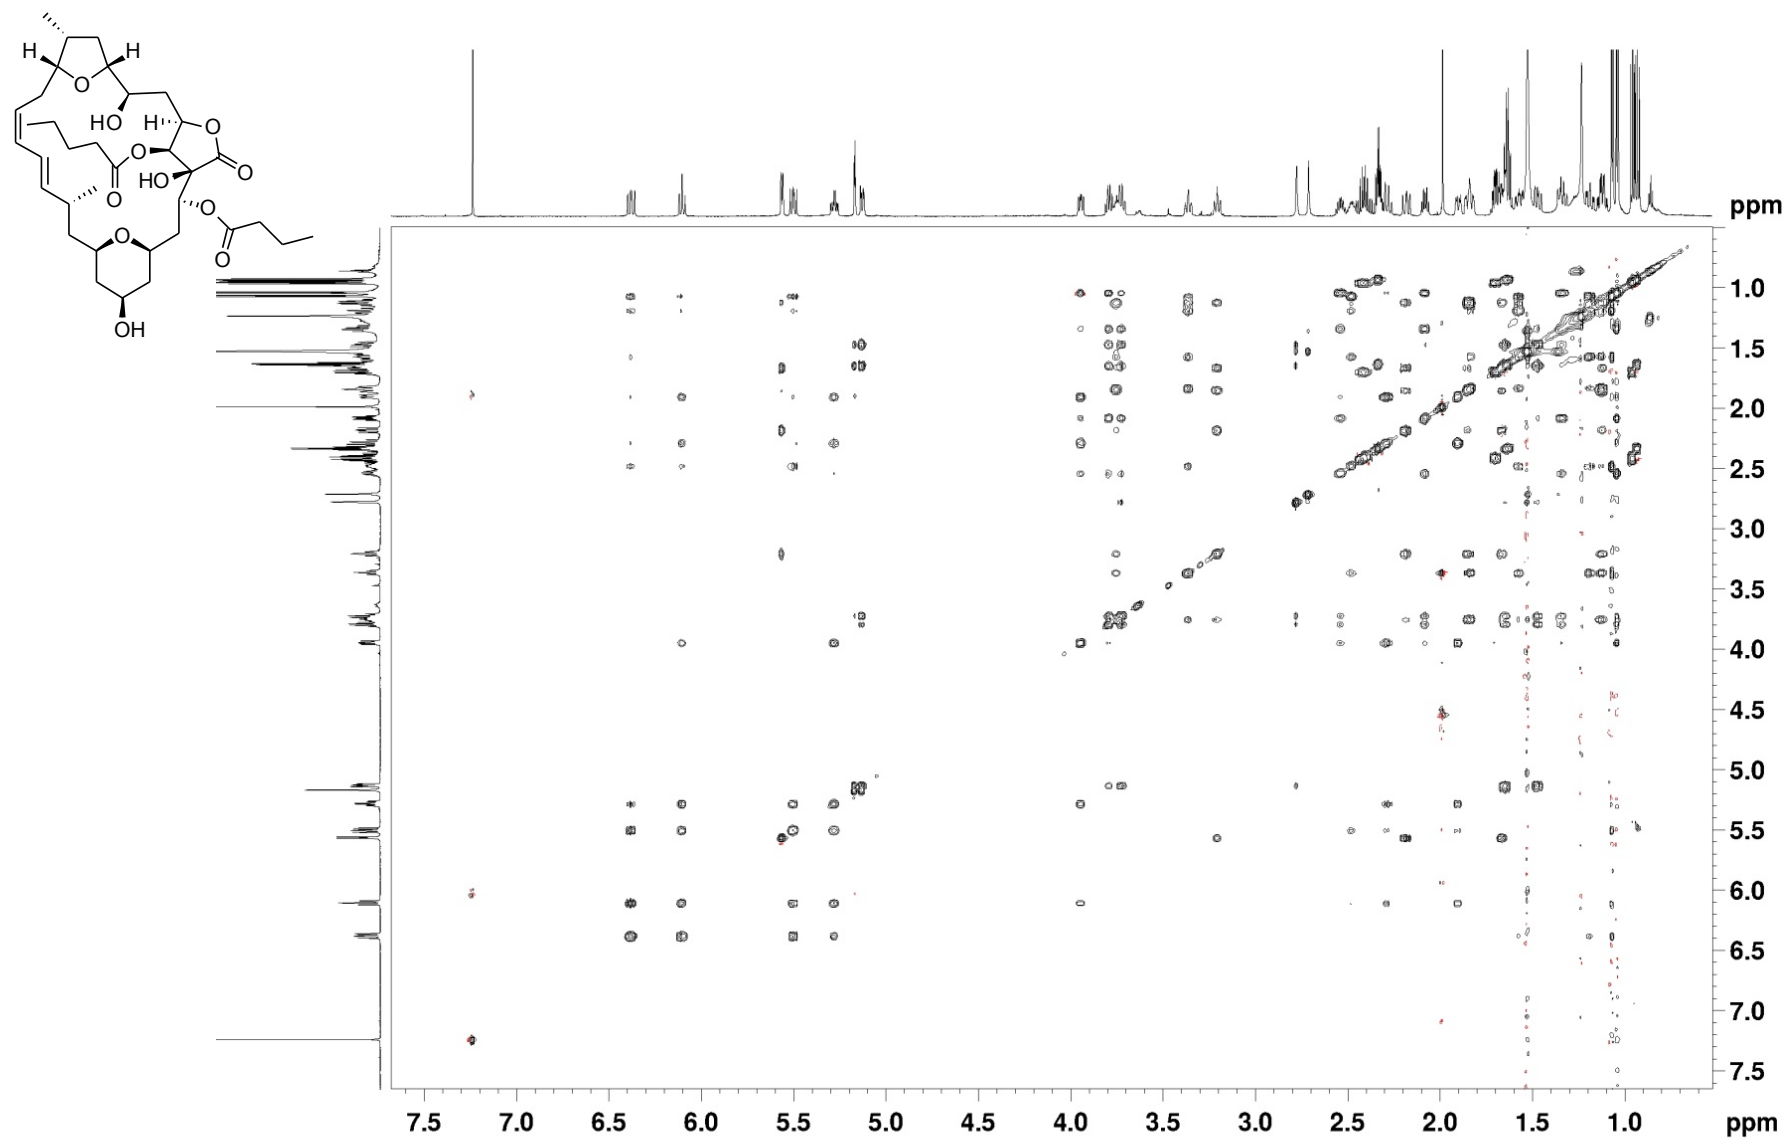

Figure S49. TOCSY NMR spectrum for mandelalide D (4; 700 MHz, CDCl<sub>3</sub>)

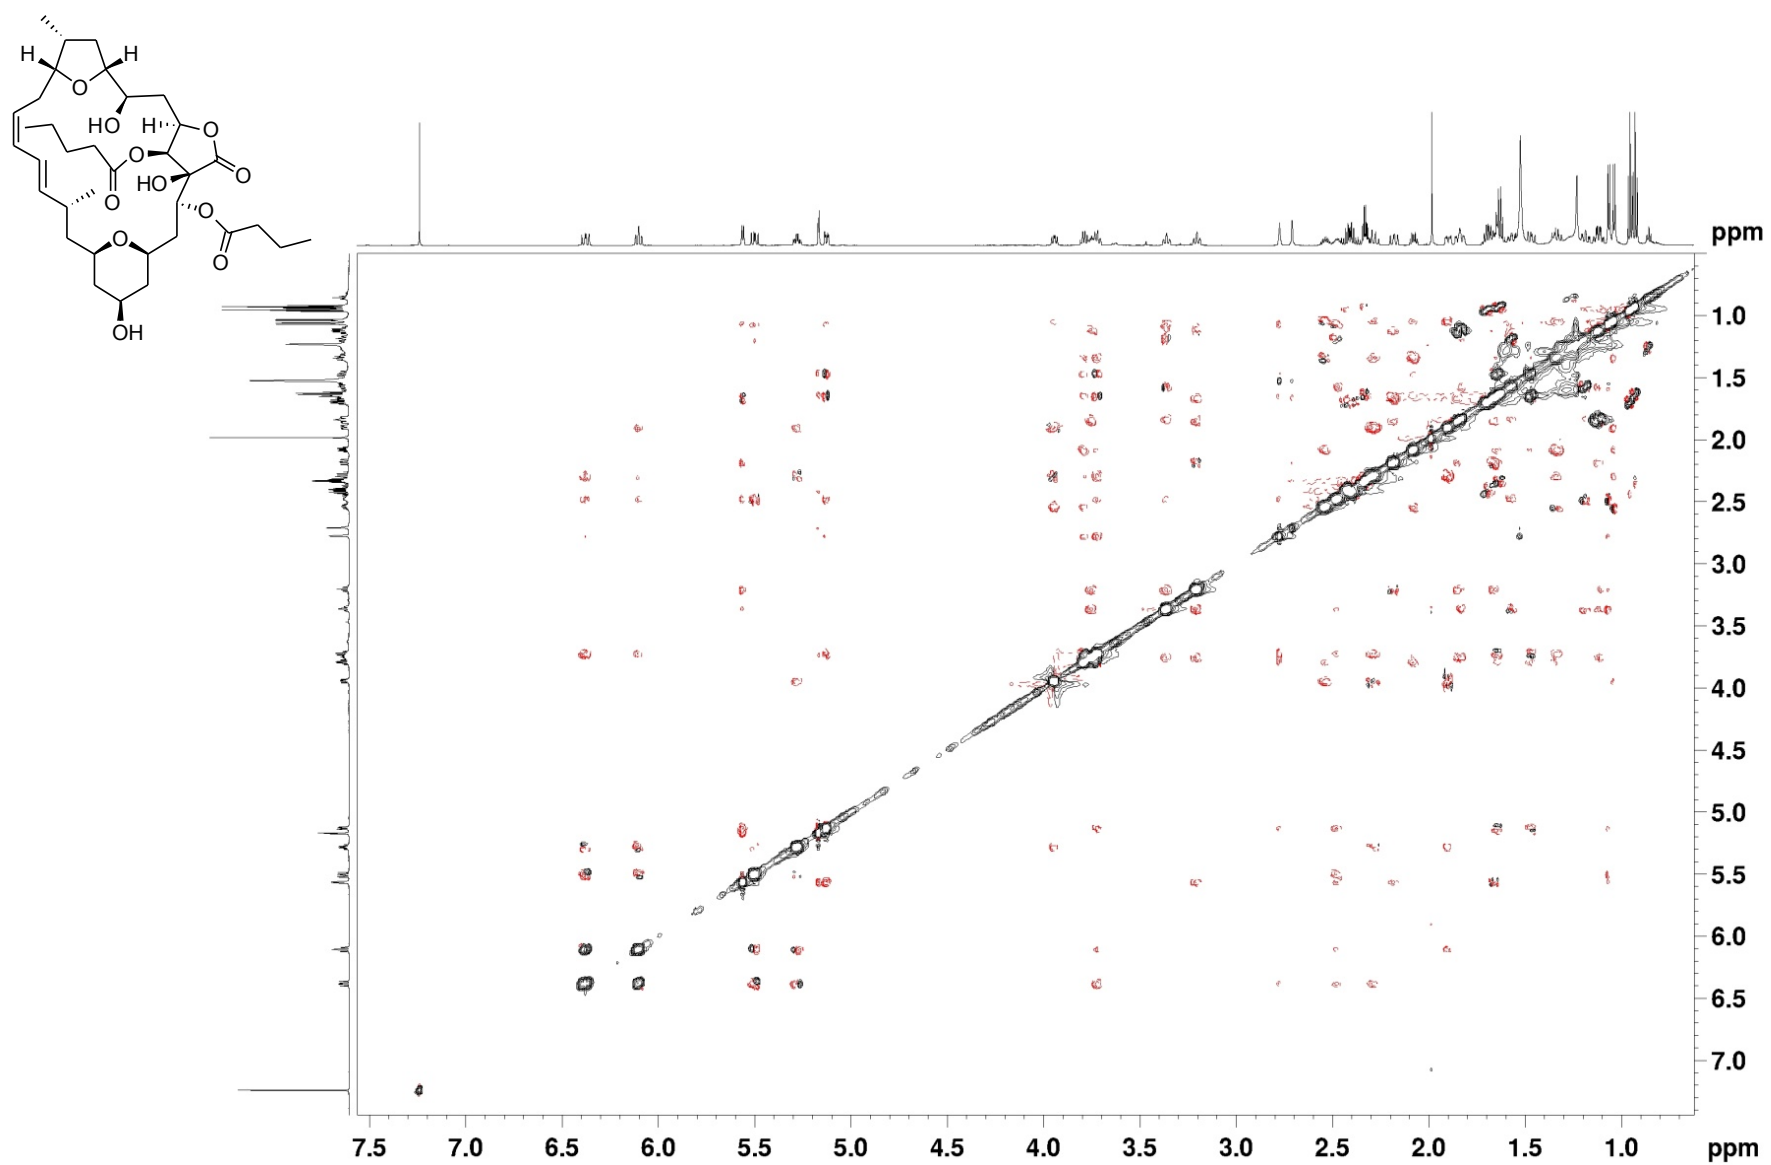

Figure S50. ROESY NMR spectrum for mandelalide D (4; 700 MHz, CDCl<sub>3</sub>)

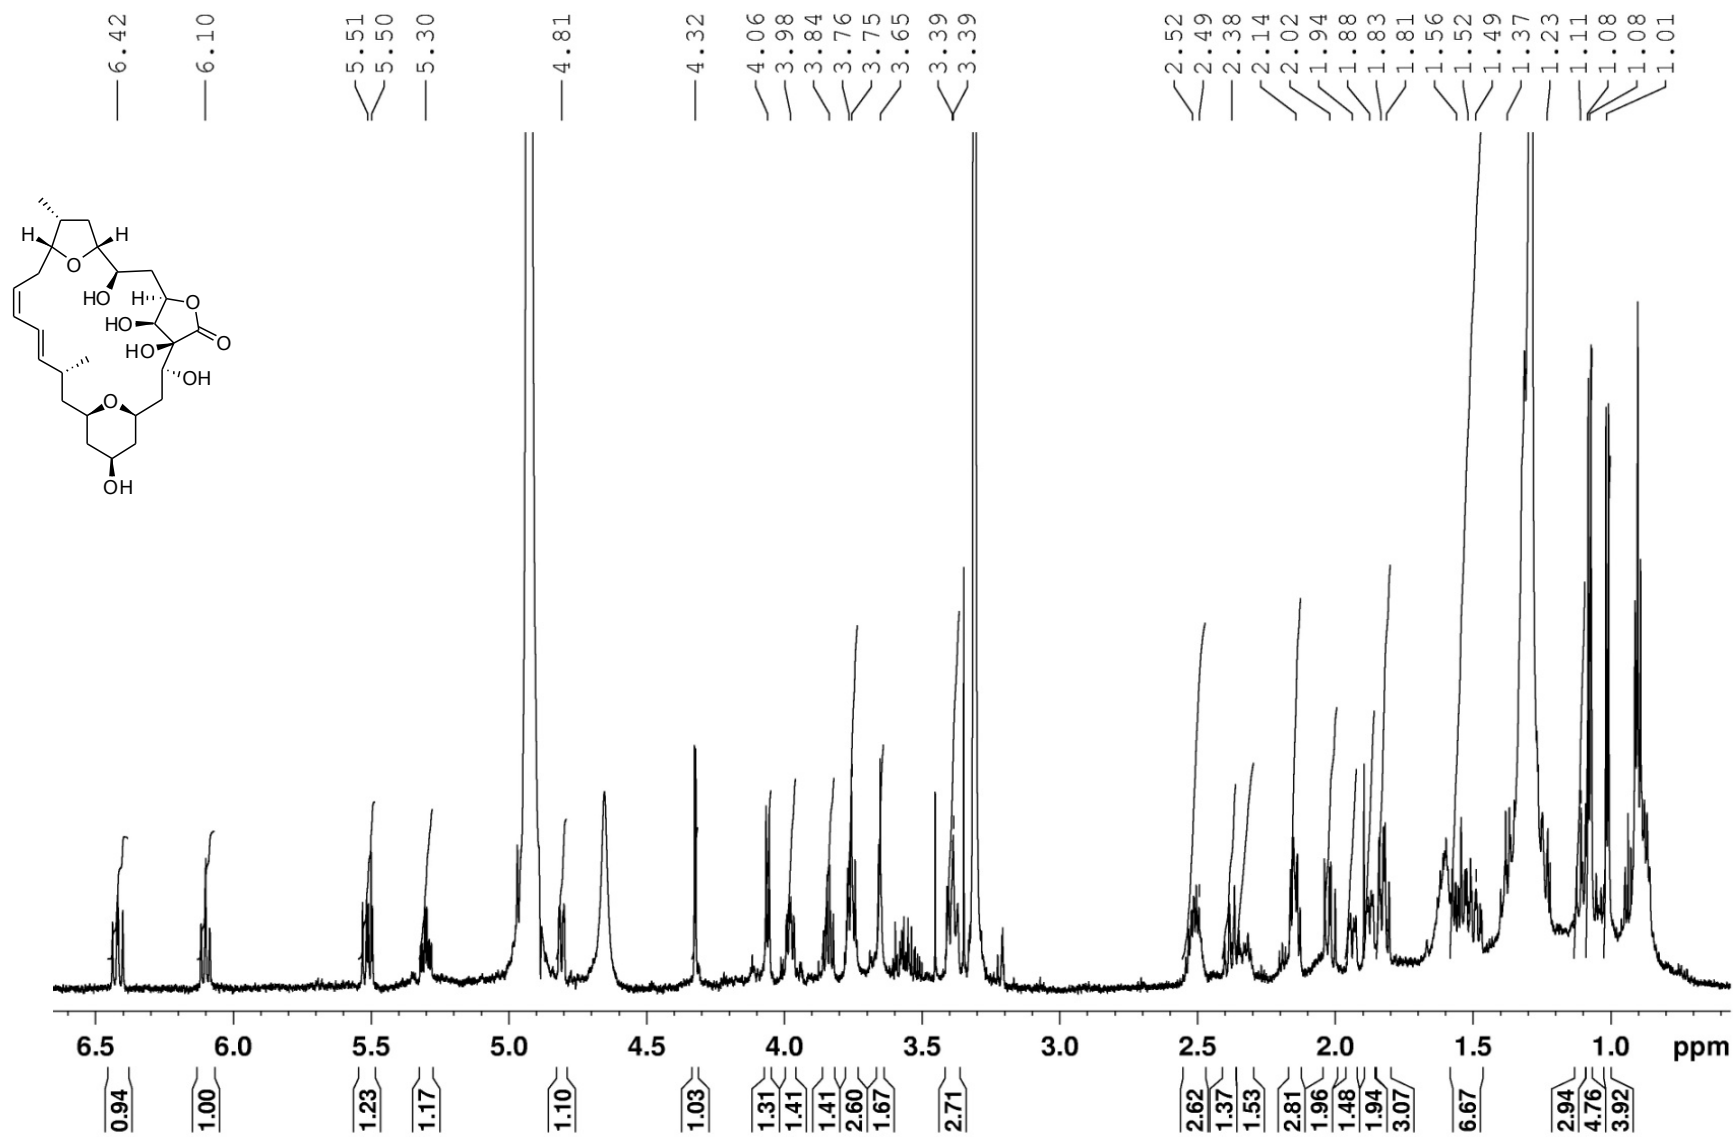

Figure S51. <sup>1</sup>H NMR spectrum for deacylmandelalide D (**4b**; 700 MHz, MeOD)



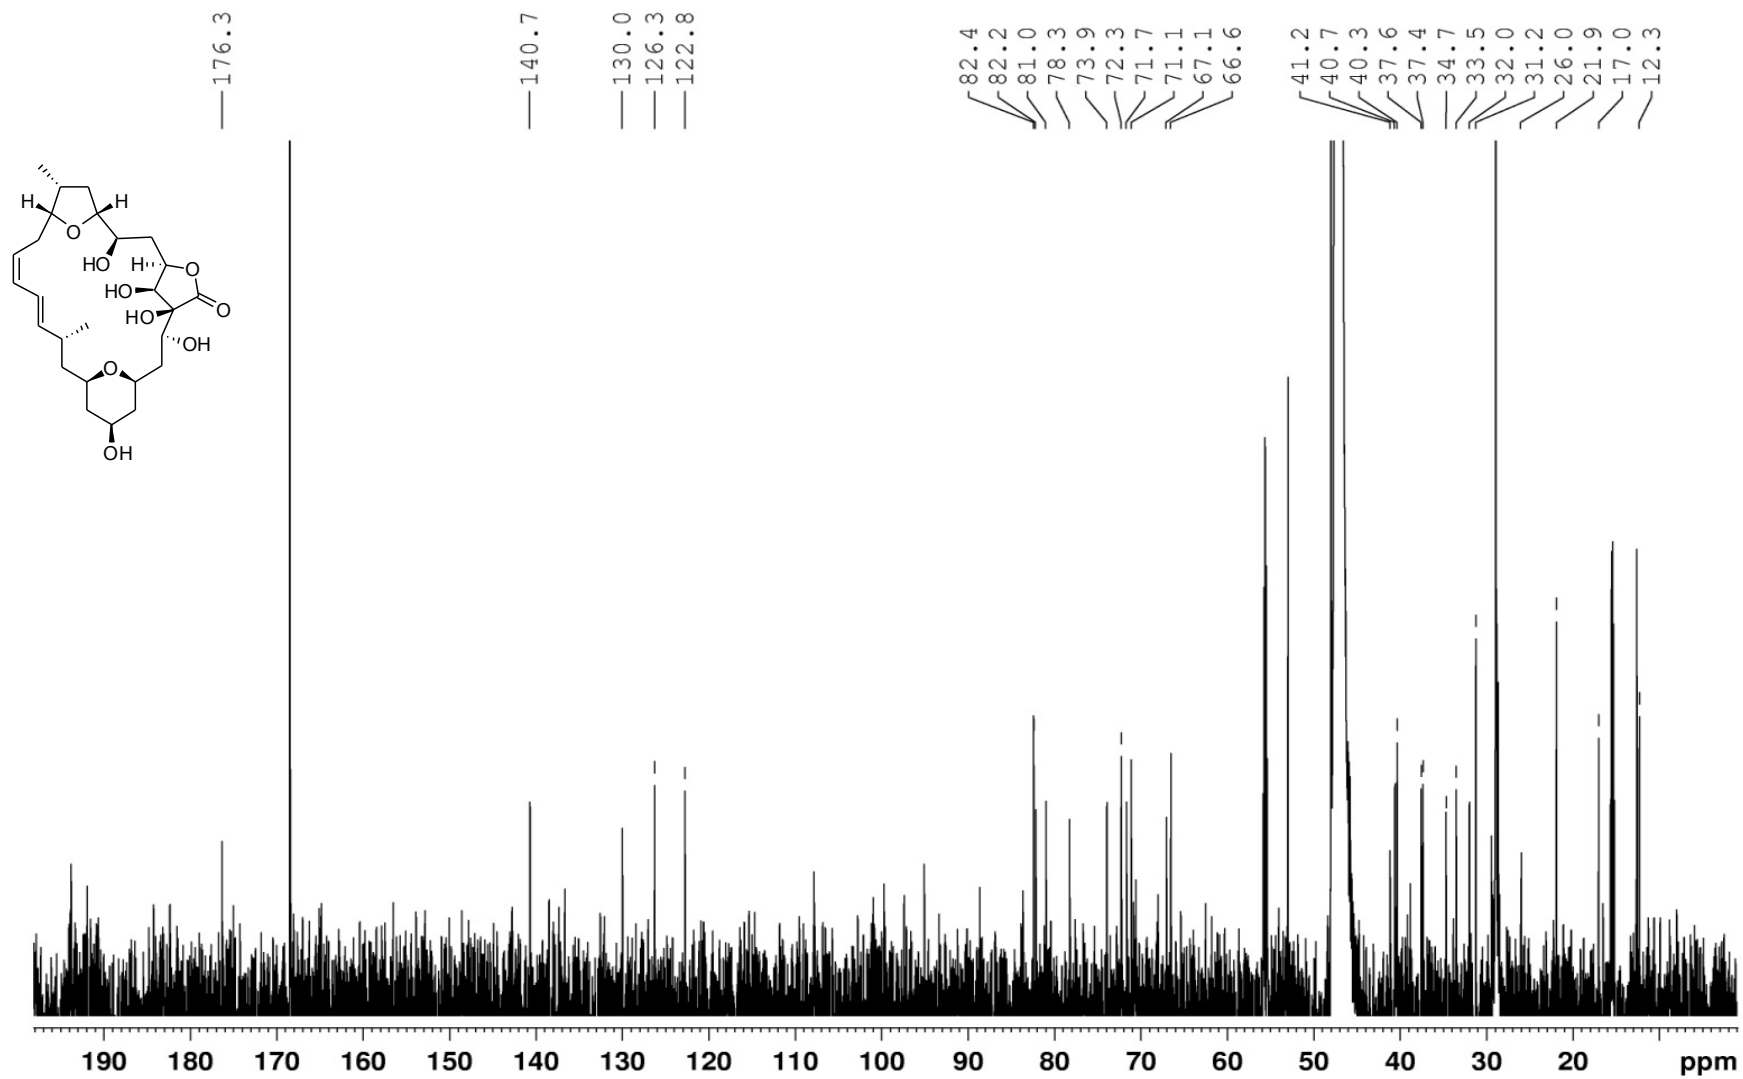

Figure S52. <sup>13</sup>C NMR spectrum for deacylmandelalide D (**4b**; 175 MHz, MeOD)

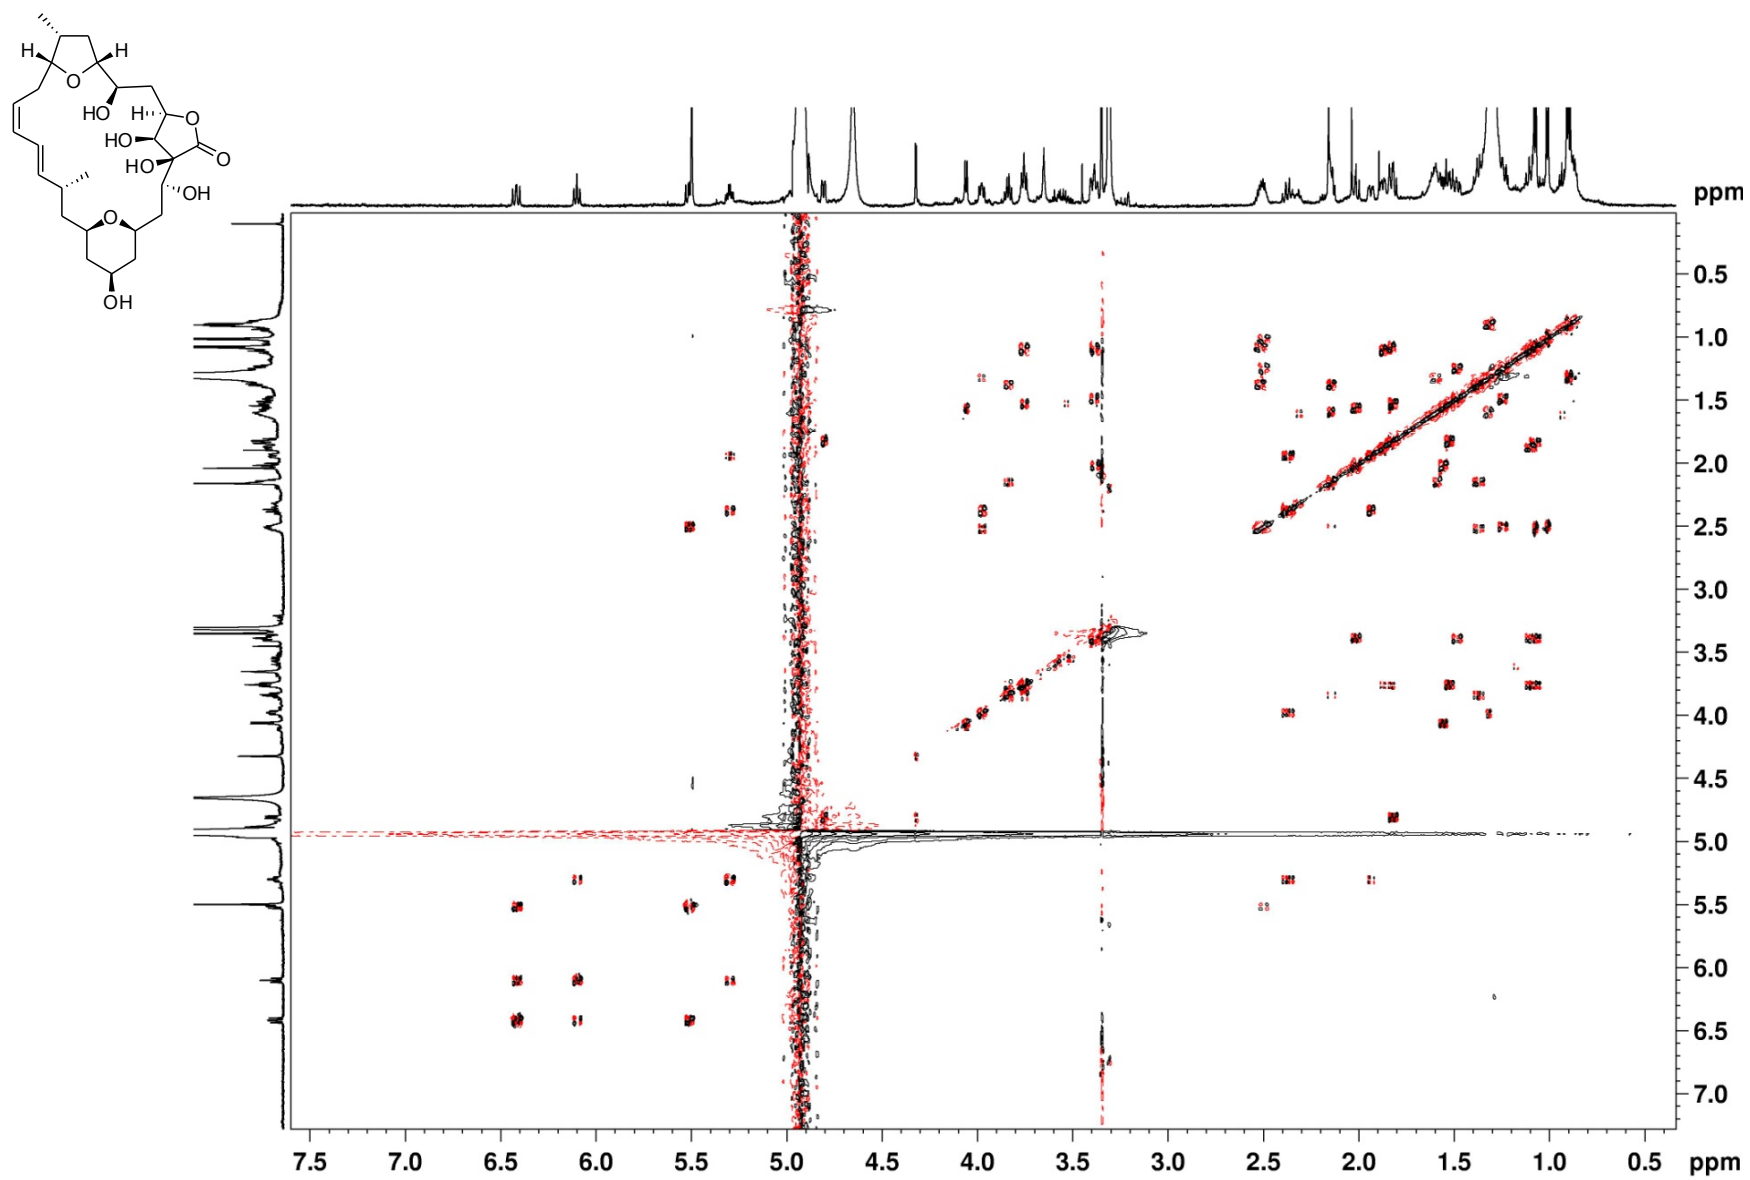

Figure S53. COSY NMR spectrum for deacylmandelalide D (**4b**; 700 MHz, MeOD)

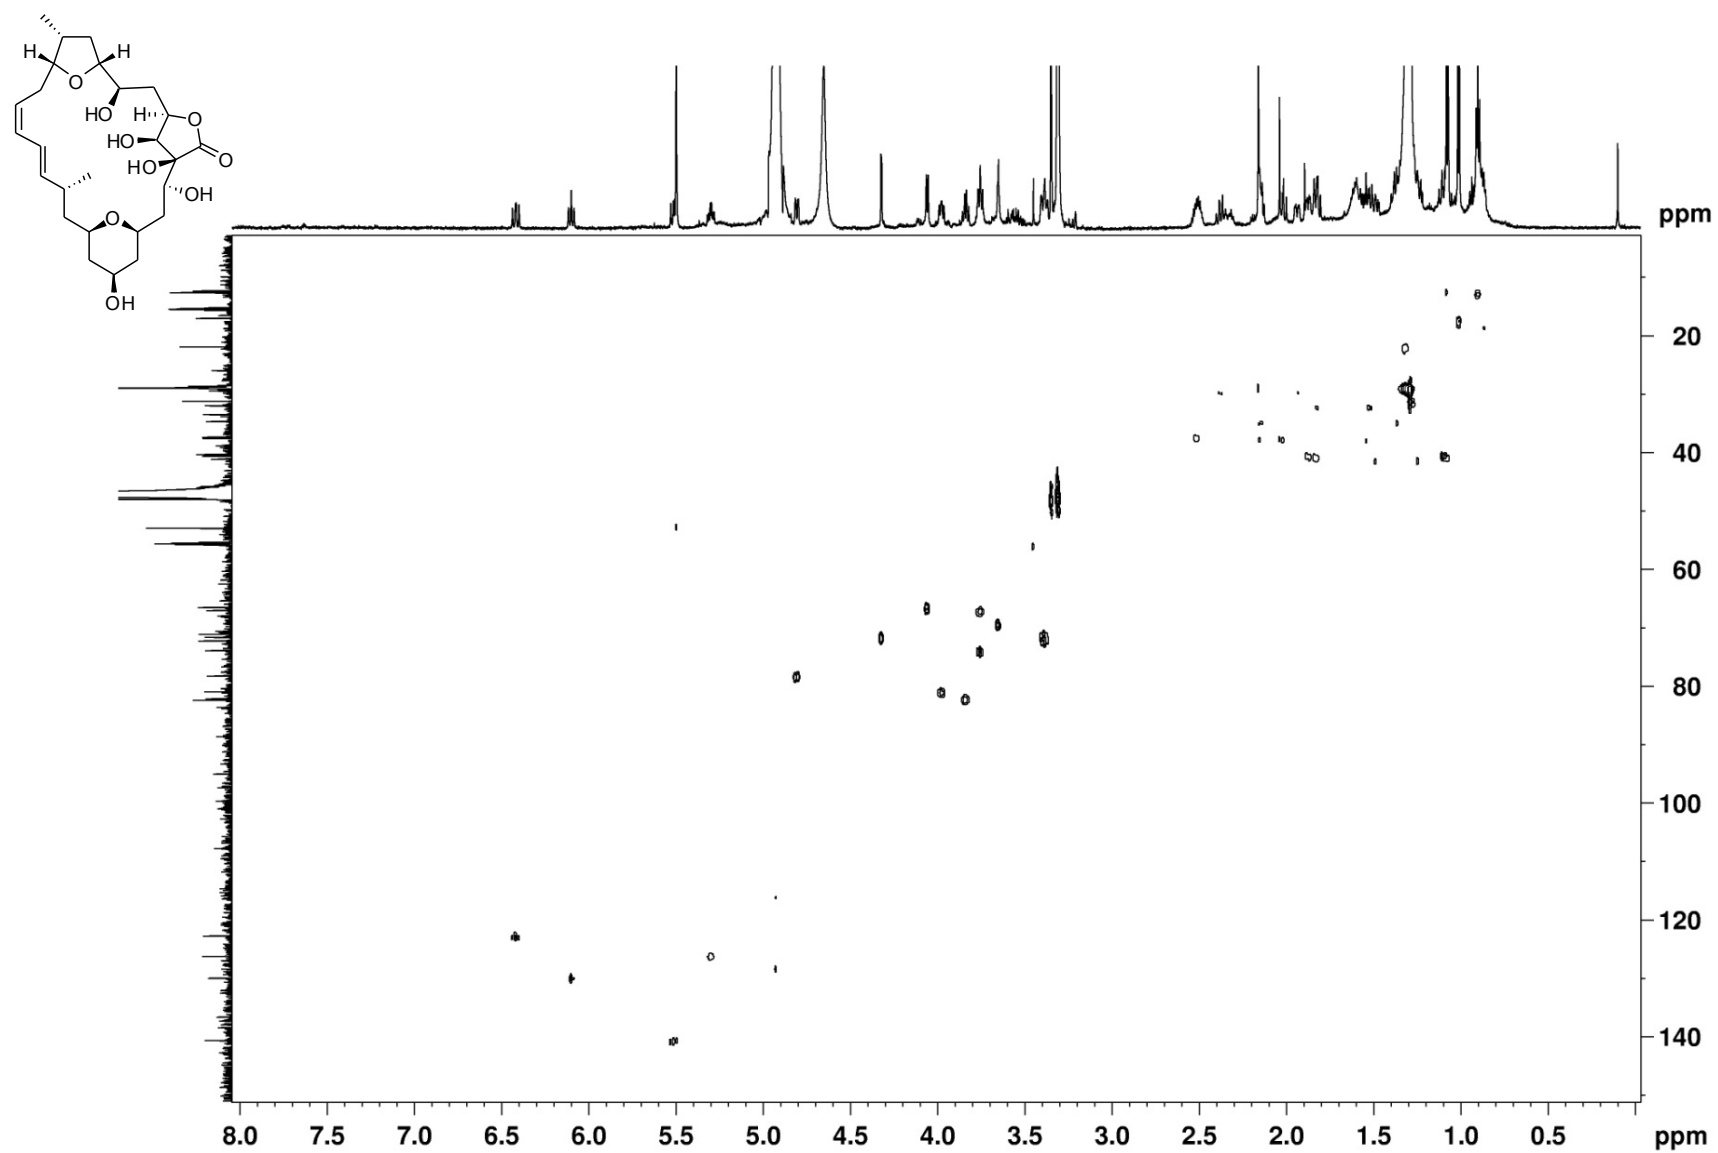

Figure S54. HSQC NMR spectrum for deacylmandelalide D (**4b**; 700 MHz, MeOD)

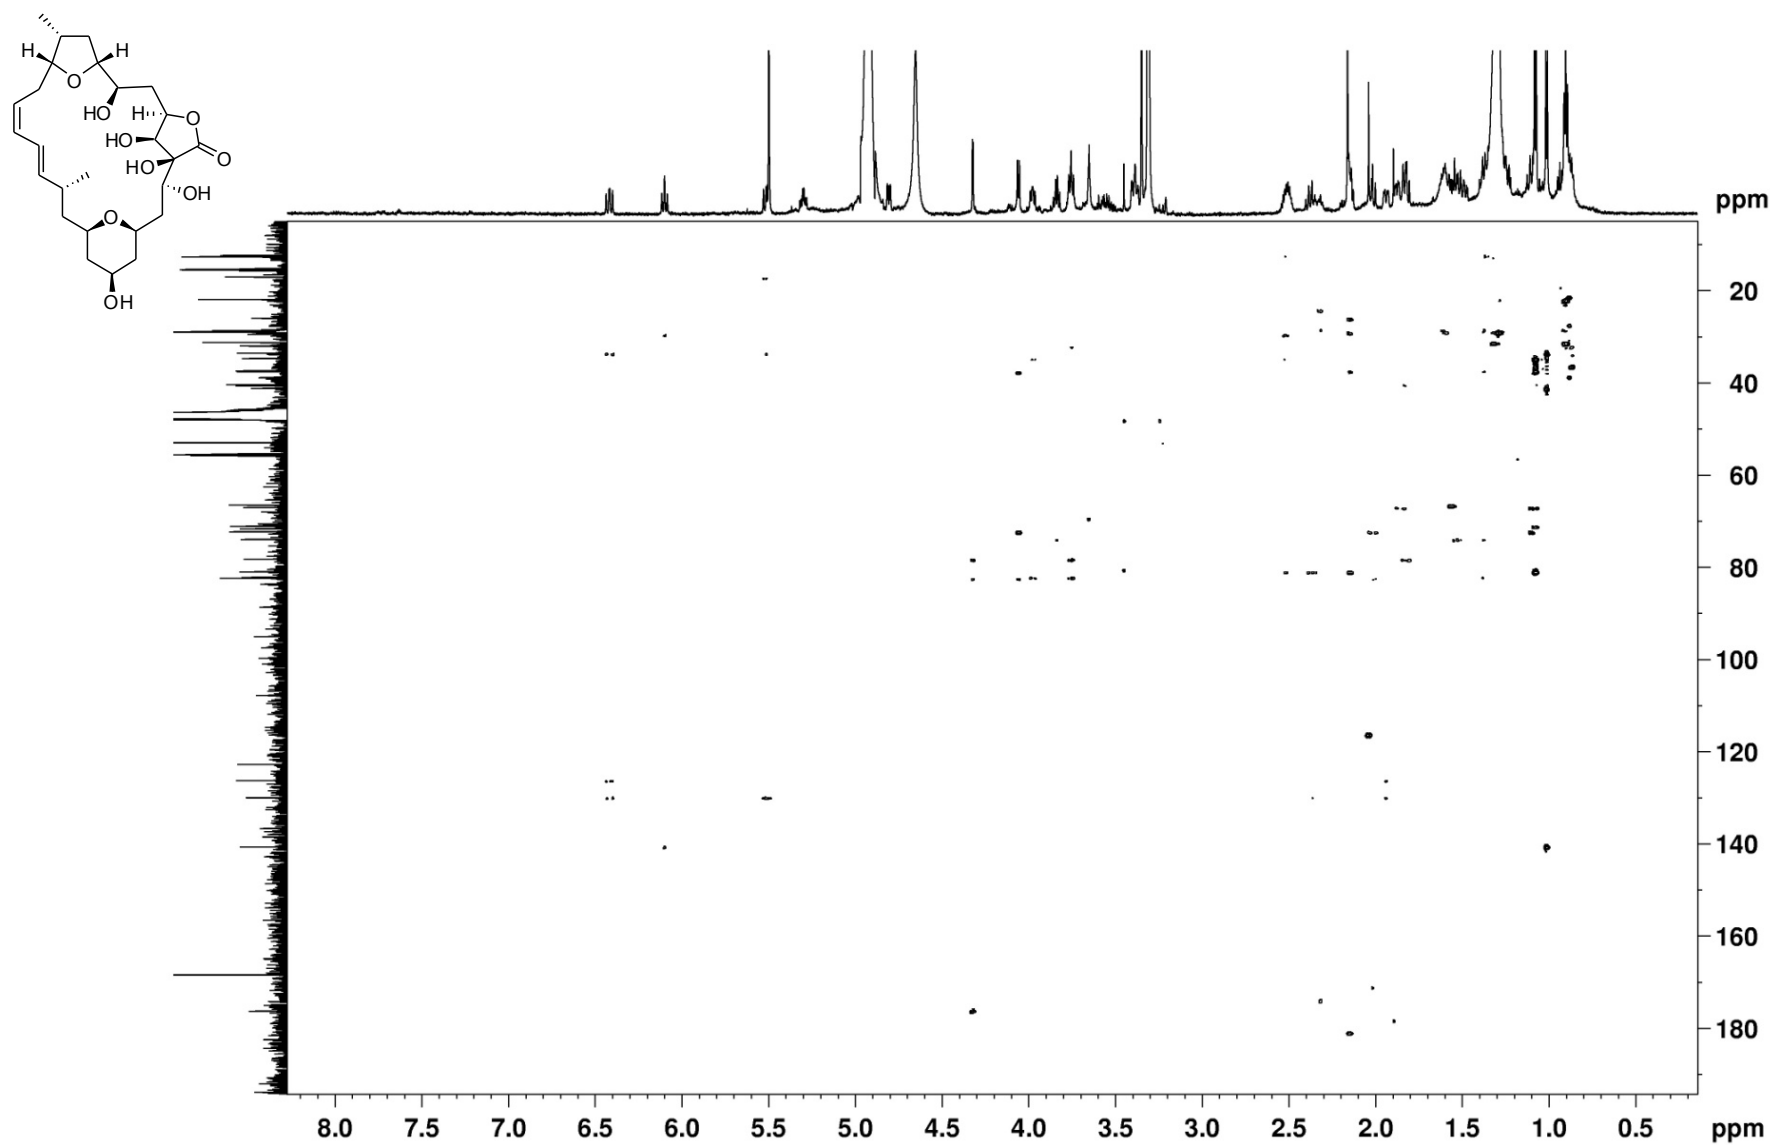

Figure S55. HMBC NMR spectrum for deacylmandelalide D (**4b**; 700 MHz, MeOH)

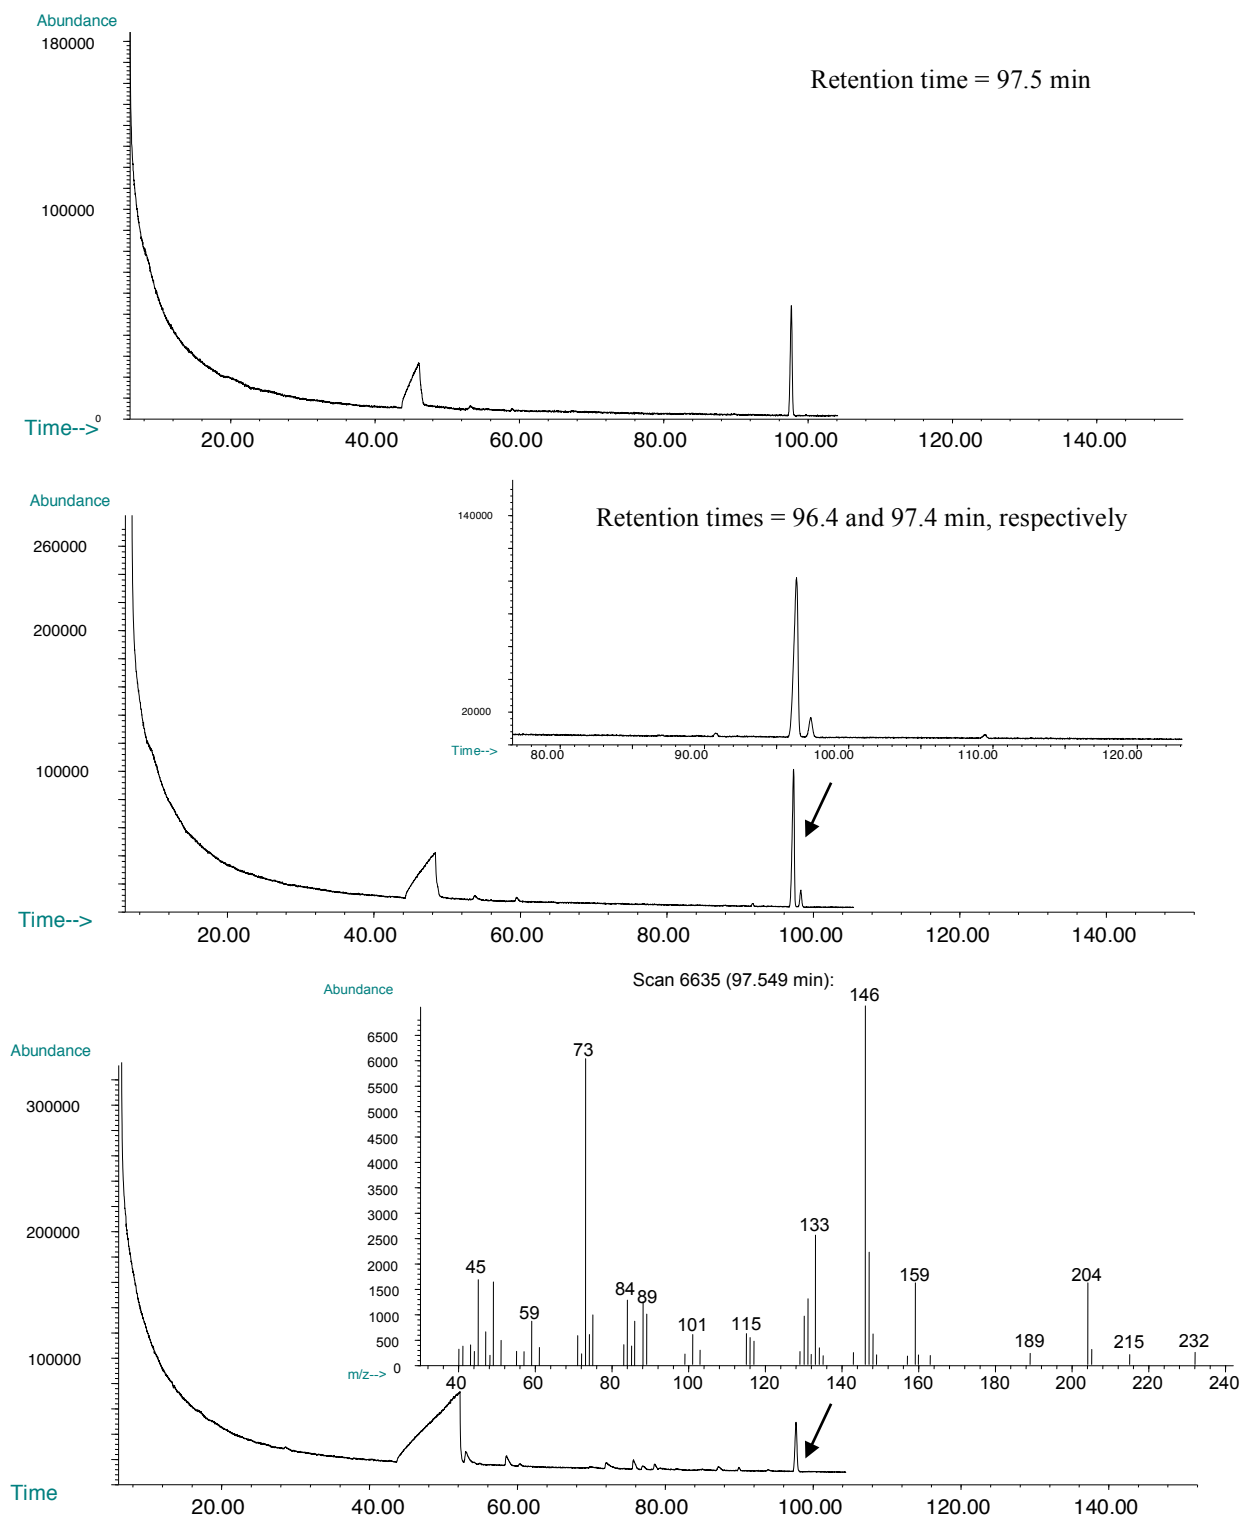

Figure S56. GCMS chromatograms for 1,2-di-*O*-methyl-3,4-di-*O*-TMS- $\alpha$ -L-rhamnose co-injected with the permethylated/silylated hydrolysate of mandelalide A (upper), 1,2-di-*O*-methyl-3,4-di-*O*-TMS- $\alpha$ -D-rhamnose co-injected with the permethylated/silylated hydrolysate of mandelalide A (middle chromatogram, left and right peaks, respectively), and the permethylated and silylated hydrolysate of mandelalide A with EI mass spectrum (bottom).

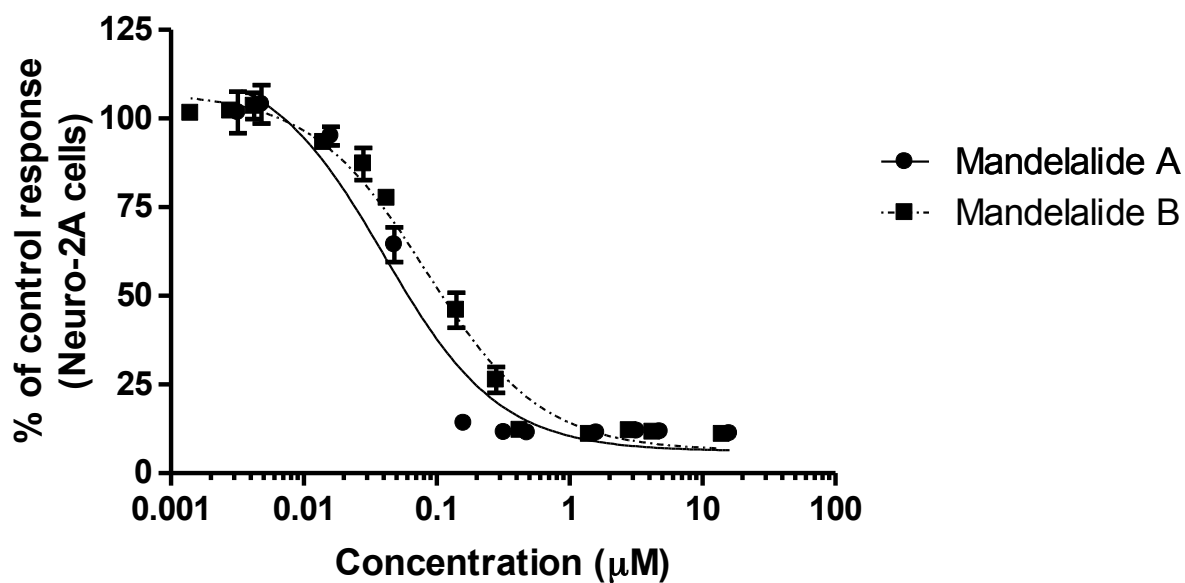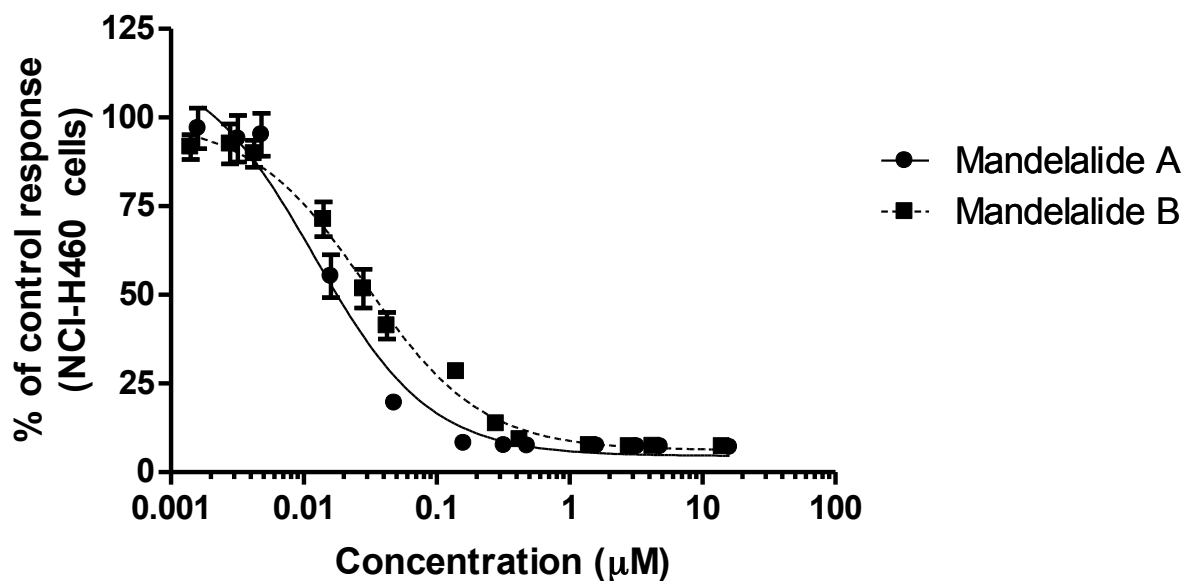

Figure S57. The dose response curves for mandelalides A and B in mouse Neuro2A neuroblastoma and human NCI-H460 cell lines, following 48 h incubation. Cell viability was assessed by MTT assay and is expressed relative to the response of solvent vehicle-treated cells.
